# Supplementary material for: Transcriptome analysis and identification of genes associated with floral transition and fruit development in rabbiteye blueberry (Vaccinium ashei)
Source: PLoS One. 2021 Oct 28;16(10):e0259119. doi: 10.1371/journal.pone.0259119 (PMC8553168; doi:10.1371/journal.pone.0259119)
Supplement: S3 Table — (XLSX) [file pone.0259119.s003.xlsx]

## Sheet: S3_vs_S2
S3 Table. Differentially expressed genes between stages S3 and S2.
Description	ID	stages	logFC	regulation	p_vlaue	adjusted p_value
abscisic stress-ripening protein 3	VaccDscaff24-augustus-gene-38.30	Initial_vs_Flower_bud	-8.27828	down	5e-05	0.000509113
Low temperature and salt responsive protein family	VaccDscaff3-snap-gene-62.29	Initial_vs_Flower_bud	-7.77376	down	5e-05	0.000509113
Integrase-type DNA-binding superfamily protein	VaccDscaff28-processed-gene-109.3	Initial_vs_Flower_bud	-7.49871	down	5e-05	0.000509113
dehydration-induced protein (ERD15)	VaccDscaff29-augustus-gene-116.28	Initial_vs_Flower_bud	-7.32606	down	5e-05	0.000509113
growth-regulating factor 8	VaccDscaff28-augustus-gene-2.28	Initial_vs_Flower_bud	-5.76811	down	5e-05	0.000509113
Adenine nucleotide alpha hydrolases-like superfamily protein	VaccDscaff47-augustus-gene-192.29	Initial_vs_Flower_bud	-5.61052	down	0.0043	0.024449
alanine:glyoxylate aminotransferase	VaccDscaff28-snap-gene-180.28	Initial_vs_Flower_bud	-5.39725	down	0.0001	0.000960986
SWAP (Suppressor-of-White-APricot)/surp domain-containing protein / D111/G-patch domain-containing protein	VaccDscaff23-snap-gene-200.38	Initial_vs_Flower_bud	-5.30641	down	0.0023	0.0144852
dihydrouridine synthase 1-like	VaccDscaff1685-augustus-gene-0.3	Initial_vs_Flower_bud	-5.21887	down	5e-05	0.000509113
Glutathione S-transferase family protein	VaccDscaff3-augustus-gene-167.39	Initial_vs_Flower_bud	-5.16707	down	5e-05	0.000509113
phosphate transporter 4;1	VaccDscaff47-augustus-gene-108.32	Initial_vs_Flower_bud	-5.14385	down	5e-05	0.000509113
ankyrin repeat-containing 2B	VaccDscaff30-snap-gene-76.28	Initial_vs_Flower_bud	-5.03094	down	5e-05	0.000509113
UDP-glucosyltransferase 74F2	VaccDscaff4-augustus-gene-152.30	Initial_vs_Flower_bud	-4.9173	down	5e-05	0.000509113
PHD finger protein ALFIN-LIKE 1-like	VaccDscaff19-augustus-gene-40.37	Initial_vs_Flower_bud	-4.91551	down	0.0026	0.0160553
Translation protein SH3-like family protein	VaccDscaff4-augustus-gene-312.21	Initial_vs_Flower_bud	-4.83628	down	5e-05	0.000509113
ribulose bisphosphate carboxylase small chain 1A	VaccDscaff7-augustus-gene-327.30	Initial_vs_Flower_bud	-4.83216	down	0.0055	0.0298735
rotamase CYP 4	VaccDscaff46-snap-gene-208.36	Initial_vs_Flower_bud	-4.81566	down	0.0002	0.00178731
AT hook motif DNA-binding family protein	VaccDscaff48-augustus-gene-30.29	Initial_vs_Flower_bud	-4.79384	down	5e-05	0.000509113
P-glycoprotein 9	VaccDscaff24-snap-gene-271.29	Initial_vs_Flower_bud	-4.7252	down	0.0102	0.0492971
extensin 3	VaccDscaff3-augustus-gene-101.22	Initial_vs_Flower_bud	-4.70741	down	0.0004	0.00328645
probable protein phosphatase 2C 8	VaccDscaff48-augustus-gene-100.30	Initial_vs_Flower_bud	-4.67251	down	5e-05	0.000509113
damage specific DNA binding protein 2	VaccDscaff7-snap-gene-282.36	Initial_vs_Flower_bud	-4.66855	down	0.00285	0.0173568
Membrane protein PM19L	VaccDscaff4-snap-gene-91.35	Initial_vs_Flower_bud	-4.62108	down	0.00915	0.0451879
metallothiol transferase FosB	VaccDscaff34-augustus-gene-39.38	Initial_vs_Flower_bud	-4.62032	down	0.0047	0.0262955
Werner syndrome RecQ like helicase	VaccDscaff1-augustus-gene-12.27	Initial_vs_Flower_bud	-4.40083	down	0.00145	0.00992179
elongation factor 1-beta 1	VaccDscaff24-snap-gene-359.38	Initial_vs_Flower_bud	-4.3956	down	5e-05	0.000509113
Integrase-type DNA-binding superfamily protein	VaccDscaff44-processed-gene-111.1	Initial_vs_Flower_bud	-4.35559	down	5e-05	0.000509113
chloroplast beta-amylase	VaccDscaff3-processed-gene-363.3	Initial_vs_Flower_bud	-4.25277	down	0.0009	0.00664913
heat shock transcription factor C1	VaccDscaff41-augustus-gene-213.33	Initial_vs_Flower_bud	-4.25222	down	0.0089	0.0442415
cellulose synthase like G2	VaccDscaff4-processed-gene-62.1	Initial_vs_Flower_bud	-4.24648	down	5e-05	0.000509113
protein KRTCAP2 homolog	VaccDscaff4-snap-gene-333.35	Initial_vs_Flower_bud	-4.23952	down	0.00275	0.0168337
Putative AT-hook DNA-binding family protein	VaccDscaff23-processed-gene-275.10	Initial_vs_Flower_bud	-4.21499	down	0.0017	0.0112779
hypothetical protein	VaccDscaff48-augustus-gene-106.39	Initial_vs_Flower_bud	-4.16979	down	5e-05	0.000509113
Mitochondrial import inner membrane translocase subunit Tim17/Tim22/Tim23 family protein	VaccDscaff29-snap-gene-338.35	Initial_vs_Flower_bud	-4.16165	down	0.0053	0.0290156
ferredoxin thioredoxin reductase precursor	VaccDscaff30-snap-gene-333.33	Initial_vs_Flower_bud	-4.12715	down	0.00295	0.017862
Zinc finger C-x8-C-x5-C-x3-H type family protein	VaccDscaff3-processed-gene-423.7	Initial_vs_Flower_bud	-4.12581	down	0.0005	0.00400018
DnaJ heat shock protein family (Hsp40) member B6	VaccDscaff3-snap-gene-76.47	Initial_vs_Flower_bud	-4.12528	down	0.00675	0.035322
rotamase CYP 3	VaccDscaff2-processed-gene-436.6	Initial_vs_Flower_bud	-4.10495	down	5e-05	0.000509113
GDSL-like Lipase/Acylhydrolase family protein	VaccDscaff29-augustus-gene-228.27	Initial_vs_Flower_bud	-4.1029	down	5e-05	0.000509113
plasma membrane intrinsic protein 1C	VaccDscaff43-augustus-gene-249.24	Initial_vs_Flower_bud	-4.09089	down	5e-05	0.000509113
RING/U-box superfamily protein	VaccDscaff39-processed-gene-7.8	Initial_vs_Flower_bud	-4.09075	down	0.00845	0.0424535
growth-regulating factor 6-like	VaccDscaff31-augustus-gene-299.27	Initial_vs_Flower_bud	-4.05568	down	5e-05	0.000509113
selenoprotein H	VaccDscaff2-snap-gene-110.28	Initial_vs_Flower_bud	-4.04448	down	0.0003	0.00255629
GDP-D-mannose 3',5'-epimerase	VaccDscaff4-augustus-gene-58.31	Initial_vs_Flower_bud	-4.03273	down	5e-05	0.000509113
dormancy-associated protein-like 1	VaccDscaff4-snap-gene-234.32	Initial_vs_Flower_bud	-4.0177	down	5e-05	0.000509113
exocyst subunit exo70 family protein A1	VaccDscaff48-snap-gene-39.49	Initial_vs_Flower_bud	-3.99387	down	5e-05	0.000509113
Nucleotide-diphospho-sugar transferases superfamily protein	VaccDscaff91-augustus-gene-2.23	Initial_vs_Flower_bud	-3.97423	down	0.00125	0.0087766
dynein light chain LC8-type 1	VaccDscaff4-augustus-gene-423.38	Initial_vs_Flower_bud	-3.95939	down	0.0087	0.0434743
neurofilament, medium polypeptide	VaccDscaff24-snap-gene-177.16	Initial_vs_Flower_bud	-3.91579	down	5e-05	0.000509113
heat shock protein 91	VaccDscaff27-processed-gene-314.29	Initial_vs_Flower_bud	-3.90048	down	0.0003	0.00255629
glutathione S-transferase tau 7	VaccDscaff1-snap-gene-116.59	Initial_vs_Flower_bud	-3.89699	down	0.00435	0.0246889
Ribosomal protein S25 family protein	VaccDscaff2-augustus-gene-427.23	Initial_vs_Flower_bud	-3.88999	down	5e-05	0.000509113
Pentatricopeptide repeat (PPR) superfamily protein	VaccDscaff26-snap-gene-62.54	Initial_vs_Flower_bud	-3.88641	down	5e-05	0.000509113
BTB/POZ domain-containing protein	VaccDscaff28-augustus-gene-40.37	Initial_vs_Flower_bud	-3.86737	down	5e-05	0.000509113
ribosomal protein S27	VaccDscaff4-augustus-gene-251.30	Initial_vs_Flower_bud	-3.85151	down	0.0002	0.00178731
ubiquitin protein ligase E3 component n-recognin 7	VaccDscaff28-snap-gene-19.38	Initial_vs_Flower_bud	-3.84849	down	0.0006	0.00468546
Cystathionine beta-synthase (CBS) protein	VaccDscaff4-augustus-gene-403.18	Initial_vs_Flower_bud	-3.84429	down	0.0082	0.0414109
WRKY family transcription factor	VaccDscaff1090-augustus-gene-0.4	Initial_vs_Flower_bud	-3.82686	down	0.0102	0.0492971
homeobox 12	VaccDscaff39-augustus-gene-174.30	Initial_vs_Flower_bud	-3.79372	down	5e-05	0.000509113
histidine-containing phosphotransmitter 3	VaccDscaff7-augustus-gene-189.30	Initial_vs_Flower_bud	-3.79292	down	0.0037	0.0215877
inositol polyphosphate kinase 2 beta	VaccDscaff4-processed-gene-393.6	Initial_vs_Flower_bud	-3.75525	down	5e-05	0.000509113
Senescence/dehydration-associated protein-like protein	VaccDscaff26-augustus-gene-1.29	Initial_vs_Flower_bud	-3.74098	down	5e-05	0.000509113
Transducin/WD40 repeat-like superfamily protein	VaccDscaff47-processed-gene-168.18	Initial_vs_Flower_bud	-3.73633	down	0.00095	0.00696513
phosphoglucomutase, chloroplastic-like	VaccDscaff29-augustus-gene-74.23	Initial_vs_Flower_bud	-3.70915	down	5e-05	0.000509113
Signal peptidase subunit	VaccDscaff34-snap-gene-162.21	Initial_vs_Flower_bud	-3.69724	down	0.0006	0.00468546
Phosphoinositide-specific phospholipase C family protein	VaccDscaff29-augustus-gene-127.28	Initial_vs_Flower_bud	-3.67957	down	5e-05	0.000509113
RAB GTPASE HOMOLOG B18	VaccDscaff3-snap-gene-234.20	Initial_vs_Flower_bud	-3.67523	down	5e-05	0.000509113
ribosome rescue factor HflX	VaccDscaff12-processed-gene-62.7	Initial_vs_Flower_bud	-3.66571	down	0.00515	0.0283308
meiosis regulator and mRNA stability factor 1	VaccDscaff45-augustus-gene-125.22	Initial_vs_Flower_bud	-3.6554	down	0.0014	0.00964257
NF-X-like 1	VaccDscaff57-processed-gene-3.8	Initial_vs_Flower_bud	-3.65262	down	0.00585	0.0314445
apoptosis antagonizing transcription factor	VaccDscaff4-snap-gene-404.30	Initial_vs_Flower_bud	-3.64571	down	0.00345	0.020355
Chaperone protein htpG family protein	VaccDscaff48-snap-gene-9.41	Initial_vs_Flower_bud	-3.62067	down	5e-05	0.000509113
IQ-domain 14	VaccDscaff28-augustus-gene-2.25	Initial_vs_Flower_bud	-3.60467	down	5e-05	0.000509113
S1FA-like DNA-binding protein	VaccDscaff1-snap-gene-180.21	Initial_vs_Flower_bud	-3.59855	down	0.0001	0.000960986
cytochrome C oxidase 6B	VaccDscaff28-snap-gene-54.29	Initial_vs_Flower_bud	-3.56288	down	0.0067	0.035103
Cation efflux family protein	VaccDscaff6-augustus-gene-3.29	Initial_vs_Flower_bud	-3.5346	down	0.00015	0.00138565
WD-40 repeat family protein / notchless protein	VaccDscaff577-augustus-gene-0.10	Initial_vs_Flower_bud	-3.50729	down	0.00025	0.00217815
ethylene-responsive element binding protein	VaccDscaff1-augustus-gene-24.34	Initial_vs_Flower_bud	-3.50714	down	5e-05	0.000509113
flap endonuclease 1-like	VaccDscaff34-augustus-gene-194.18	Initial_vs_Flower_bud	-3.47647	down	5e-05	0.000509113
tankyrase	VaccDscaff24-augustus-gene-345.24	Initial_vs_Flower_bud	-3.47583	down	0.0024	0.0150115
Auxin-responsive GH3 family protein	VaccDscaff1050-augustus-gene-0.2	Initial_vs_Flower_bud	-3.4429	down	5e-05	0.000509113
acyl-CoA dehydrogenase-like protein	VaccDscaff1-augustus-gene-25.26	Initial_vs_Flower_bud	-3.43818	down	5e-05	0.000509113
polyprotein	VaccDscaff35-snap-gene-155.26	Initial_vs_Flower_bud	-3.43283	down	0.0002	0.00178731
heat shock transcription factor A8	VaccDscaff28-augustus-gene-174.16	Initial_vs_Flower_bud	-3.42351	down	0.009	0.0446415
basic helix-loop-helix (bHLH) DNA-binding superfamily protein	VaccDscaff3-augustus-gene-14.34	Initial_vs_Flower_bud	-3.41892	down	5e-05	0.000509113
60S acidic ribosomal protein family	VaccDscaff48-augustus-gene-104.41	Initial_vs_Flower_bud	-3.41642	down	0.0004	0.00328645
manganese tracking factor for mitochondrial SOD2	VaccDscaff48-snap-gene-99.30	Initial_vs_Flower_bud	-3.40176	down	5e-05	0.000509113
Integrase-type DNA-binding superfamily protein	VaccDscaff28-processed-gene-109.4	Initial_vs_Flower_bud	-3.39355	down	5e-05	0.000509113
Heavy metal transport/detoxification superfamily protein	VaccDscaff3-augustus-gene-351.19	Initial_vs_Flower_bud	-3.36954	down	5e-05	0.000509113
cytochrome P450 714C2-like	VaccDscaff47-augustus-gene-126.34	Initial_vs_Flower_bud	-3.35229	down	0.00085	0.00632968
aspartic proteinase A1	VaccDscaff3-processed-gene-63.7	Initial_vs_Flower_bud	-3.33873	down	0.0001	0.000960986
SHAGGY-related protein kinase dZeta	VaccDscaff39-augustus-gene-236.22	Initial_vs_Flower_bud	-3.29774	down	5e-05	0.000509113
two-component response regulator-like protein	VaccDscaff29-snap-gene-26.32	Initial_vs_Flower_bud	-3.26779	down	5e-05	0.000509113
early nodulin-like protein 2	VaccDscaff1-snap-gene-417.31	Initial_vs_Flower_bud	-3.25698	down	0.002	0.0128861
aminoalcoholphosphotransferase	VaccDscaff3-augustus-gene-157.13	Initial_vs_Flower_bud	-3.25011	down	0.00305	0.018373
Homeodomain-like superfamily protein	VaccDscaff24-augustus-gene-157.24	Initial_vs_Flower_bud	-3.2262	down	5e-05	0.000509113
Homeobox-leucine zipper family protein / lipid-binding START domain-containing protein	VaccDscaff47-augustus-gene-75.30	Initial_vs_Flower_bud	-3.19975	down	0.0066	0.0346654
deoxycytidine kinase	VaccDscaff6-augustus-gene-185.16	Initial_vs_Flower_bud	-3.17235	down	0.00385	0.0222963
GATA transcription factor 4	VaccDscaff23-augustus-gene-138.22	Initial_vs_Flower_bud	-3.16872	down	5e-05	0.000509113
Alternative oxidase family protein	VaccDscaff15-augustus-gene-206.20	Initial_vs_Flower_bud	-3.14458	down	5e-05	0.000509113
putative sulfur oxido-reductase	VaccDscaff30-processed-gene-318.5	Initial_vs_Flower_bud	-3.14386	down	5e-05	0.000509113
transmembrane protein 209	VaccDscaff15-snap-gene-290.35	Initial_vs_Flower_bud	-3.13876	down	0.00045	0.00364749
translocon at the outer envelope membrane of chloroplasts 75-III	VaccDscaff24-augustus-gene-78.31	Initial_vs_Flower_bud	-3.1191	down	5e-05	0.000509113
mitochondrial ribosomal protein L47	VaccDscaff9-processed-gene-345.0	Initial_vs_Flower_bud	-3.1137	down	0.00015	0.00138565
calcium-dependent protein kinase 2	VaccDscaff2-augustus-gene-171.24	Initial_vs_Flower_bud	-3.11347	down	5e-05	0.000509113
lysophosphatidyl acyltransferase 4	VaccDscaff23-augustus-gene-336.20	Initial_vs_Flower_bud	-3.11206	down	5e-05	0.000509113
ribosomal protein S25	VaccDscaff42-augustus-gene-186.41	Initial_vs_Flower_bud	-3.11176	down	0.00935	0.045984
growth-regulating factor 12-like	VaccDscaff41-augustus-gene-161.25	Initial_vs_Flower_bud	-3.11023	down	5e-05	0.000509113
mitochondrial acyl carrier protein 2	VaccDscaff17-snap-gene-203.40	Initial_vs_Flower_bud	-3.10799	down	0.00765	0.0391281
6-phosphogluconolactonase 1	VaccDscaff3-augustus-gene-123.18	Initial_vs_Flower_bud	-3.10271	down	0.0027	0.0165756
SKI/DACH domain protein	VaccDscaff42-augustus-gene-221.34	Initial_vs_Flower_bud	-3.09152	down	0.0075	0.0385183
B-S glucosidase 44	VaccDscaff34-augustus-gene-289.31	Initial_vs_Flower_bud	-3.09032	down	0.00085	0.00632968
Drug/metabolite transporter superfamily protein	VaccDscaff24-snap-gene-287.26	Initial_vs_Flower_bud	-3.08614	down	0.0006	0.00468546
DNA double-strand break repair RAD50 ATPase	VaccDscaff39-augustus-gene-153.23	Initial_vs_Flower_bud	-3.0759	down	0.0079	0.040162
F-box family protein	VaccDscaff3-snap-gene-182.43	Initial_vs_Flower_bud	-3.05741	down	0.00235	0.0147509
Basal body up regulated gene 22	VaccDscaff293-augustus-gene-0.44	Initial_vs_Flower_bud	-3.05724	down	0.0019	0.0123531
auxin transporter-like protein 5	VaccDscaff14-snap-gene-384.50	Initial_vs_Flower_bud	-3.05069	down	5e-05	0.000509113
SNF2 domain-containing protein / helicase domain-containing protein / zinc finger protein-like protein	VaccDscaff4-snap-gene-193.19	Initial_vs_Flower_bud	-3.05018	down	0.005	0.0276481
Zinc finger (C2H2 type) family protein / transcription factor jumonji (jmj) family protein	VaccDscaff29-augustus-gene-174.12	Initial_vs_Flower_bud	-3.04718	down	5e-05	0.000509113
x-ray induced transcript 1	VaccDscaff28-augustus-gene-159.24	Initial_vs_Flower_bud	-3.04584	down	0.00515	0.0283308
ribosomal protein L18	VaccDscaff51-snap-gene-10.46	Initial_vs_Flower_bud	-3.03078	down	5e-05	0.000509113
CCCH-type zinc finger family protein	VaccDscaff42-augustus-gene-265.20	Initial_vs_Flower_bud	-3.0305	down	5e-05	0.000509113
Disease resistance-responsive (dirigent-like protein) family protein	VaccDscaff39-processed-gene-277.6	Initial_vs_Flower_bud	-3.01474	down	0.004	0.0230233
BAK1-interacting receptor-like kinase 1	VaccDscaff47-augustus-gene-131.25	Initial_vs_Flower_bud	-2.99651	down	0.00035	0.00292308
protodermal factor 1	VaccDscaff39-processed-gene-213.0	Initial_vs_Flower_bud	-2.98437	down	5e-05	0.000509113
Ribosomal L28e protein family	VaccDscaff34-augustus-gene-24.33	Initial_vs_Flower_bud	-2.981	down	0.00235	0.0147509
calmodulin-binding receptor-like cytoplasmic kinase 1	VaccDscaff47-augustus-gene-107.36	Initial_vs_Flower_bud	-2.97516	down	0.00055	0.00434745
adenine phosphoribosyltransferase 5	VaccDscaff28-snap-gene-83.32	Initial_vs_Flower_bud	-2.9745	down	0.0022	0.0139552
Integrase-type DNA-binding superfamily protein	VaccDscaff1268-augustus-gene-0.4	Initial_vs_Flower_bud	-2.95893	down	0.00225	0.0142218
Ribosomal L29 family protein	VaccDscaff29-augustus-gene-221.30	Initial_vs_Flower_bud	-2.94218	down	5e-05	0.000509113
putative FAD-dependent oxidoreductase	VaccDscaff18-augustus-gene-236.22	Initial_vs_Flower_bud	-2.92461	down	0.00835	0.0420389
ataxin 10	VaccDscaff44-augustus-gene-138.24	Initial_vs_Flower_bud	-2.91665	down	0.00335	0.0198581
Protein kinase superfamily protein	VaccDscaff48-augustus-gene-27.22	Initial_vs_Flower_bud	-2.90755	down	5e-05	0.000509113
F-box family protein	VaccDscaff3-processed-gene-127.2	Initial_vs_Flower_bud	-2.90319	down	0.00675	0.035322
DnaJ / Sec63 Brl domains-containing protein	VaccDscaff37-processed-gene-72.25	Initial_vs_Flower_bud	-2.88735	down	0.0064	0.0337963
nodulin MtN21 /EamA-like transporter family protein	VaccDscaff23-augustus-gene-47.41	Initial_vs_Flower_bud	-2.88199	down	5e-05	0.000509113
polyglutamine binding protein 1	VaccDscaff2-augustus-gene-202.30	Initial_vs_Flower_bud	-2.86556	down	0.00655	0.0344565
Inorganic H pyrophosphatase family protein	VaccDscaff17-augustus-gene-169.23	Initial_vs_Flower_bud	-2.8605	down	0.0009	0.00664913
hydroxyethylthiazole kinase family protein	VaccDscaff3-augustus-gene-329.30	Initial_vs_Flower_bud	-2.85734	down	5e-05	0.000509113
Homeodomain-like superfamily protein	VaccDscaff48-augustus-gene-95.42	Initial_vs_Flower_bud	-2.84178	down	0.0009	0.00664913
squamosa promoter binding protein-like 8	VaccDscaff22-augustus-gene-46.36	Initial_vs_Flower_bud	-2.83794	down	5e-05	0.000509113
VIRB2-interacting protein 1	VaccDscaff23-augustus-gene-95.27	Initial_vs_Flower_bud	-2.83409	down	5e-05	0.000509113
mitochondrion-localized small heat shock protein 23.6	VaccDscaff29-augustus-gene-85.48	Initial_vs_Flower_bud	-2.82827	down	0.0067	0.035103
Pentatricopeptide repeat (PPR-like) superfamily protein	VaccDscaff28-processed-gene-115.2	Initial_vs_Flower_bud	-2.80809	down	0.00105	0.00757987
Lactoylglutathione lyase / glyoxalase I family protein	VaccDscaff47-augustus-gene-133.44	Initial_vs_Flower_bud	-2.80511	down	5e-05	0.000509113
Tyrosine transaminase family protein	VaccDscaff1-augustus-gene-416.35	Initial_vs_Flower_bud	-2.80145	down	0.0019	0.0123531
indole-3-acetic acid inducible 29	VaccDscaff60-augustus-gene-5.35	Initial_vs_Flower_bud	-2.79141	down	0.01005	0.0486971
membrane steroid binding protein 1	VaccDscaff48-augustus-gene-79.37	Initial_vs_Flower_bud	-2.77683	down	0.00765	0.0391281
SSXT family protein	VaccDscaff34-augustus-gene-295.15	Initial_vs_Flower_bud	-2.77199	down	0.00315	0.0188828
Eukaryotic aspartyl protease family protein	VaccDscaff779-augustus-gene-0.7	Initial_vs_Flower_bud	-2.7701	down	5e-05	0.000509113
MATE efflux family protein	VaccDscaff3-snap-gene-104.28	Initial_vs_Flower_bud	-2.75125	down	0.00505	0.0278692
membrane-anchored ubiquitin-fold protein 6 precursor	VaccDscaff23-snap-gene-231.24	Initial_vs_Flower_bud	-2.73199	down	0.00035	0.00292308
Ribosomal protein L39 family protein	VaccDscaff44-augustus-gene-66.25	Initial_vs_Flower_bud	-2.72768	down	5e-05	0.000509113
calcineurin B-like protein 2	VaccDscaff90-augustus-gene-5.67	Initial_vs_Flower_bud	-2.72037	down	0.0084	0.0422447
homeobox-leucine zipper protein HOX32-like	VaccDscaff28-augustus-gene-136.10	Initial_vs_Flower_bud	-2.71984	down	5e-05	0.000509113
linoleate 9S-lipoxygenase-4 protein, putative (DUF581)	VaccDscaff34-augustus-gene-1.28	Initial_vs_Flower_bud	-2.71392	down	0.0002	0.00178731
DNA polymerase epsilon 3, accessory subunit	VaccDscaff24-augustus-gene-119.35	Initial_vs_Flower_bud	-2.71116	down	5e-05	0.000509113
RNA binding motif protein 28	VaccDscaff14-augustus-gene-377.24	Initial_vs_Flower_bud	-2.70552	down	0.0085	0.0426621
Insulinase (Peptidase family M16) family protein	VaccDscaff29-snap-gene-324.37	Initial_vs_Flower_bud	-2.70332	down	0.0057	0.03077
BRISC and BRCA1 A complex member 2	VaccDscaff23-snap-gene-346.28	Initial_vs_Flower_bud	-2.70043	down	0.0003	0.00255629
basic leucine zipper and W2 domains 2	VaccDscaff48-augustus-gene-20.34	Initial_vs_Flower_bud	-2.69168	down	0.00035	0.00292308
Ribosomal protein S3 family protein	VaccDscaff42-snap-gene-219.35	Initial_vs_Flower_bud	-2.68862	down	0.00975	0.047509
HAESA-like 1	VaccDscaff28-processed-gene-283.8	Initial_vs_Flower_bud	-2.68333	down	0.0041	0.0235034
Reticulon family protein	VaccDscaff48-augustus-gene-97.19	Initial_vs_Flower_bud	-2.66189	down	5e-05	0.000509113
metallothionein-like protein 1	VaccDscaff24-augustus-gene-82.33	Initial_vs_Flower_bud	-2.65987	down	5e-05	0.000509113
chitinase domain containing 1	VaccDscaff1440-snap-gene-0.6	Initial_vs_Flower_bud	-2.65519	down	5e-05	0.000509113
two-component response regulator-like PRR95	VaccDscaff48-augustus-gene-104.43	Initial_vs_Flower_bud	-2.64659	down	5e-05	0.000509113
ER membrane protein complex subunit 3	VaccDscaff4-augustus-gene-161.23	Initial_vs_Flower_bud	-2.642	down	5e-05	0.000509113
chaperonin 10	VaccDscaff3-augustus-gene-380.23	Initial_vs_Flower_bud	-2.64187	down	0.0063	0.033355
cationic amino acid transporter 9	VaccDscaff23-augustus-gene-142.24	Initial_vs_Flower_bud	-2.64005	down	0.0015	0.0101994
fructose-2,6-bisphosphatase	VaccDscaff24-snap-gene-68.34	Initial_vs_Flower_bud	-2.63629	down	0.00435	0.0246889
Ribosomal protein L1p/L10e family	VaccDscaff24-snap-gene-118.39	Initial_vs_Flower_bud	-2.63464	down	0.00075	0.00568581
ERF domain protein 12	VaccDscaff4-processed-gene-233.6	Initial_vs_Flower_bud	-2.62507	down	5e-05	0.000509113
checkpoint with forkhead and ring finger domains	VaccDscaff48-snap-gene-22.36	Initial_vs_Flower_bud	-2.61303	down	0.0004	0.00328645
lateral organ boundaries-domain 16	VaccDscaff24-processed-gene-33.4	Initial_vs_Flower_bud	-2.61005	down	5e-05	0.000509113
pentatricopeptide (PPR) repeat-containing protein	VaccDscaff14-augustus-gene-388.30	Initial_vs_Flower_bud	-2.60506	down	0.0055	0.0298735
jumonji domain containing 7	VaccDscaff3-augustus-gene-407.34	Initial_vs_Flower_bud	-2.60076	down	5e-05	0.000509113
Walls Are Thin 1	VaccDscaff18-augustus-gene-20.19	Initial_vs_Flower_bud	-2.60013	down	5e-05	0.000509113
DNA primase subunit 1	VaccDscaff510-augustus-gene-0.9	Initial_vs_Flower_bud	-2.59814	down	0.008	0.0405836
RING/U-box superfamily protein	VaccDscaff4-snap-gene-194.25	Initial_vs_Flower_bud	-2.59328	down	0.009	0.0446415
mitochondrial ribosomal protein L41 L homeolog	VaccDscaff39-snap-gene-83.28	Initial_vs_Flower_bud	-2.58483	down	0.0072	0.0372345
Protein with RNI-like/FBD-like domain	VaccDscaff1-processed-gene-313.11	Initial_vs_Flower_bud	-2.57894	down	0.00245	0.0152794
CYCLIN D3;1	VaccDscaff266-augustus-gene-0.64	Initial_vs_Flower_bud	-2.5736	down	0.00035	0.00292308
CRM family member 3A	VaccDscaff1-augustus-gene-95.16	Initial_vs_Flower_bud	-2.57311	down	0.0092	0.0453884
Transducin/WD40 repeat-like superfamily protein	VaccDscaff29-augustus-gene-5.19	Initial_vs_Flower_bud	-2.56943	down	0.00645	0.0340164
GDSL-like Lipase/Acylhydrolase superfamily protein	VaccDscaff14-augustus-gene-288.27	Initial_vs_Flower_bud	-2.56071	down	5e-05	0.000509113
Cytosol aminopeptidase family protein	VaccDscaff70-augustus-gene-7.66	Initial_vs_Flower_bud	-2.55788	down	5e-05	0.000509113
Heavy metal transport/detoxification superfamily protein	VaccDscaff34-augustus-gene-167.8	Initial_vs_Flower_bud	-2.55642	down	0.00405	0.023265
phosphoenolpyruvate carboxykinase 1	VaccDscaff23-augustus-gene-285.8	Initial_vs_Flower_bud	-2.55291	down	0.0003	0.00255629
AP2/B3-like transcriptional factor family protein	VaccDscaff3-augustus-gene-6.45	Initial_vs_Flower_bud	-2.5482	down	0.0079	0.040162
glutathione S-transferase TAU 18	VaccDscaff3-snap-gene-167.41	Initial_vs_Flower_bud	-2.5434	down	5e-05	0.000509113
ATP synthase D chain	VaccDscaff47-augustus-gene-81.36	Initial_vs_Flower_bud	-2.5347	down	0.0064	0.0337963
Seven transmembrane MLO family protein	VaccDscaff47-snap-gene-127.36	Initial_vs_Flower_bud	-2.53064	down	0.00185	0.0120815
glutathione peroxidase 6	VaccDscaff43-augustus-gene-247.26	Initial_vs_Flower_bud	-2.52975	down	5e-05	0.000509113
FKBP-like peptidyl-prolyl cis-trans isomerase family protein	VaccDscaff29-augustus-gene-80.32	Initial_vs_Flower_bud	-2.52862	down	0.0014	0.00964257
WPP domain interacting protein 2	VaccDscaff90-augustus-gene-2.20	Initial_vs_Flower_bud	-2.51508	down	0.0022	0.0139552
Thioredoxin superfamily protein	VaccDscaff29-processed-gene-233.16	Initial_vs_Flower_bud	-2.51328	down	0.0002	0.00178731
basic helix-loop-helix (bHLH) DNA-binding superfamily protein	VaccDscaff66-augustus-gene-0.18	Initial_vs_Flower_bud	-2.50889	down	5e-05	0.000509113
glutamine-rich protein 23	VaccDscaff774-processed-gene-0.2	Initial_vs_Flower_bud	-2.49765	down	0.0047	0.0262955
Photosystem II reaction center PsbP family protein	VaccDscaff30-augustus-gene-256.32	Initial_vs_Flower_bud	-2.49415	down	0.0006	0.00468546
Heavy metal transport/detoxification superfamily protein	VaccDscaff39-augustus-gene-93.22	Initial_vs_Flower_bud	-2.4831	down	5e-05	0.000509113
valosin containing protein lysine methyltransferase	VaccDscaff1-processed-gene-337.19	Initial_vs_Flower_bud	-2.47867	down	0.00115	0.00818736
TARGET OF MONOPTEROS 6	VaccDscaff47-augustus-gene-82.20	Initial_vs_Flower_bud	-2.47863	down	5e-05	0.000509113
two pore calcium channel protein 1A	VaccDscaff37-snap-gene-50.46	Initial_vs_Flower_bud	-2.47699	down	5e-05	0.000509113
plant intracellular Ras-group-related LRR protein 7-like	VaccDscaff4-augustus-gene-352.30	Initial_vs_Flower_bud	-2.47095	down	0.00045	0.00364749
UPF0497 membrane protein 16	VaccDscaff6-augustus-gene-41.33	Initial_vs_Flower_bud	-2.46427	down	5e-05	0.000509113
LOB domain-containing protein 25	VaccDscaff30-snap-gene-343.78	Initial_vs_Flower_bud	-2.44014	down	5e-05	0.000509113
translin associated factor X	VaccDscaff48-snap-gene-12.15	Initial_vs_Flower_bud	-2.43488	down	0.00735	0.0378737
nicotianamine synthase-like	VaccDscaff3-augustus-gene-74.34	Initial_vs_Flower_bud	-2.43391	down	0.0072	0.0372345
MEI2-like protein 5	VaccDscaff44-augustus-gene-157.25	Initial_vs_Flower_bud	-2.42708	down	0.0022	0.0139552
probable aquaporin PIP1-2	VaccDscaff23-augustus-gene-103.24	Initial_vs_Flower_bud	-2.42605	down	0.0005	0.00400018
U2 small nuclear riboprotein auxiliary factor 50	VaccDscaff9-snap-gene-48.33	Initial_vs_Flower_bud	-2.42152	down	5e-05	0.000509113
SPX domain-containing protein 4	VaccDscaff30-augustus-gene-325.30	Initial_vs_Flower_bud	-2.41657	down	0.00095	0.00696513
alpha/beta-Hydrolases superfamily protein	VaccDscaff17-augustus-gene-191.23	Initial_vs_Flower_bud	-2.41064	down	5e-05	0.000509113
carbonic anhydrase 1	VaccDscaff34-snap-gene-101.28	Initial_vs_Flower_bud	-2.41001	down	5e-05	0.000509113
LAS1 like ribosome biogenesis factor	VaccDscaff37-augustus-gene-182.33	Initial_vs_Flower_bud	-2.39677	down	0.0018	0.0118272
DNA-directed RNA polymerases I, II, and III subunit RPABC5	VaccDscaff43-augustus-gene-232.28	Initial_vs_Flower_bud	-2.39268	down	0.0087	0.0434743
cyclin-dependent kinase inhibitor 5-like	VaccDscaff3-augustus-gene-340.21	Initial_vs_Flower_bud	-2.38408	down	0.00325	0.0193808
F-box and leucine-rich repeat protein 20	VaccDscaff4-augustus-gene-245.28	Initial_vs_Flower_bud	-2.38253	down	0.00855	0.0428607
TCP family transcription factor	VaccDscaff3-snap-gene-43.34	Initial_vs_Flower_bud	-2.38131	down	0.00295	0.017862
Transmembrane proteins 14C	VaccDscaff4-augustus-gene-327.27	Initial_vs_Flower_bud	-2.37938	down	5e-05	0.000509113
glutamate decarboxylase	VaccDscaff28-processed-gene-159.6	Initial_vs_Flower_bud	-2.36546	down	0.0005	0.00400018
CBS / octicosapeptide/Phox/Bemp1 (PB1) domains-containing protein	VaccDscaff42-augustus-gene-58.37	Initial_vs_Flower_bud	-2.35496	down	5e-05	0.000509113
glutathione peroxidase 7	VaccDscaff28-snap-gene-71.29	Initial_vs_Flower_bud	-2.35418	down	0.001	0.0072762
Replication factor-A protein 1-like protein	VaccDscaff3-snap-gene-402.38	Initial_vs_Flower_bud	-2.35196	down	0.001	0.0072762
ABI five binding protein	VaccDscaff28-augustus-gene-258.23	Initial_vs_Flower_bud	-2.34437	down	5e-05	0.000509113
ganglioside induced differentiation associated protein 2	VaccDscaff29-augustus-gene-311.43	Initial_vs_Flower_bud	-2.33983	down	5e-05	0.000509113
expansin A1	VaccDscaff3-processed-gene-159.7	Initial_vs_Flower_bud	-2.33831	down	0.0002	0.00178731
Phototropic-responsive NPH3 family protein	VaccDscaff4-augustus-gene-194.21	Initial_vs_Flower_bud	-2.33412	down	5e-05	0.000509113
atypical CYS HIS rich thioredoxin 4	VaccDscaff1-augustus-gene-314.24	Initial_vs_Flower_bud	-2.33042	down	5e-05	0.000509113
WRKY DNA-binding protein 21	VaccDscaff47-snap-gene-167.28	Initial_vs_Flower_bud	-2.32761	down	0.00145	0.00992179
Vacuolar sorting protein 39	VaccDscaff28-processed-gene-104.1	Initial_vs_Flower_bud	-2.31241	down	0.0001	0.000960986
thiamine thiazole synthase 1, chloroplastic-like	VaccDscaff3-augustus-gene-162.21	Initial_vs_Flower_bud	-2.31182	down	5e-05	0.000509113
calmodulin-domain protein kinase cdpk	VaccDscaff29-snap-gene-215.39	Initial_vs_Flower_bud	-2.30322	down	0.0052	0.0285584
Ribosomal protein L6 family protein	VaccDscaff18-snap-gene-134.31	Initial_vs_Flower_bud	-2.3001	down	0.00885	0.0440403
DnaJ heat shock protein family (Hsp40) member C28	VaccDscaff29-snap-gene-229.28	Initial_vs_Flower_bud	-2.29778	down	0.0103	0.0496922
chlorophyll a-b binding protein 40, chloroplastic	VaccDscaff23-processed-gene-152.8	Initial_vs_Flower_bud	-2.29585	down	0.0038	0.0220507
putative anionic nitroalkane monoxygenase	VaccDscaff3-augustus-gene-32.22	Initial_vs_Flower_bud	-2.28823	down	0.0019	0.0123531
chitinase	VaccDscaff42-augustus-gene-213.43	Initial_vs_Flower_bud	-2.2848	down	0.00265	0.0163189
EARLY FLOWERING-like protein (DUF1313)	VaccDscaff29-processed-gene-127.7	Initial_vs_Flower_bud	-2.27942	down	0.00145	0.00992179
lipid phosphate phosphatase 3	VaccDscaff28-augustus-gene-208.30	Initial_vs_Flower_bud	-2.27863	down	0.00475	0.0265277
Galactose oxidase/kelch repeat superfamily protein	VaccDscaff3-processed-gene-360.19	Initial_vs_Flower_bud	-2.27523	down	0.00815	0.0412057
leucine-rich repeat transmembrane protein kinase family protein	VaccDscaff28-augustus-gene-212.24	Initial_vs_Flower_bud	-2.26961	down	5e-05	0.000509113
probable pyruvate, phosphate dikinase regulatory protein, chloroplastic	VaccDscaff24-snap-gene-192.22	Initial_vs_Flower_bud	-2.26044	down	0.00455	0.0256318
DNA-binding storekeeper protein-related transcriptional regulator	VaccDscaff19-processed-gene-257.1	Initial_vs_Flower_bud	-2.2548	down	0.00845	0.0424535
beta-amylase 1	VaccDscaff3-augustus-gene-324.33	Initial_vs_Flower_bud	-2.24987	down	5e-05	0.000509113
Calcium-binding EF-hand family protein	VaccDscaff29-processed-gene-81.0	Initial_vs_Flower_bud	-2.24034	down	0.0008	0.00600935
AP2/B3-like transcriptional factor family protein	VaccDscaff33-snap-gene-65.35	Initial_vs_Flower_bud	-2.23177	down	0.0011	0.00788288
cofactor of nitrate reductase and xanthine dehydrogenase 3	VaccDscaff39-augustus-gene-165.29	Initial_vs_Flower_bud	-2.23061	down	0.0011	0.00788288
proline extensin-like receptor kinase 1	VaccDscaff69-snap-gene-6.52	Initial_vs_Flower_bud	-2.22407	down	0.00115	0.00818736
Ribosomal protein S3 family protein	VaccDscaff29-augustus-gene-7.47	Initial_vs_Flower_bud	-2.22338	down	5e-05	0.000509113
rubisco accumulation factor-like protein	VaccDscaff34-snap-gene-294.44	Initial_vs_Flower_bud	-2.22001	down	0.00095	0.00696513
hypothetical protein (DUF581)	VaccDscaff3-augustus-gene-359.30	Initial_vs_Flower_bud	-2.21818	down	0.00015	0.00138565
Papain family cysteine protease	VaccDscaff48-augustus-gene-48.25	Initial_vs_Flower_bud	-2.21698	down	5e-05	0.000509113
actin-related protein 9	VaccDscaff1-augustus-gene-107.23	Initial_vs_Flower_bud	-2.21643	down	0.00765	0.0391281
myb domain protein 23	VaccDscaff91-augustus-gene-0.27	Initial_vs_Flower_bud	-2.21572	down	0.00255	0.015794
plastid-specific 50S ribosomal protein 6	VaccDscaff18-augustus-gene-48.31	Initial_vs_Flower_bud	-2.21553	down	5e-05	0.000509113
RNA-binding CRS1 / YhbY (CRM) domain protein	VaccDscaff3-processed-gene-34.6	Initial_vs_Flower_bud	-2.2149	down	5e-05	0.000509113
S-adenosyl-L-methionine-dependent methyltransferases superfamily protein	VaccDscaff4-snap-gene-342.30	Initial_vs_Flower_bud	-2.21247	down	0.00815	0.0412057
ubiquitin carboxyl-terminal hydrolase	VaccDscaff9-augustus-gene-398.34	Initial_vs_Flower_bud	-2.21106	down	5e-05	0.000509113
nuclear factor Y, subunit A3	VaccDscaff29-augustus-gene-6.15	Initial_vs_Flower_bud	-2.20517	down	0.0024	0.0150115
Mitochondrial substrate carrier family protein	VaccDscaff41-augustus-gene-227.48	Initial_vs_Flower_bud	-2.20194	down	5e-05	0.000509113
50S ribosomal protein L4, chloroplastic	VaccDscaff47-augustus-gene-108.30	Initial_vs_Flower_bud	-2.20089	down	0.0049	0.0272038
Immunoglobulin E-set superfamily protein	VaccDscaff47-augustus-gene-156.45	Initial_vs_Flower_bud	-2.1993	down	0.0008	0.00600935
probable protein phosphatase 2C 71	VaccDscaff34-snap-gene-232.51	Initial_vs_Flower_bud	-2.19886	down	0.00485	0.0269919
myosin 2	VaccDscaff1-augustus-gene-423.37	Initial_vs_Flower_bud	-2.19599	down	0.0022	0.0139552
Cytochrome P450 superfamily protein	VaccDscaff23-augustus-gene-306.35	Initial_vs_Flower_bud	-2.18885	down	0.00035	0.00292308
CXXC motif containing zinc binding protein	VaccDscaff31-augustus-gene-111.32	Initial_vs_Flower_bud	-2.18792	down	0.0006	0.00468546
polyadenylate-binding protein 2-binding protein	VaccDscaff15-snap-gene-356.46	Initial_vs_Flower_bud	-2.18578	down	0.0006	0.00468546
nucleotide-sensitive chloride conductance regulator (ICln) family protein	VaccDscaff29-augustus-gene-81.33	Initial_vs_Flower_bud	-2.17997	down	0.0016	0.0107463
Ribosomal L29e protein family	VaccDscaff4-augustus-gene-31.49	Initial_vs_Flower_bud	-2.17619	down	0.0012	0.00848185
complex 1 protein, LYR family protein	VaccDscaff3-augustus-gene-14.35	Initial_vs_Flower_bud	-2.17307	down	5e-05	0.000509113
Leucine-rich receptor-like protein kinase family protein	VaccDscaff1249-augustus-gene-0.3	Initial_vs_Flower_bud	-2.15897	down	5e-05	0.000509113
HVA22 homologue D	VaccDscaff50-snap-gene-6.36	Initial_vs_Flower_bud	-2.15818	down	5e-05	0.000509113
PGR5-LIKE A	VaccDscaff46-snap-gene-11.33	Initial_vs_Flower_bud	-2.15789	down	5e-05	0.000509113
CP12 domain-containing protein 2	VaccDscaff47-snap-gene-193.48	Initial_vs_Flower_bud	-2.15727	down	0.0004	0.00328645
suppressor	VaccDscaff48-processed-gene-15.8	Initial_vs_Flower_bud	-2.15669	down	0.0016	0.0107463
PDS5 cohesin associated factor A	VaccDscaff28-snap-gene-65.21	Initial_vs_Flower_bud	-2.15433	down	5e-05	0.000509113
basic helix-loop-helix (bHLH) DNA-binding superfamily protein	VaccDscaff1-augustus-gene-430.46	Initial_vs_Flower_bud	-2.15282	down	0.0005	0.00400018
nuclease	VaccDscaff60-processed-gene-9.5	Initial_vs_Flower_bud	-2.14562	down	0.00245	0.0152794
transcription factor CSA-like	VaccDscaff29-augustus-gene-286.29	Initial_vs_Flower_bud	-2.14289	down	5e-05	0.000509113
heat shock protein nuclear import factor hikeshi	VaccDscaff42-augustus-gene-36.28	Initial_vs_Flower_bud	-2.13958	down	0.0085	0.0426621
enhancer of polycomb homolog 2	VaccDscaff3-processed-gene-57.9	Initial_vs_Flower_bud	-2.13844	down	0.0078	0.0397474
trehalose phosphatase/synthase 5	VaccDscaff46-augustus-gene-60.18	Initial_vs_Flower_bud	-2.13819	down	5e-05	0.000509113
bifunctional nitrilase/nitrile hydratase NIT4A	VaccDscaff47-snap-gene-47.56	Initial_vs_Flower_bud	-2.13723	down	0.00835	0.0420389
solute carrier family 25 member 44	VaccDscaff36-processed-gene-9.9	Initial_vs_Flower_bud	-2.13453	down	0.00925	0.0455824
CURVATURE THYLAKOID 1D-like protein	VaccDscaff39-augustus-gene-72.25	Initial_vs_Flower_bud	-2.13294	down	0.0043	0.024449
exosome component 1	VaccDscaff34-augustus-gene-241.24	Initial_vs_Flower_bud	-2.13012	down	5e-05	0.000509113
signal peptide peptidase-like 4	VaccDscaff41-augustus-gene-171.16	Initial_vs_Flower_bud	-2.11942	down	5e-05	0.000509113
transportin-1-like	VaccDscaff41-augustus-gene-278.52	Initial_vs_Flower_bud	-2.10557	down	5e-05	0.000509113
DNA repair and meiosis protein (Mre11)	VaccDscaff1-snap-gene-424.56	Initial_vs_Flower_bud	-2.09941	down	0.0001	0.000960986
Glycosyl hydrolase family 85	VaccDscaff29-snap-gene-120.28	Initial_vs_Flower_bud	-2.09692	down	0.00015	0.00138565
B-box type zinc finger protein with CCT domain-containing protein	VaccDscaff3-processed-gene-344.21	Initial_vs_Flower_bud	-2.09668	down	0.00245	0.0152794
CASP-like protein 2B1	VaccDscaff112-processed-gene-1.10	Initial_vs_Flower_bud	-2.09452	down	5e-05	0.000509113
Calcium-dependent lipid-binding (CaLB domain) family protein	VaccDscaff39-augustus-gene-37.27	Initial_vs_Flower_bud	-2.09252	down	0.00085	0.00632968
APO RNA-binding protein (DUF794)	VaccDscaff23-augustus-gene-21.21	Initial_vs_Flower_bud	-2.08921	down	0.00835	0.0420389
homeobox protein 21	VaccDscaff42-augustus-gene-84.31	Initial_vs_Flower_bud	-2.08181	down	5e-05	0.000509113
DWD (DDB1-binding WD40 protein) hypersensitive to ABA 1	VaccDscaff29-snap-gene-5.23	Initial_vs_Flower_bud	-2.07606	down	0.00035	0.00292308
Kelch repeat-containing F-box family protein	VaccDscaff17-augustus-gene-361.36	Initial_vs_Flower_bud	-2.07492	down	5e-05	0.000509113
Small nuclear ribonucleoprotein family protein	VaccDscaff47-augustus-gene-177.32	Initial_vs_Flower_bud	-2.07457	down	0.00015	0.00138565
Diacylglycerol kinase family protein	VaccDscaff1145-snap-gene-0.13	Initial_vs_Flower_bud	-2.07177	down	0.00015	0.00138565
putative quinone oxidoreductase 1	VaccDscaff29-augustus-gene-89.28	Initial_vs_Flower_bud	-2.06966	down	5e-05	0.000509113
basic helix-loop-helix (bHLH) DNA-binding superfamily protein	VaccDscaff28-augustus-gene-231.17	Initial_vs_Flower_bud	-2.06892	down	0.00285	0.0173568
Zinc finger C-x8-C-x5-C-x3-H type family protein	VaccDscaff95-augustus-gene-5.51	Initial_vs_Flower_bud	-2.05845	down	5e-05	0.000509113
Leucine-rich receptor-like protein kinase family protein	VaccDscaff4-augustus-gene-131.32	Initial_vs_Flower_bud	-2.05495	down	5e-05	0.000509113
asterix-like protein	VaccDscaff4-snap-gene-352.36	Initial_vs_Flower_bud	-2.05337	down	0.0018	0.0118272
Calcium-dependent lipid-binding (CaLB domain) family protein	VaccDscaff28-augustus-gene-191.29	Initial_vs_Flower_bud	-2.05303	down	0.0001	0.000960986
NAD(P)H-quinone oxidoreductase subunit S	VaccDscaff28-processed-gene-17.19	Initial_vs_Flower_bud	-2.05268	down	5e-05	0.000509113
GW repeat- and PHD finger-containing protein NERD	VaccDscaff23-snap-gene-2.32	Initial_vs_Flower_bud	-2.05231	down	5e-05	0.000509113
Rhodanese/Cell cycle control phosphatase superfamily protein	VaccDscaff29-snap-gene-338.34	Initial_vs_Flower_bud	-2.04646	down	0.00775	0.0395426
RNA binding (RRM/RBD/RNP motifs) family protein	VaccDscaff47-snap-gene-91.35	Initial_vs_Flower_bud	-2.04382	down	0.00035	0.00292308
Tetratricopeptide repeat (TPR)-like superfamily protein	VaccDscaff3-augustus-gene-426.22	Initial_vs_Flower_bud	-2.04283	down	0.0088	0.0438342
squamosa promoter-binding-like protein 12	VaccDscaff3-augustus-gene-197.26	Initial_vs_Flower_bud	-2.03957	down	5e-05	0.000509113
Neutral/alkaline non-lysosomal ceramidase	VaccDscaff34-augustus-gene-256.30	Initial_vs_Flower_bud	-2.03918	down	5e-05	0.000509113
O-Glycosyl hydrolases family 17 protein	VaccDscaff23-augustus-gene-65.28	Initial_vs_Flower_bud	-2.03839	down	0.0001	0.000960986
myosin heavy chain, cardiac protein	VaccDscaff3-augustus-gene-65.26	Initial_vs_Flower_bud	-2.03308	down	5e-05	0.000509113
Transcriptional coactivator/pterin dehydratase	VaccDscaff29-snap-gene-100.34	Initial_vs_Flower_bud	-2.03197	down	0.0071	0.0368217
abhydrolase domain containing 17A, depalmitoylase	VaccDscaff7-processed-gene-401.4	Initial_vs_Flower_bud	-2.02299	down	5e-05	0.000509113
Subtilase family protein	VaccDscaff37-augustus-gene-101.21	Initial_vs_Flower_bud	-2.02274	down	0.00045	0.00364749
E3 ubiquitin-protein ligase DIS1-like	VaccDscaff562-augustus-gene-0.15	Initial_vs_Flower_bud	-2.02219	down	5e-05	0.000509113
photosystem I subunit l	VaccDscaff47-augustus-gene-133.40	Initial_vs_Flower_bud	-2.01951	down	5e-05	0.000509113
F-box family protein	VaccDscaff24-augustus-gene-215.16	Initial_vs_Flower_bud	-2.01897	down	0.0001	0.000960986
methyltransferase like 16	VaccDscaff14-snap-gene-384.49	Initial_vs_Flower_bud	-2.01483	down	0.00065	0.00502564
anaphase-promoting complex subunit	VaccDscaff3-snap-gene-211.23	Initial_vs_Flower_bud	-2.01446	down	0.0002	0.00178731
N-acetyl-l-glutamate synthase 2	VaccDscaff32-snap-gene-269.38	Initial_vs_Flower_bud	-2.0118	down	5e-05	0.000509113
SNF7 family protein	VaccDscaff29-augustus-gene-0.26	Initial_vs_Flower_bud	-2.01004	down	5e-05	0.000509113
2-oxoacid dehydrogenases acyltransferase family protein	VaccDscaff28-augustus-gene-222.24	Initial_vs_Flower_bud	-2.00335	down	0.0067	0.035103
NAD(P)H dehydrogenase (quinone)s	VaccDscaff23-snap-gene-14.45	Initial_vs_Flower_bud	-1.99955	down	0.0031	0.0186275
putative actin cortical patch component Lsb4	VaccDscaff158-augustus-gene-0.18	Initial_vs_Flower_bud	-1.99919	down	0.00135	0.00935942
lysyl-tRNA synthetase 1	VaccDscaff28-snap-gene-90.34	Initial_vs_Flower_bud	-1.9925	down	5e-05	0.000509113
copper-transporting ATPase HMA4-like	VaccDscaff39-augustus-gene-152.18	Initial_vs_Flower_bud	-1.98403	down	5e-05	0.000509113
PSI type II chlorophyll a/b-binding protein (Lhca2*1)	VaccDscaff71-snap-gene-1.49	Initial_vs_Flower_bud	-1.97705	down	0.0006	0.00468546
disproportionating enzyme 2	VaccDscaff29-snap-gene-299.31	Initial_vs_Flower_bud	-1.97698	down	0.0076	0.0389428
small nuclear ribonucleoprotein 13 S homeolog	VaccDscaff23-augustus-gene-30.32	Initial_vs_Flower_bud	-1.97538	down	0.0001	0.000960986
structural maintenance of chromosomes domain protein	VaccDscaff47-augustus-gene-113.18	Initial_vs_Flower_bud	-1.97484	down	5e-05	0.000509113
Rho GTPase activating protein with PAK-box/P21-Rho-binding domain-containing protein	VaccDscaff24-augustus-gene-119.32	Initial_vs_Flower_bud	-1.96829	down	5e-05	0.000509113
60S ribosomal protein L37a-1-like	VaccDscaff3-augustus-gene-363.26	Initial_vs_Flower_bud	-1.96725	down	0.0073	0.0376586
F-box and associated interaction domains-containing protein	VaccDscaff48-processed-gene-61.1	Initial_vs_Flower_bud	-1.96615	down	0.00015	0.00138565
DOF zinc finger protein 1	VaccDscaff496-processed-gene-0.4	Initial_vs_Flower_bud	-1.96584	down	0.0002	0.00178731
mitochondrial import receptor subunit TOM5-like protein	VaccDscaff32-processed-gene-154.11	Initial_vs_Flower_bud	-1.9647	down	0.0033	0.0196304
Pentatricopeptide repeat (PPR) superfamily protein	VaccDscaff42-augustus-gene-224.32	Initial_vs_Flower_bud	-1.95656	down	0.0033	0.0196304
single myb histone 4	VaccDscaff28-snap-gene-206.50	Initial_vs_Flower_bud	-1.95383	down	5e-05	0.000509113
DEGP protease 2	VaccDscaff46-snap-gene-193.35	Initial_vs_Flower_bud	-1.95179	down	0.0018	0.0118272
Ankyrin repeat family protein	VaccDscaff48-augustus-gene-62.47	Initial_vs_Flower_bud	-1.94674	down	0.00135	0.00935942
Eukaryotic aspartyl protease family protein	VaccDscaff3-processed-gene-115.10	Initial_vs_Flower_bud	-1.94512	down	0.0009	0.00664913
myosin-H heavy protein	VaccDscaff42-snap-gene-51.45	Initial_vs_Flower_bud	-1.94335	down	5e-05	0.000509113
C2H2-like zinc finger protein	VaccDscaff34-augustus-gene-304.23	Initial_vs_Flower_bud	-1.94294	down	0.0093	0.0457814
COBW domain containing 1	VaccDscaff4-processed-gene-401.4	Initial_vs_Flower_bud	-1.93939	down	5e-05	0.000509113
RAB GTPase homolog 8A	VaccDscaff47-snap-gene-91.37	Initial_vs_Flower_bud	-1.93729	down	5e-05	0.000509113
ABC-2 type transporter family protein	VaccDscaff39-augustus-gene-134.13	Initial_vs_Flower_bud	-1.93689	down	0.00065	0.00502564
chlorophyllase 2	VaccDscaff4-augustus-gene-54.38	Initial_vs_Flower_bud	-1.93659	down	0.00025	0.00217815
Tetratricopeptide repeat (TPR)-like superfamily protein	VaccDscaff66-augustus-gene-6.25	Initial_vs_Flower_bud	-1.93291	down	5e-05	0.000509113
alpha/beta-Hydrolases superfamily protein	VaccDscaff51-augustus-gene-20.32	Initial_vs_Flower_bud	-1.93157	down	0.0019	0.0123531
RNA recognition motif (RRM)-containing protein	VaccDscaff47-augustus-gene-109.29	Initial_vs_Flower_bud	-1.92648	down	0.00265	0.0163189
MIRO-related GTP-ase 1	VaccDscaff34-augustus-gene-165.18	Initial_vs_Flower_bud	-1.92121	down	0.0002	0.00178731
DNAJ-like 20	VaccDscaff295-augustus-gene-0.43	Initial_vs_Flower_bud	-1.92116	down	0.0042	0.0239796
mediator of cell motility 1	VaccDscaff18-snap-gene-183.37	Initial_vs_Flower_bud	-1.92023	down	0.0001	0.000960986
U6 snRNA biogenesis 1	VaccDscaff45-snap-gene-73.36	Initial_vs_Flower_bud	-1.91933	down	5e-05	0.000509113
HSP20-like chaperones superfamily protein	VaccDscaff29-snap-gene-278.30	Initial_vs_Flower_bud	-1.90962	down	5e-05	0.000509113
CWC15 spliceosome-associated protein S homeolog	VaccDscaff6-augustus-gene-25.44	Initial_vs_Flower_bud	-1.90377	down	5e-05	0.000509113
Ribosomal protein S5/Elongation factor G/III/V family protein	VaccDscaff48-augustus-gene-22.32	Initial_vs_Flower_bud	-1.90325	down	0.00795	0.0403715
Glycolipid transfer protein (GLTP) family protein	VaccDscaff28-snap-gene-137.25	Initial_vs_Flower_bud	-1.89806	down	0.0001	0.000960986
RNI-like superfamily protein	VaccDscaff29-snap-gene-66.50	Initial_vs_Flower_bud	-1.89487	down	0.00095	0.00696513
Ras-related small GTP-binding family protein	VaccDscaff1-augustus-gene-4.37	Initial_vs_Flower_bud	-1.89156	down	0.00395	0.0227778
membrane-associated progesterone binding protein 4	VaccDscaff3-snap-gene-403.40	Initial_vs_Flower_bud	-1.89152	down	5e-05	0.000509113
Leucine-rich repeat protein kinase family protein	VaccDscaff222-snap-gene-0.21	Initial_vs_Flower_bud	-1.88668	down	5e-05	0.000509113
NOC3-like DNA replication regulator	VaccDscaff166-processed-gene-2.23	Initial_vs_Flower_bud	-1.88468	down	5e-05	0.000509113
metal tolerance protein 5-like	VaccDscaff29-augustus-gene-158.19	Initial_vs_Flower_bud	-1.88351	down	0.003	0.0181156
methyl-CPG-binding domain 4	VaccDscaff51-augustus-gene-21.40	Initial_vs_Flower_bud	-1.87781	down	5e-05	0.000509113
Leucine-rich repeat (LRR) family protein	VaccDscaff28-augustus-gene-237.26	Initial_vs_Flower_bud	-1.85644	down	0.00035	0.00292308
deoxycytidine kinase	VaccDscaff37-augustus-gene-97.22	Initial_vs_Flower_bud	-1.85331	down	0.00185	0.0120815
NOC3 like DNA replication regulator	VaccDscaff78-processed-gene-3.19	Initial_vs_Flower_bud	-1.84967	down	0.00575	0.0309915
nuclear RNA polymerase C2	VaccDscaff3-augustus-gene-54.28	Initial_vs_Flower_bud	-1.84876	down	0.00055	0.00434745
Protein kinase superfamily protein	VaccDscaff1-augustus-gene-327.26	Initial_vs_Flower_bud	-1.84831	down	5e-05	0.000509113
transportin 1	VaccDscaff14-augustus-gene-387.43	Initial_vs_Flower_bud	-1.84668	down	0.00025	0.00217815
peroxin 13	VaccDscaff47-augustus-gene-129.29	Initial_vs_Flower_bud	-1.84326	down	5e-05	0.000509113
14-3-3 protein 7	VaccDscaff18-augustus-gene-75.35	Initial_vs_Flower_bud	-1.84281	down	0.00425	0.0242135
Transducin/WD40 repeat-like superfamily protein	VaccDscaff70-snap-gene-5.37	Initial_vs_Flower_bud	-1.84071	down	5e-05	0.000509113
chloroplastidic phosphoglucan, water dikinase (ATGWD3)	VaccDscaff23-snap-gene-78.25	Initial_vs_Flower_bud	-1.83831	down	0.00045	0.00364749
proteasome activating protein 200	VaccDscaff1-snap-gene-459.39	Initial_vs_Flower_bud	-1.83793	down	5e-05	0.000509113
HXXXD-type acyl-transferase family protein	VaccDscaff4-augustus-gene-121.28	Initial_vs_Flower_bud	-1.83651	down	0.00305	0.018373
actin depolymerizing factor 6	VaccDscaff4-augustus-gene-65.47	Initial_vs_Flower_bud	-1.83472	down	0.00015	0.00138565
small ubiquitin-like modifier 2	VaccDscaff47-augustus-gene-145.27	Initial_vs_Flower_bud	-1.83425	down	0.00965	0.0471113
Tetratricopeptide repeat (TPR)-like superfamily protein	VaccDscaff38-processed-gene-279.9	Initial_vs_Flower_bud	-1.83203	down	5e-05	0.000509113
Photosystem II reaction center PsbP family protein	VaccDscaff34-augustus-gene-165.19	Initial_vs_Flower_bud	-1.83096	down	5e-05	0.000509113
GRAM domain family protein	VaccDscaff793-augustus-gene-0.4	Initial_vs_Flower_bud	-1.83063	down	5e-05	0.000509113
myosin 1	VaccDscaff4-snap-gene-246.21	Initial_vs_Flower_bud	-1.82939	down	0.0038	0.0220507
mitogen-activated protein kinase kinase kinase 5	VaccDscaff23-augustus-gene-328.36	Initial_vs_Flower_bud	-1.82898	down	5e-05	0.000509113
dof zinc finger protein 4-like	VaccDscaff24-processed-gene-229.1	Initial_vs_Flower_bud	-1.82598	down	0.01005	0.0486971
Tda3p	VaccDscaff7-augustus-gene-269.16	Initial_vs_Flower_bud	-1.8239	down	5e-05	0.000509113
glycine-rich RNA-binding protein 2	VaccDscaff4-augustus-gene-122.34	Initial_vs_Flower_bud	-1.82363	down	0.00775	0.0395426
PLAC8 family protein	VaccDscaff4-snap-gene-180.31	Initial_vs_Flower_bud	-1.81919	down	0.0074	0.0380901
WD repeat containing antisense to TP53	VaccDscaff4-snap-gene-184.32	Initial_vs_Flower_bud	-1.81892	down	5e-05	0.000509113
Pmr5/Cas1p GDSL/SGNH-like acyl-esterase family protein (DUF828)	VaccDscaff47-processed-gene-111.7	Initial_vs_Flower_bud	-1.81815	down	0.0016	0.0107463
thylakoid lumenal protein (Mog1/PsbP/DUF1795-like photosystem II reaction center PsbP family protein)	VaccDscaff2-augustus-gene-154.23	Initial_vs_Flower_bud	-1.81759	down	0.0042	0.0239796
60S ribosomal protein L13-2	VaccDscaff29-snap-gene-20.41	Initial_vs_Flower_bud	-1.81577	down	5e-05	0.000509113
Concanavalin A-like lectin protein kinase family protein	VaccDscaff47-processed-gene-103.15	Initial_vs_Flower_bud	-1.81514	down	5e-05	0.000509113
vacuolar protein sorting 13 homolog C	VaccDscaff3-snap-gene-363.28	Initial_vs_Flower_bud	-1.8149	down	0.0045	0.0253955
Zinc finger (C3HC4-type RING finger) family protein	VaccDscaff82-augustus-gene-3.26	Initial_vs_Flower_bud	-1.81343	down	0.0013	0.0090707
SNF1-related protein kinase regulatory subunit gamma 1	VaccDscaff4-augustus-gene-382.25	Initial_vs_Flower_bud	-1.81309	down	5e-05	0.000509113
cell division cycle 45	VaccDscaff2-processed-gene-87.11	Initial_vs_Flower_bud	-1.81094	down	0.001	0.0072762
cold-regulated 413-plasma membrane 2	VaccDscaff42-augustus-gene-78.27	Initial_vs_Flower_bud	-1.80861	down	0.00785	0.0399544
Tetratricopeptide repeat (TPR)-like superfamily protein	VaccDscaff44-processed-gene-70.3	Initial_vs_Flower_bud	-1.80787	down	5e-05	0.000509113
BES1/BZR1 homolog 2	VaccDscaff30-augustus-gene-222.17	Initial_vs_Flower_bud	-1.80672	down	5e-05	0.000509113
CAP160 protein	VaccDscaff29-augustus-gene-64.34	Initial_vs_Flower_bud	-1.80401	down	5e-05	0.000509113
FIZZY-related 2	VaccDscaff46-snap-gene-11.32	Initial_vs_Flower_bud	-1.79802	down	5e-05	0.000509113
DNAse I-like superfamily protein	VaccDscaff21-snap-gene-370.38	Initial_vs_Flower_bud	-1.7977	down	0.0003	0.00255629
glycosyl hydrolase 9A1	VaccDscaff34-augustus-gene-198.21	Initial_vs_Flower_bud	-1.79738	down	0.0006	0.00468546
light harvesting complex photosystem II	VaccDscaff34-augustus-gene-269.38	Initial_vs_Flower_bud	-1.794	down	0.001	0.0072762
Cysteine proteinases superfamily protein	VaccDscaff35-snap-gene-207.31	Initial_vs_Flower_bud	-1.79386	down	0.00335	0.0198581
transmembrane protein 245	VaccDscaff1-augustus-gene-453.26	Initial_vs_Flower_bud	-1.79358	down	5e-05	0.000509113
ras-related protein Rab11D	VaccDscaff6-augustus-gene-342.19	Initial_vs_Flower_bud	-1.78968	down	0.00365	0.0213397
Tetratricopeptide repeat (TPR)-like superfamily protein	VaccDscaff34-processed-gene-246.2	Initial_vs_Flower_bud	-1.78963	down	0.0065	0.0342384
RNI-like superfamily protein	VaccDscaff78-augustus-gene-6.68	Initial_vs_Flower_bud	-1.78805	down	0.00025	0.00217815
thionin-like protein	VaccDscaff39-processed-gene-105.15	Initial_vs_Flower_bud	-1.78769	down	0.0001	0.000960986
nucleoporin 62	VaccDscaff22-snap-gene-47.48	Initial_vs_Flower_bud	-1.78347	down	0.00245	0.0152794
putative GTPase-activating protein Gyp7	VaccDscaff29-processed-gene-28.17	Initial_vs_Flower_bud	-1.78191	down	5e-05	0.000509113
phloem protein 2-A12	VaccDscaff19-processed-gene-20.18	Initial_vs_Flower_bud	-1.77947	down	0.00015	0.00138565
bZIP transcription factor 12-like	VaccDscaff2-augustus-gene-371.35	Initial_vs_Flower_bud	-1.77503	down	0.0001	0.000960986
Clathrin light chain protein	VaccDscaff48-augustus-gene-69.30	Initial_vs_Flower_bud	-1.7717	down	5e-05	0.000509113
protein kinase 1B	VaccDscaff47-augustus-gene-94.24	Initial_vs_Flower_bud	-1.7701	down	0.0024	0.0150115
end binding protein 1C	VaccDscaff30-augustus-gene-247.33	Initial_vs_Flower_bud	-1.76994	down	0.0003	0.00255629
signal responsive 1	VaccDscaff39-augustus-gene-86.17	Initial_vs_Flower_bud	-1.76606	down	5e-05	0.000509113
ring finger protein 4	VaccDscaff15-snap-gene-346.48	Initial_vs_Flower_bud	-1.76189	down	0.00335	0.0198581
transducin family protein / WD-40 repeat family protein	VaccDscaff29-augustus-gene-214.25	Initial_vs_Flower_bud	-1.75679	down	0.0005	0.00400018
casein kinase II beta chain 1	VaccDscaff2-augustus-gene-2.24	Initial_vs_Flower_bud	-1.7546	down	5e-05	0.000509113
RING-H2 finger C1A	VaccDscaff47-processed-gene-32.12	Initial_vs_Flower_bud	-1.75401	down	5e-05	0.000509113
Ribosomal protein L1p/L10e family	VaccDscaff23-augustus-gene-194.24	Initial_vs_Flower_bud	-1.75248	down	0.0054	0.0294661
auxin-induced protein 13	VaccDscaff1-snap-gene-141.13	Initial_vs_Flower_bud	-1.75192	down	0.00065	0.00502564
ethylene-responsive transcription factor 4	VaccDscaff42-processed-gene-223.8	Initial_vs_Flower_bud	-1.74806	down	0.0075	0.0385183
nuclear shuttle interacting	VaccDscaff17-augustus-gene-3.25	Initial_vs_Flower_bud	-1.74398	down	5e-05	0.000509113
one helix protein	VaccDscaff17-augustus-gene-55.30	Initial_vs_Flower_bud	-1.74354	down	0.0006	0.00468546
Transducin/WD40 repeat-like superfamily protein	VaccDscaff18-augustus-gene-321.49	Initial_vs_Flower_bud	-1.74262	down	0.0043	0.024449
Nucleoside diphosphate kinase family protein	VaccDscaff28-snap-gene-17.39	Initial_vs_Flower_bud	-1.73676	down	0.00295	0.017862
Leucine-rich receptor-like protein kinase family protein	VaccDscaff91-snap-gene-4.19	Initial_vs_Flower_bud	-1.73205	down	0.00855	0.0428607
evolutionarily conserved C-terminal region 2	VaccDscaff161-snap-gene-2.45	Initial_vs_Flower_bud	-1.73123	down	0.00645	0.0340164
Seven transmembrane MLO family protein	VaccDscaff310-augustus-gene-0.41	Initial_vs_Flower_bud	-1.73065	down	5e-05	0.000509113
WD repeat domain 70	VaccDscaff24-augustus-gene-40.27	Initial_vs_Flower_bud	-1.73027	down	0.00015	0.00138565
40S ribosomal protein S15-like	VaccDscaff4-augustus-gene-60.43	Initial_vs_Flower_bud	-1.71253	down	0.00425	0.0242135
switch 2	VaccDscaff39-snap-gene-251.32	Initial_vs_Flower_bud	-1.71186	down	5e-05	0.000509113
LTV1 ribosome biogenesis factor L homeolog	VaccDscaff23-augustus-gene-352.27	Initial_vs_Flower_bud	-1.71182	down	0.0003	0.00255629
actin-related protein 4	VaccDscaff4-augustus-gene-336.20	Initial_vs_Flower_bud	-1.70995	down	0.00955	0.0467232
CTD (carboxy-terminal domain, RNA polymerase II, polypeptide A) small phosphatase like 2b	VaccDscaff3-augustus-gene-195.23	Initial_vs_Flower_bud	-1.7068	down	5e-05	0.000509113
Ribosomal protein S21e	VaccDscaff47-augustus-gene-185.37	Initial_vs_Flower_bud	-1.70602	down	0.00045	0.00364749
rRNA-processing protein gar2	VaccDscaff29-snap-gene-156.35	Initial_vs_Flower_bud	-1.69244	down	0.0006	0.00468546
Fe superoxide dismutase 3	VaccDscaff42-augustus-gene-176.17	Initial_vs_Flower_bud	-1.68866	down	5e-05	0.000509113
anti- silencing function 1b	VaccDscaff31-snap-gene-18.30	Initial_vs_Flower_bud	-1.68776	down	0.0005	0.00400018
RNA-binding (RRM/RBD/RNP motifs) family protein	VaccDscaff753-augustus-gene-0.15	Initial_vs_Flower_bud	-1.68666	down	5e-05	0.000509113
BEL1-like homeodomain 1	VaccDscaff24-augustus-gene-294.19	Initial_vs_Flower_bud	-1.68343	down	0.0084	0.0422447
Transducin/WD40 repeat-like superfamily protein	VaccDscaff3-snap-gene-35.35	Initial_vs_Flower_bud	-1.68316	down	0.0038	0.0220507
FMN-linked oxidoreductases superfamily protein	VaccDscaff14-snap-gene-381.27	Initial_vs_Flower_bud	-1.66775	down	5e-05	0.000509113
Surfeit locus protein 5 subunit 22 of Mediator complex	VaccDscaff74-augustus-gene-1.19	Initial_vs_Flower_bud	-1.66519	down	5e-05	0.000509113
pectinesterase family protein	VaccDscaff4-processed-gene-359.5	Initial_vs_Flower_bud	-1.66306	down	0.0014	0.00964257
respiratory burst oxidase homolog protein A-like	VaccDscaff28-augustus-gene-35.27	Initial_vs_Flower_bud	-1.66115	down	0.00925	0.0455824
SDE2 telomere maintenance homolog	VaccDscaff22-augustus-gene-6.33	Initial_vs_Flower_bud	-1.6582	down	5e-05	0.000509113
Ankyrin repeat family protein / BTB/POZ domain-containing protein	VaccDscaff30-processed-gene-27.13	Initial_vs_Flower_bud	-1.65435	down	5e-05	0.000509113
Purple acid phosphatases superfamily protein	VaccDscaff4-processed-gene-322.22	Initial_vs_Flower_bud	-1.65114	down	0.0004	0.00328645
Pseudouridine synthase family protein	VaccDscaff34-augustus-gene-183.22	Initial_vs_Flower_bud	-1.64975	down	5e-05	0.000509113
RNA-binding (RRM/RBD/RNP motifs) family protein	VaccDscaff18-processed-gene-119.3	Initial_vs_Flower_bud	-1.63953	down	0.00095	0.00696513
B-box type zinc finger protein with CCT domain-containing protein	VaccDscaff4-augustus-gene-255.24	Initial_vs_Flower_bud	-1.63678	down	0.00255	0.015794
probable glutathione S-transferase DHAR2, chloroplastic	VaccDscaff39-snap-gene-57.45	Initial_vs_Flower_bud	-1.62479	down	5e-05	0.000509113
SNARE associated Golgi protein family	VaccDscaff46-augustus-gene-60.16	Initial_vs_Flower_bud	-1.62327	down	5e-05	0.000509113
eukaryotic translation initiation factor 3C	VaccDscaff18-augustus-gene-323.28	Initial_vs_Flower_bud	-1.62284	down	5e-05	0.000509113
potassium channel tetramerization domain-containing protein / pentapeptide repeat-containing protein	VaccDscaff29-augustus-gene-278.23	Initial_vs_Flower_bud	-1.61768	down	5e-05	0.000509113
Ribosomal protein S26e family protein	VaccDscaff34-processed-gene-98.3	Initial_vs_Flower_bud	-1.61384	down	5e-05	0.000509113
prenylated RAB acceptor 1.A2	VaccDscaff1-augustus-gene-155.27	Initial_vs_Flower_bud	-1.6114	down	0.00275	0.0168337
TRICHOME BIREFRINGENCE-LIKE 11	VaccDscaff24-augustus-gene-24.27	Initial_vs_Flower_bud	-1.61026	down	0.00425	0.0242135
outer envelope pore 21B-like protein	VaccDscaff23-snap-gene-362.47	Initial_vs_Flower_bud	-1.61023	down	0.0001	0.000960986
Rho termination factor	VaccDscaff24-augustus-gene-35.28	Initial_vs_Flower_bud	-1.60828	down	5e-05	0.000509113
aluminum activated malate transporter family protein	VaccDscaff29-augustus-gene-257.30	Initial_vs_Flower_bud	-1.60808	down	0.0047	0.0262955
Transducin/WD40 repeat-like superfamily protein	VaccDscaff23-augustus-gene-315.34	Initial_vs_Flower_bud	-1.60758	down	0.0052	0.0285584
EEIG1/EHBP1 protein amino-terminal domain protein	VaccDscaff42-augustus-gene-221.36	Initial_vs_Flower_bud	-1.60675	down	0.00165	0.0110142
serine/arginine-rich splicing factor RSZ23-like	VaccDscaff3-snap-gene-437.32	Initial_vs_Flower_bud	-1.60617	down	0.00185	0.0120815
RNA-binding CRS1 / YhbY (CRM) domain-containing protein	VaccDscaff1586-snap-gene-0.7	Initial_vs_Flower_bud	-1.60258	down	0.00775	0.0395426
cryptochrome 1	VaccDscaff23-augustus-gene-245.20	Initial_vs_Flower_bud	-1.59593	down	0.00045	0.00364749
Ribosomal protein L35Ae family protein	VaccDscaff48-snap-gene-72.54	Initial_vs_Flower_bud	-1.594	down	0.0006	0.00468546
AAA-type ATPase family protein	VaccDscaff42-augustus-gene-194.34	Initial_vs_Flower_bud	-1.59374	down	0.00025	0.00217815
ubiquitin protein ligase E3 component n-recognin 7 (putative)	VaccDscaff49-snap-gene-25.37	Initial_vs_Flower_bud	-1.5917	down	0.0001	0.000960986
phosphatidylinositol glycan anchor biosynthesis class S	VaccDscaff47-augustus-gene-145.26	Initial_vs_Flower_bud	-1.59141	down	0.0001	0.000960986
plastidic GLC translocator	VaccDscaff18-snap-gene-293.30	Initial_vs_Flower_bud	-1.5902	down	5e-05	0.000509113
31-kDa RNA binding protein	VaccDscaff3-snap-gene-381.19	Initial_vs_Flower_bud	-1.58895	down	0.00415	0.0237389
histone deacetylase 6	VaccDscaff4-snap-gene-373.36	Initial_vs_Flower_bud	-1.58739	down	5e-05	0.000509113
Mitochondrial glycoprotein family protein	VaccDscaff48-augustus-gene-76.40	Initial_vs_Flower_bud	-1.58327	down	0.00095	0.00696513
peptidylprolyl isomerase E (cyclophilin E)	VaccDscaff48-augustus-gene-16.21	Initial_vs_Flower_bud	-1.58254	down	0.00455	0.0256318
translocon outer complex protein 120	VaccDscaff700-processed-gene-0.5	Initial_vs_Flower_bud	-1.58049	down	0.0016	0.0107463
fip1 motif-containing protein	VaccDscaff5-snap-gene-15.48	Initial_vs_Flower_bud	-1.58042	down	5e-05	0.000509113
phosphorylethanolamine cytidylyltransferase 1	VaccDscaff23-augustus-gene-77.29	Initial_vs_Flower_bud	-1.5794	down	0.00035	0.00292308
homolog of X-ray repair cross complementing 2 (XRCC2)	VaccDscaff42-snap-gene-60.40	Initial_vs_Flower_bud	-1.56952	down	5e-05	0.000509113
AGC (cAMP-dependent, cGMP-dependent and protein kinase C) kinase family protein	VaccDscaff44-processed-gene-214.2	Initial_vs_Flower_bud	-1.5658	down	0.00035	0.00292308
F-box/RNI-like/FBD-like domains-containing protein	VaccDscaff39-snap-gene-267.27	Initial_vs_Flower_bud	-1.56518	down	0.00025	0.00217815
POX (plant homeobox) family protein	VaccDscaff34-augustus-gene-250.32	Initial_vs_Flower_bud	-1.56472	down	0.0012	0.00848185
TGF-beta receptor interacting protein 1	VaccDscaff3-augustus-gene-226.27	Initial_vs_Flower_bud	-1.56164	down	5e-05	0.000509113
membrane-associated kinase regulator	VaccDscaff5-processed-gene-57.2	Initial_vs_Flower_bud	-1.55949	down	0.00465	0.0260951
myb-like transcription factor family protein	VaccDscaff51-processed-gene-3.3	Initial_vs_Flower_bud	-1.5579	down	0.00745	0.0383035
Isocitrate/isopropylmalate dehydrogenase family protein	VaccDscaff32-snap-gene-299.39	Initial_vs_Flower_bud	-1.5568	down	5e-05	0.000509113
acidic ribosomal protein P3	VaccDscaff23-augustus-gene-85.30	Initial_vs_Flower_bud	-1.55356	down	5e-05	0.000509113
homeobox protein 6	VaccDscaff39-augustus-gene-82.12	Initial_vs_Flower_bud	-1.55252	down	0.00845	0.0424535
ARM repeat superfamily protein	VaccDscaff1-augustus-gene-4.30	Initial_vs_Flower_bud	-1.55034	down	0.0027	0.0165756
strictosidine synthase-like 3	VaccDscaff47-augustus-gene-38.20	Initial_vs_Flower_bud	-1.54754	down	0.00865	0.0432732
TEOSINTE BRANCHED, cycloidea and PCF (TCP) 14	VaccDscaff42-processed-gene-170.0	Initial_vs_Flower_bud	-1.54665	down	0.00465	0.0260951
exonuclease 3'-5' domain containing 3	VaccDscaff3-snap-gene-76.50	Initial_vs_Flower_bud	-1.54577	down	0.00045	0.00364749
zinc finger protein	VaccDscaff3-augustus-gene-35.28	Initial_vs_Flower_bud	-1.54143	down	5e-05	0.000509113
glutelin type-A 2-like	VaccDscaff3-augustus-gene-40.37	Initial_vs_Flower_bud	-1.54017	down	0.00365	0.0213397
Outward rectifying potassium channel protein	VaccDscaff273-augustus-gene-0.59	Initial_vs_Flower_bud	-1.53725	down	5e-05	0.000509113
periodic tryptophan protein 2	VaccDscaff34-augustus-gene-37.27	Initial_vs_Flower_bud	-1.53148	down	5e-05	0.000509113
ABC-2 type transporter family protein	VaccDscaff29-processed-gene-50.15	Initial_vs_Flower_bud	-1.52898	down	0.00015	0.00138565
HAUS augmin-like complex subunit	VaccDscaff30-snap-gene-318.23	Initial_vs_Flower_bud	-1.52893	down	5e-05	0.000509113
GRAS family transcription factor	VaccDscaff1-processed-gene-160.8	Initial_vs_Flower_bud	-1.5263	down	5e-05	0.000509113
BR-signaling kinase 1	VaccDscaff23-augustus-gene-357.25	Initial_vs_Flower_bud	-1.52584	down	5e-05	0.000509113
farnesylated protein 6	VaccDscaff42-augustus-gene-204.33	Initial_vs_Flower_bud	-1.52235	down	0.0039	0.0225382
glyoxylate reductase 1	VaccDscaff47-snap-gene-127.39	Initial_vs_Flower_bud	-1.51746	down	0.00405	0.023265
RNA polymerases N / 8 kDa subunit	VaccDscaff47-augustus-gene-142.39	Initial_vs_Flower_bud	-1.51655	down	5e-05	0.000509113
Calcium-dependent phosphotriesterase superfamily protein	VaccDscaff29-snap-gene-309.46	Initial_vs_Flower_bud	-1.51217	down	0.0032	0.0191338
RNA-binding (RRM/RBD/RNP motifs) family protein	VaccDscaff24-snap-gene-317.27	Initial_vs_Flower_bud	-1.51025	down	0.00105	0.00757987
6-phospho-3-hexuloisomerase (PHI)	VaccDscaff48-processed-gene-79.9	Initial_vs_Flower_bud	-1.5072	down	0.00055	0.00434745
importin alpha	VaccDscaff1-snap-gene-179.27	Initial_vs_Flower_bud	-1.50677	down	0.00955	0.0467232
ASH1-related protein 2	VaccDscaff161-processed-gene-2.4	Initial_vs_Flower_bud	-1.50612	down	0.00015	0.00138565
LOW protein: exocyst complex component-like protein	VaccDscaff24-augustus-gene-159.26	Initial_vs_Flower_bud	-1.50528	down	0.0048	0.0267622
Subunits of heterodimeric actin filament capping protein Capz superfamily	VaccDscaff18-snap-gene-96.30	Initial_vs_Flower_bud	-1.5008	down	5e-05	0.000509113
UDP-Glycosyltransferase superfamily protein	VaccDscaff48-snap-gene-75.37	Initial_vs_Flower_bud	-1.50039	down	5e-05	0.000509113
hypothetical protein	VaccDscaff1-augustus-gene-453.30	Initial_vs_Flower_bud	-1.49935	down	0.0003	0.00255629
hypothetical protein	VaccDscaff1-augustus-gene-300.35	Initial_vs_Flower_bud	-1.49648	down	5e-05	0.000509113
R3H domain containing 2	VaccDscaff1-augustus-gene-268.28	Initial_vs_Flower_bud	-1.49598	down	0.0054	0.0294661
Pentatricopeptide repeat (PPR) superfamily protein	VaccDscaff6-processed-gene-2.5	Initial_vs_Flower_bud	-1.4946	down	0.0046	0.0258662
DNA-directed RNA polymerase 1B, mitochondrial	VaccDscaff48-snap-gene-9.42	Initial_vs_Flower_bud	-1.494	down	0.0019	0.0123531
squamosa promoter-binding-like protein 18	VaccDscaff42-augustus-gene-9.40	Initial_vs_Flower_bud	-1.49248	down	0.00565	0.0305475
TatD DNase domain containing 1 L homeolog	VaccDscaff29-snap-gene-259.35	Initial_vs_Flower_bud	-1.48835	down	5e-05	0.000509113
proline-rich family protein	VaccDscaff14-snap-gene-347.32	Initial_vs_Flower_bud	-1.48754	down	0.0049	0.0272038
F-box protein 7	VaccDscaff3-snap-gene-247.35	Initial_vs_Flower_bud	-1.48544	down	5e-05	0.000509113
shaggy-related kinase 11	VaccDscaff3-augustus-gene-69.28	Initial_vs_Flower_bud	-1.48005	down	5e-05	0.000509113
Pentatricopeptide repeat (PPR) superfamily protein	VaccDscaff1-processed-gene-280.4	Initial_vs_Flower_bud	-1.47751	down	0.0075	0.0385183
Thioredoxin superfamily protein	VaccDscaff17-snap-gene-236.30	Initial_vs_Flower_bud	-1.47176	down	0.00165	0.0110142
Transmembrane proteins 14C	VaccDscaff29-augustus-gene-315.31	Initial_vs_Flower_bud	-1.46988	down	0.0006	0.00468546
Translation initiation factor 2, small GTP-binding protein	VaccDscaff1-snap-gene-402.49	Initial_vs_Flower_bud	-1.46707	down	5e-05	0.000509113
probable protein phosphatase 2C 28	VaccDscaff12-augustus-gene-386.23	Initial_vs_Flower_bud	-1.4655	down	0.0039	0.0225382
RING-H2 finger B1A	VaccDscaff28-snap-gene-40.43	Initial_vs_Flower_bud	-1.46446	down	5e-05	0.000509113
abhydrolase domain containing 17C, depalmitoylase	VaccDscaff3-augustus-gene-387.25	Initial_vs_Flower_bud	-1.45974	down	5e-05	0.000509113
ARF-GAP domain 9	VaccDscaff25-processed-gene-48.33	Initial_vs_Flower_bud	-1.45799	down	0.0029	0.0176082
C2H2-like zinc finger protein	VaccDscaff18-augustus-gene-31.33	Initial_vs_Flower_bud	-1.45783	down	0.0024	0.0150115
fused aspartate kinase/homoserine dehydrogenase 1	VaccDscaff15-snap-gene-92.26	Initial_vs_Flower_bud	-1.45376	down	5e-05	0.000509113
hypothetical protein (DUF1682)	VaccDscaff34-augustus-gene-217.27	Initial_vs_Flower_bud	-1.45205	down	0.00405	0.023265
carbamoyl phosphate synthetase A	VaccDscaff23-augustus-gene-272.29	Initial_vs_Flower_bud	-1.45169	down	0.0002	0.00178731
UDP-3-O-acyl N-acetylglycosamine deacetylase family protein	VaccDscaff3-augustus-gene-319.18	Initial_vs_Flower_bud	-1.45075	down	0.0006	0.00468546
GC-rich sequence DNA-binding factor-like protein with Tuftelin interacting domain-containing protein	VaccDscaff4-processed-gene-222.4	Initial_vs_Flower_bud	-1.4375	down	0.00205	0.0131537
Eukaryotic aspartyl protease family protein	VaccDscaff42-snap-gene-132.20	Initial_vs_Flower_bud	-1.43433	down	0.00525	0.0287909
Arginyl-tRNA synthetase, class Ic	VaccDscaff42-snap-gene-269.73	Initial_vs_Flower_bud	-1.43379	down	5e-05	0.000509113
Cytochrome b561/ferric reductase transmembrane protein family	VaccDscaff29-processed-gene-64.4	Initial_vs_Flower_bud	-1.43306	down	0.001	0.0072762
ADP-ribosylation factor 1-like	VaccDscaff30-snap-gene-338.34	Initial_vs_Flower_bud	-1.4298	down	0.0075	0.0385183
Pentatricopeptide repeat (PPR) superfamily protein	VaccDscaff1-processed-gene-198.5	Initial_vs_Flower_bud	-1.42836	down	0.0001	0.000960986
thioredoxin family protein	VaccDscaff24-processed-gene-235.3	Initial_vs_Flower_bud	-1.42792	down	5e-05	0.000509113
TEOSINTE BRANCHED 1, cycloidea and PCF transcription factor 2	VaccDscaff24-processed-gene-124.3	Initial_vs_Flower_bud	-1.4255	down	5e-05	0.000509113
indole-3-acetic acid inducible 14	VaccDscaff4-snap-gene-426.46	Initial_vs_Flower_bud	-1.42487	down	0.0001	0.000960986
Utp14p	VaccDscaff47-augustus-gene-188.36	Initial_vs_Flower_bud	-1.42268	down	0.0001	0.000960986
magnesium transporter 4	VaccDscaff34-snap-gene-149.19	Initial_vs_Flower_bud	-1.42087	down	0.00295	0.017862
Tetratricopeptide repeat (TPR)-like superfamily protein	VaccDscaff34-augustus-gene-102.21	Initial_vs_Flower_bud	-1.4206	down	0.00015	0.00138565
glutathione peroxidase 8	VaccDscaff43-snap-gene-247.34	Initial_vs_Flower_bud	-1.41702	down	5e-05	0.000509113
Nucleoporin interacting component (Nup93/Nic96-like) family protein	VaccDscaff1-snap-gene-287.32	Initial_vs_Flower_bud	-1.41506	down	0.0069	0.0359626
splicing factor U2af small subunit B	VaccDscaff12-processed-gene-18.34	Initial_vs_Flower_bud	-1.4149	down	0.0046	0.0258662
small nuclear ribonucleoprotein U5 subunit 40	VaccDscaff3-processed-gene-303.25	Initial_vs_Flower_bud	-1.41261	down	0.0001	0.000960986
t-complex 11 like 1	VaccDscaff3-augustus-gene-41.32	Initial_vs_Flower_bud	-1.40223	down	0.00425	0.0242135
casein kinase 1-like protein 2	VaccDscaff29-snap-gene-5.22	Initial_vs_Flower_bud	-1.40131	down	5e-05	0.000509113
Ribosomal protein S5 family protein	VaccDscaff4-augustus-gene-235.18	Initial_vs_Flower_bud	-1.40031	down	0.0049	0.0272038
DNA/RNA polymerases superfamily protein	VaccDscaff34-snap-gene-147.30	Initial_vs_Flower_bud	-1.39946	down	5e-05	0.000509113
B-box type zinc finger protein with CCT domain-containing protein	VaccDscaff7-snap-gene-402.42	Initial_vs_Flower_bud	-1.39656	down	0.00515	0.0283308
2-isopropylmalate synthase A-like	VaccDscaff1-snap-gene-135.28	Initial_vs_Flower_bud	-1.39423	down	5e-05	0.000509113
stress enhanced protein 2	VaccDscaff42-augustus-gene-52.34	Initial_vs_Flower_bud	-1.39379	down	5e-05	0.000509113
mitochondrial import inner membrane translocase subunit Tim9-like	VaccDscaff34-augustus-gene-310.26	Initial_vs_Flower_bud	-1.39073	down	5e-05	0.000509113
SC35-like splicing factor 30A	VaccDscaff39-augustus-gene-190.25	Initial_vs_Flower_bud	-1.38892	down	0.0073	0.0376586
TBP-associated factor 15	VaccDscaff4-augustus-gene-194.22	Initial_vs_Flower_bud	-1.3883	down	0.00025	0.00217815
membrane-associated mannitol-induced	VaccDscaff1-snap-gene-424.60	Initial_vs_Flower_bud	-1.38807	down	5e-05	0.000509113
MMS ZWEI homologue 3	VaccDscaff1-augustus-gene-214.13	Initial_vs_Flower_bud	-1.38348	down	5e-05	0.000509113
ribophorin II (RPN2) family protein	VaccDscaff47-augustus-gene-157.23	Initial_vs_Flower_bud	-1.38318	down	5e-05	0.000509113
Phosphotyrosine protein phosphatases superfamily protein	VaccDscaff3-augustus-gene-431.31	Initial_vs_Flower_bud	-1.38282	down	0.00335	0.0198581
heat shock cognate protein 80	VaccDscaff1-snap-gene-453.41	Initial_vs_Flower_bud	-1.38254	down	5e-05	0.000509113
calcium-dependent protein kinase 28	VaccDscaff42-augustus-gene-20.28	Initial_vs_Flower_bud	-1.37934	down	0.0037	0.0215877
Homeodomain-like superfamily protein	VaccDscaff42-augustus-gene-67.23	Initial_vs_Flower_bud	-1.37896	down	0.00015	0.00138565
Polynucleotidyl transferase, ribonuclease H-like superfamily protein	VaccDscaff28-processed-gene-72.22	Initial_vs_Flower_bud	-1.37895	down	0.0016	0.0107463
SOS3-interacting protein 3	VaccDscaff70-processed-gene-7.13	Initial_vs_Flower_bud	-1.376	down	5e-05	0.000509113
B-box type zinc finger family protein	VaccDscaff10-augustus-gene-80.26	Initial_vs_Flower_bud	-1.36945	down	0.00105	0.00757987
cryptochrome 2	VaccDscaff4-augustus-gene-65.46	Initial_vs_Flower_bud	-1.36603	down	5e-05	0.000509113
transcription factor TGA2.2-like	VaccDscaff10-augustus-gene-154.21	Initial_vs_Flower_bud	-1.36489	down	0.00705	0.0366072
DnaJ heat shock protein family (Hsp40) member B1	VaccDscaff3-augustus-gene-165.23	Initial_vs_Flower_bud	-1.36451	down	0.0016	0.0107463
BTB-POZ and MATH domain 4	VaccDscaff24-augustus-gene-307.28	Initial_vs_Flower_bud	-1.36423	down	0.0057	0.03077
RNA polymerase Rpb8	VaccDscaff23-snap-gene-191.32	Initial_vs_Flower_bud	-1.36268	down	5e-05	0.000509113
Haloacid dehalogenase-like hydrolase (HAD) superfamily protein	VaccDscaff29-augustus-gene-84.21	Initial_vs_Flower_bud	-1.36207	down	0.0066	0.0346654
indeterminate(ID)-domain 7	VaccDscaff4-augustus-gene-414.25	Initial_vs_Flower_bud	-1.3608	down	0.0043	0.024449
putative CHCH domain-containing protein	VaccDscaff17-snap-gene-211.32	Initial_vs_Flower_bud	-1.36053	down	0.0016	0.0107463
Bifunctional inhibitor/lipid-transfer protein/seed storage 2S albumin superfamily protein	VaccDscaff46-snap-gene-25.33	Initial_vs_Flower_bud	-1.35383	down	5e-05	0.000509113
BRCA1 associated RING domain 1	VaccDscaff1-augustus-gene-195.32	Initial_vs_Flower_bud	-1.35157	down	5e-05	0.000509113
2Fe-2S ferredoxin-like superfamily protein	VaccDscaff1-processed-gene-78.7	Initial_vs_Flower_bud	-1.35151	down	0.0053	0.0290156
SH3 domain-containing protein	VaccDscaff23-augustus-gene-352.29	Initial_vs_Flower_bud	-1.34911	down	5e-05	0.000509113
eukaryotic translation initiation factor 2B, subunit 4 delta	VaccDscaff35-snap-gene-248.39	Initial_vs_Flower_bud	-1.34602	down	0.0008	0.00600935
RING-H2 group F2A	VaccDscaff47-augustus-gene-38.18	Initial_vs_Flower_bud	-1.34519	down	5e-05	0.000509113
B-box type zinc finger protein with CCT domain-containing protein	VaccDscaff28-snap-gene-218.19	Initial_vs_Flower_bud	-1.33904	down	0.0066	0.0346654
root UVB sensitive-like protein (Protein of unknown function, DUF647)	VaccDscaff3-snap-gene-407.41	Initial_vs_Flower_bud	-1.33792	down	5e-05	0.000509113
Insulinase (Peptidase family M16) protein	VaccDscaff3-processed-gene-190.4	Initial_vs_Flower_bud	-1.33358	down	5e-05	0.000509113
Microtubule associated protein (MAP65/ASE1) family protein	VaccDscaff28-augustus-gene-163.24	Initial_vs_Flower_bud	-1.33162	down	5e-05	0.000509113
ADP glucose pyrophosphorylase large subunit 1	VaccDscaff4-augustus-gene-100.24	Initial_vs_Flower_bud	-1.32804	down	0.0001	0.000960986
nuclear assembly factor 1 ribonucleoprotein	VaccDscaff52-snap-gene-8.31	Initial_vs_Flower_bud	-1.32193	down	0.00675	0.035322
RNA-binding (RRM/RBD/RNP motifs) family protein	VaccDscaff1-augustus-gene-432.28	Initial_vs_Flower_bud	-1.31591	down	0.00135	0.00935942
indole-3-acetic acid inducible 9	VaccDscaff18-augustus-gene-271.38	Initial_vs_Flower_bud	-1.31485	down	0.00325	0.0193808
Tyrosyl-tRNA synthetase, class Ib, bacterial/mitochondrial	VaccDscaff511-augustus-gene-0.12	Initial_vs_Flower_bud	-1.31006	down	5e-05	0.000509113
photosystem I reaction center subunit IV A, chloroplastic	VaccDscaff34-processed-gene-240.22	Initial_vs_Flower_bud	-1.3095	down	0.00495	0.0274362
AMP-dependent synthetase and ligase family protein	VaccDscaff3-augustus-gene-192.31	Initial_vs_Flower_bud	-1.30833	down	0.0003	0.00255629
enolase	VaccDscaff33-augustus-gene-43.31	Initial_vs_Flower_bud	-1.30827	down	5e-05	0.000509113
F-box/RNI-like/FBD-like domains-containing protein	VaccDscaff6-augustus-gene-46.26	Initial_vs_Flower_bud	-1.30737	down	0.0007	0.00535742
ubiquitin-specific protease 2	VaccDscaff4-augustus-gene-118.24	Initial_vs_Flower_bud	-1.30669	down	0.0002	0.00178731
SUMO activating enzyme 1B	VaccDscaff34-augustus-gene-72.30	Initial_vs_Flower_bud	-1.30479	down	0.00495	0.0274362
cold inducible RNA binding protein S homeolog	VaccDscaff40-snap-gene-235.36	Initial_vs_Flower_bud	-1.30424	down	0.00025	0.00217815
myb domain protein 73	VaccDscaff23-processed-gene-311.8	Initial_vs_Flower_bud	-1.29928	down	0.00695	0.0361801
UTP20 small subunit processome component	VaccDscaff3-snap-gene-350.42	Initial_vs_Flower_bud	-1.29909	down	0.00405	0.023265
phytochrome and flowering time regulatory protein (PFT1)	VaccDscaff28-snap-gene-225.25	Initial_vs_Flower_bud	-1.2966	down	0.00865	0.0432732
LIM domain-containing protein	VaccDscaff47-augustus-gene-19.23	Initial_vs_Flower_bud	-1.29271	down	0.00415	0.0237389
major facilitator superfamily domain containing 14A	VaccDscaff14-augustus-gene-388.29	Initial_vs_Flower_bud	-1.28977	down	5e-05	0.000509113
ribosomal protein S15A	VaccDscaff28-processed-gene-300.27	Initial_vs_Flower_bud	-1.28914	down	0.00235	0.0147509
Rad21/Rec8-like family protein	VaccDscaff3-snap-gene-373.20	Initial_vs_Flower_bud	-1.28749	down	5e-05	0.000509113
chloroplast-localized ISCA-like protein	VaccDscaff42-snap-gene-53.42	Initial_vs_Flower_bud	-1.28339	down	0.0001	0.000960986
Nodulin MtN3 family protein	VaccDscaff47-processed-gene-188.1	Initial_vs_Flower_bud	-1.28297	down	5e-05	0.000509113
BRISC and BRCA1 A complex member 1	VaccDscaff3-augustus-gene-421.27	Initial_vs_Flower_bud	-1.28207	down	0.00325	0.0193808
SNARE-like superfamily protein	VaccDscaff30-snap-gene-201.33	Initial_vs_Flower_bud	-1.28001	down	0.0081	0.0409946
agenet domain protein (DOMAIN OF UNKNOWN FUNCTION 724 7)	VaccDscaff4-processed-gene-403.5	Initial_vs_Flower_bud	-1.27855	down	5e-05	0.000509113
Chlorophyll A-B binding family protein	VaccDscaff37-augustus-gene-126.12	Initial_vs_Flower_bud	-1.27849	down	0.00545	0.0296438
BES1/BZR1 homolog 4	VaccDscaff4-augustus-gene-215.27	Initial_vs_Flower_bud	-1.2768	down	5e-05	0.000509113
transmembrane protein 87B	VaccDscaff17-augustus-gene-6.37	Initial_vs_Flower_bud	-1.27313	down	0.00555	0.0300974
glyoxalase II 3	VaccDscaff1-snap-gene-397.37	Initial_vs_Flower_bud	-1.27071	down	0.0002	0.00178731
probable serine acetyltransferase 2	VaccDscaff12-processed-gene-380.26	Initial_vs_Flower_bud	-1.26496	down	0.0076	0.0389428
HSP70-interacting protein 1	VaccDscaff22-augustus-gene-139.30	Initial_vs_Flower_bud	-1.26063	down	0.0028	0.0170969
HSP20-like chaperones superfamily protein	VaccDscaff42-augustus-gene-37.24	Initial_vs_Flower_bud	-1.25458	down	0.00025	0.00217815
Ctr copper transporter family	VaccDscaff47-processed-gene-105.3	Initial_vs_Flower_bud	-1.2523	down	0.00045	0.00364749
Ribosomal protein S10p/S20e family protein	VaccDscaff29-snap-gene-81.45	Initial_vs_Flower_bud	-1.25143	down	5e-05	0.000509113
Bdf2p	VaccDscaff3-snap-gene-46.44	Initial_vs_Flower_bud	-1.24756	down	0.00745	0.0383035
rhodanese-like domain-containing protein / PPIC-type PPIASE domain-containing protein	VaccDscaff47-snap-gene-30.34	Initial_vs_Flower_bud	-1.24639	down	0.00125	0.0087766
RRN3 homolog, RNA polymerase I transcription factor	VaccDscaff42-augustus-gene-28.23	Initial_vs_Flower_bud	-1.24512	down	0.00575	0.0309915
aspartate-semialdehyde dehydrogenase	VaccDscaff28-snap-gene-175.28	Initial_vs_Flower_bud	-1.24426	down	0.0003	0.00255629
family with sequence similarity 32 member A	VaccDscaff30-processed-gene-246.5	Initial_vs_Flower_bud	-1.24424	down	5e-05	0.000509113
protein GENOMES UNCOUPLED 4	VaccDscaff3-processed-gene-272.6	Initial_vs_Flower_bud	-1.24173	down	0.00505	0.0278692
Ankyrin repeat family protein	VaccDscaff28-augustus-gene-185.22	Initial_vs_Flower_bud	-1.24027	down	0.00025	0.00217815
Transducin/WD40 repeat-like superfamily protein	VaccDscaff1-augustus-gene-460.30	Initial_vs_Flower_bud	-1.23952	down	0.0017	0.0112779
transmembrane kinase-like 1	VaccDscaff24-augustus-gene-42.37	Initial_vs_Flower_bud	-1.23949	down	0.00445	0.0251549
ribonuclease II family protein	VaccDscaff23-augustus-gene-58.36	Initial_vs_Flower_bud	-1.23773	down	0.0092	0.0453884
GNAT acetyltransferase (DUF699)	VaccDscaff42-snap-gene-53.46	Initial_vs_Flower_bud	-1.23684	down	5e-05	0.000509113
GroES-like family protein	VaccDscaff23-snap-gene-151.22	Initial_vs_Flower_bud	-1.23638	down	5e-05	0.000509113
ferritin	VaccDscaff29-augustus-gene-121.23	Initial_vs_Flower_bud	-1.23553	down	5e-05	0.000509113
RING/U-box superfamily protein	VaccDscaff28-snap-gene-304.35	Initial_vs_Flower_bud	-1.23467	down	0.00095	0.00696513
SNF7 family protein	VaccDscaff48-snap-gene-37.56	Initial_vs_Flower_bud	-1.23444	down	0.00095	0.00696513
RNA binding protein with multiple splicing 2	VaccDscaff34-snap-gene-5.25	Initial_vs_Flower_bud	-1.23158	down	5e-05	0.000509113
PPR containing protein	VaccDscaff47-augustus-gene-60.34	Initial_vs_Flower_bud	-1.231	down	0.006	0.0321144
serine/threonine protein kinase Pom2	VaccDscaff54-snap-gene-11.34	Initial_vs_Flower_bud	-1.22211	down	0.00025	0.00217815
Auxin efflux carrier family protein	VaccDscaff34-augustus-gene-291.26	Initial_vs_Flower_bud	-1.22136	down	0.0094	0.0461862
ENTH/VHS family protein	VaccDscaff3-snap-gene-313.34	Initial_vs_Flower_bud	-1.21981	down	0.0012	0.00848185
histone deacetylase HDT1	VaccDscaff24-snap-gene-112.20	Initial_vs_Flower_bud	-1.21932	down	5e-05	0.000509113
Eukaryotic rpb5 RNA polymerase subunit family protein	VaccDscaff29-augustus-gene-311.39	Initial_vs_Flower_bud	-1.21931	down	5e-05	0.000509113
multidrug resistance protein	VaccDscaff4-augustus-gene-276.25	Initial_vs_Flower_bud	-1.21848	down	0.0016	0.0107463
phytochrome interacting factor 3	VaccDscaff3-processed-gene-62.6	Initial_vs_Flower_bud	-1.2162	down	0.003	0.0181156
response regulator 3	VaccDscaff29-processed-gene-310.14	Initial_vs_Flower_bud	-1.20875	down	5e-05	0.000509113
2-oxoglutarate (2OG) and Fe(II)-dependent oxygenase superfamily protein	VaccDscaff28-augustus-gene-184.20	Initial_vs_Flower_bud	-1.20756	down	5e-05	0.000509113
14-3-3 protein 10	VaccDscaff41-augustus-gene-1.11	Initial_vs_Flower_bud	-1.20424	down	5e-05	0.000509113
SYF2 pre-mRNA splicing factor	VaccDscaff42-augustus-gene-206.36	Initial_vs_Flower_bud	-1.20382	down	0.00135	0.00935942
selenium-binding protein 1	VaccDscaff14-augustus-gene-78.31	Initial_vs_Flower_bud	-1.19306	down	0.0037	0.0215877
membrane associated ring-CH-type finger 1	VaccDscaff23-augustus-gene-19.39	Initial_vs_Flower_bud	-1.19032	down	0.0003	0.00255629
family with sequence similarity 135 member B L homeolog	VaccDscaff47-snap-gene-27.46	Initial_vs_Flower_bud	-1.18683	down	0.00015	0.00138565
NAC domain-containing protein 1	VaccDscaff3-augustus-gene-158.19	Initial_vs_Flower_bud	-1.17959	down	5e-05	0.000509113
Tetratricopeptide repeat (TPR)-like superfamily protein	VaccDscaff47-snap-gene-126.47	Initial_vs_Flower_bud	-1.17946	down	0.0002	0.00178731
histone acetyltransferase of the GNAT family 2	VaccDscaff42-augustus-gene-263.19	Initial_vs_Flower_bud	-1.17839	down	5e-05	0.000509113
DnaJ heat shock protein family (Hsp40) member C17	VaccDscaff39-augustus-gene-42.22	Initial_vs_Flower_bud	-1.17526	down	5e-05	0.000509113
mercaptopyruvate sulfurtransferase 1	VaccDscaff6-snap-gene-4.42	Initial_vs_Flower_bud	-1.17159	down	0.0001	0.000960986
RNA-binding protein	VaccDscaff3-augustus-gene-309.30	Initial_vs_Flower_bud	-1.16966	down	0.0021	0.0134248
Ggamma-subunit 1	VaccDscaff4-augustus-gene-57.30	Initial_vs_Flower_bud	-1.16857	down	0.0018	0.0118272
dCTP pyrophosphatase 1	VaccDscaff4-snap-gene-82.48	Initial_vs_Flower_bud	-1.16048	down	5e-05	0.000509113
Argonaute family protein	VaccDscaff47-augustus-gene-32.24	Initial_vs_Flower_bud	-1.15627	down	0.006	0.0321144
RNA-binding (RRM/RBD/RNP motifs) family protein with retrovirus zinc finger-like domain-containing protein	VaccDscaff3-augustus-gene-36.31	Initial_vs_Flower_bud	-1.15344	down	0.00025	0.00217815
NIP7, nucleolar pre-rRNA processing protein	VaccDscaff1-augustus-gene-36.29	Initial_vs_Flower_bud	-1.1495	down	0.0002	0.00178731
hypothetical protein	VaccDscaff40-augustus-gene-115.16	Initial_vs_Flower_bud	-1.14918	down	0.0033	0.0196304
class I heat shock protein, putative (DUF1423)	VaccDscaff28-augustus-gene-167.30	Initial_vs_Flower_bud	-1.14608	down	5e-05	0.000509113
basic pentacysteine 6	VaccDscaff23-processed-gene-353.7	Initial_vs_Flower_bud	-1.14402	down	0.0001	0.000960986
calcium-dependent protein kinase 17-like	VaccDscaff29-snap-gene-71.40	Initial_vs_Flower_bud	-1.14157	down	5e-05	0.000509113
survival motor neuron domain containing 1	VaccDscaff34-augustus-gene-206.16	Initial_vs_Flower_bud	-1.13848	down	5e-05	0.000509113
nuclear-encoded CLP protease P7	VaccDscaff1-snap-gene-148.39	Initial_vs_Flower_bud	-1.13762	down	0.00065	0.00502564
mitochondrial amidoxime reducing component 2	VaccDscaff82-augustus-gene-6.32	Initial_vs_Flower_bud	-1.13708	down	0.0001	0.000960986
U2 small nuclear ribonucleoprotein A	VaccDscaff4-snap-gene-394.39	Initial_vs_Flower_bud	-1.13494	down	0.0003	0.00255629
basic helix-loop-helix (bHLH) DNA-binding superfamily protein	VaccDscaff48-processed-gene-9.3	Initial_vs_Flower_bud	-1.13035	down	0.00015	0.00138565
villin 4	VaccDscaff98-snap-gene-4.59	Initial_vs_Flower_bud	-1.12849	down	5e-05	0.000509113
protein kinase 1	VaccDscaff28-augustus-gene-169.13	Initial_vs_Flower_bud	-1.12356	down	0.00075	0.00568581
molecular chaperone DnaJ	VaccDscaff38-processed-gene-278.1	Initial_vs_Flower_bud	-1.12328	down	5e-05	0.000509113
cyclin D-type binding-protein 1 S homeolog	VaccDscaff3-snap-gene-104.32	Initial_vs_Flower_bud	-1.12139	down	0.0005	0.00400018
ycf3-interacting protein 1, chloroplastic	VaccDscaff28-snap-gene-120.25	Initial_vs_Flower_bud	-1.12117	down	5e-05	0.000509113
ferritin-2, chloroplastic	VaccDscaff28-snap-gene-319.35	Initial_vs_Flower_bud	-1.11012	down	0.00035	0.00292308
tankyrase	VaccDscaff5-augustus-gene-229.25	Initial_vs_Flower_bud	-1.10126	down	0.0019	0.0123531
RING/U-box superfamily protein	VaccDscaff34-augustus-gene-303.28	Initial_vs_Flower_bud	-1.09987	down	5e-05	0.000509113
plant U-box 13	VaccDscaff47-augustus-gene-93.32	Initial_vs_Flower_bud	-1.09962	down	0.00145	0.00992179
bifunctional nitrilase/nitrile hydratase NIT4A	VaccDscaff47-augustus-gene-46.31	Initial_vs_Flower_bud	-1.09808	down	0.0075	0.0385183
Nop53 protein	VaccDscaff48-snap-gene-81.50	Initial_vs_Flower_bud	-1.09703	down	5e-05	0.000509113
RNA-binding (RRM/RBD/RNP motifs) family protein	VaccDscaff24-augustus-gene-331.16	Initial_vs_Flower_bud	-1.09262	down	5e-05	0.000509113
RNA-binding (RRM/RBD/RNP motifs) family protein	VaccDscaff6-augustus-gene-183.18	Initial_vs_Flower_bud	-1.08973	down	5e-05	0.000509113
Protein phosphatase 2C family protein	VaccDscaff28-snap-gene-70.38	Initial_vs_Flower_bud	-1.08867	down	0.00085	0.00632968
SUMO-activating enzyme 2	VaccDscaff14-snap-gene-376.30	Initial_vs_Flower_bud	-1.08754	down	5e-05	0.000509113
1-deoxy-D-xylulose 5-phosphate reductoisomerase, chloroplastic-like	VaccDscaff34-snap-gene-100.28	Initial_vs_Flower_bud	-1.08391	down	0.00085	0.00632968
Ribonuclease III family protein	VaccDscaff18-snap-gene-255.31	Initial_vs_Flower_bud	-1.08183	down	5e-05	0.000509113
SOS3-interacting protein 1	VaccDscaff47-processed-gene-122.5	Initial_vs_Flower_bud	-1.078	down	0.0004	0.00328645
PHD finger family protein / bromo-adjacent homology (BAH) domain-containing protein	VaccDscaff28-snap-gene-47.31	Initial_vs_Flower_bud	-1.07611	down	0.0001	0.000960986
RNA-binding (RRM/RBD/RNP motifs) family protein	VaccDscaff4-augustus-gene-136.38	Initial_vs_Flower_bud	-1.07319	down	0.0002	0.00178731
huntingtin interacting protein K	VaccDscaff4-snap-gene-32.57	Initial_vs_Flower_bud	-1.07064	down	0.00015	0.00138565
R3H domain containing 1	VaccDscaff48-snap-gene-42.47	Initial_vs_Flower_bud	-1.0686	down	5e-05	0.000509113
Protein kinase superfamily protein	VaccDscaff29-augustus-gene-250.18	Initial_vs_Flower_bud	-1.06586	down	5e-05	0.000509113
MATE efflux family protein	VaccDscaff4-augustus-gene-293.24	Initial_vs_Flower_bud	-1.06115	down	0.00025	0.00217815
eukaryotic translation initiation factor 2 subunit gamma	VaccDscaff39-augustus-gene-16.22	Initial_vs_Flower_bud	-1.06101	down	5e-05	0.000509113
Zinc finger C-x8-C-x5-C-x3-H type family protein	VaccDscaff23-snap-gene-355.29	Initial_vs_Flower_bud	-1.05663	down	0.0004	0.00328645
protein DCL, chloroplastic	VaccDscaff23-snap-gene-318.42	Initial_vs_Flower_bud	-1.0554	down	5e-05	0.000509113
heterogeneous nuclear ribonucleoprotein F	VaccDscaff42-augustus-gene-27.39	Initial_vs_Flower_bud	-1.05368	down	5e-05	0.000509113
Glycosyl hydrolase superfamily protein	VaccDscaff42-augustus-gene-96.24	Initial_vs_Flower_bud	-1.05305	down	5e-05	0.000509113
shaggy-like protein kinase 32	VaccDscaff23-snap-gene-107.36	Initial_vs_Flower_bud	-1.05263	down	0.00035	0.00292308
Class II aaRS and biotin synthetases superfamily protein	VaccDscaff42-snap-gene-47.33	Initial_vs_Flower_bud	-1.04373	down	5e-05	0.000509113
Zinc finger (CCCH-type) family protein / RNA recognition motif (RRM)-containing protein	VaccDscaff47-augustus-gene-28.26	Initial_vs_Flower_bud	-1.03788	down	0.00525	0.0287909
SufE/NifU family protein	VaccDscaff23-snap-gene-200.43	Initial_vs_Flower_bud	-1.03383	down	0.0007	0.00535742
polypyrimidine tract-binding protein 3	VaccDscaff3-augustus-gene-85.38	Initial_vs_Flower_bud	-1.03381	down	0.0011	0.00788288
etoposide-induced protein	VaccDscaff3-snap-gene-44.32	Initial_vs_Flower_bud	-1.0318	down	0.00215	0.0136909
Putative plant snare 13	VaccDscaff1-snap-gene-2.25	Initial_vs_Flower_bud	-1.03112	down	0.00015	0.00138565
U2 small nuclear ribonucleoprotein B	VaccDscaff47-augustus-gene-120.38	Initial_vs_Flower_bud	-1.02858	down	5e-05	0.000509113
related to AP2 4	VaccDscaff23-processed-gene-236.2	Initial_vs_Flower_bud	-1.02668	down	0.00025	0.00217815
acyl-CoA thioesterase 8	VaccDscaff256-snap-gene-0.68	Initial_vs_Flower_bud	-1.02583	down	0.0026	0.0160553
ribosomal protein S13	VaccDscaff23-snap-gene-127.40	Initial_vs_Flower_bud	-1.01207	down	0.00055	0.00434745
Kinase interacting (KIP1-like) family protein	VaccDscaff190-augustus-gene-0.29	Initial_vs_Flower_bud	-1.01041	down	5e-05	0.000509113
Adaptin family protein	VaccDscaff3-augustus-gene-410.23	Initial_vs_Flower_bud	-1.00437	down	0.0067	0.035103
PLAT/LH2 domain-containing lipoxygenase family protein	VaccDscaff4-augustus-gene-272.25	Initial_vs_Flower_bud	-1.00381	down	5e-05	0.000509113
NADH dehydrogenase ubiquinone 1 beta subcomplex subunit 10-B-like protein (Complex I subunit NDUFS6)	VaccDscaff39-augustus-gene-134.10	Initial_vs_Flower_bud	-0.993141	down	5e-05	0.000509113
WD repeat domain 83	VaccDscaff42-augustus-gene-55.31	Initial_vs_Flower_bud	-0.990954	down	5e-05	0.000509113
mitogen-activated protein kinase phosphatase 1	VaccDscaff3-snap-gene-185.39	Initial_vs_Flower_bud	-0.986806	down	0.0026	0.0160553
Transducin/WD40 repeat-like superfamily protein	VaccDscaff3-augustus-gene-11.38	Initial_vs_Flower_bud	-0.98637	down	0.0009	0.00664913
related to KPC1	VaccDscaff39-augustus-gene-100.19	Initial_vs_Flower_bud	-0.98188	down	0.00115	0.00818736
Acyl-CoA N-acyltransferases (NAT) superfamily protein	VaccDscaff3-augustus-gene-169.15	Initial_vs_Flower_bud	-0.974603	down	5e-05	0.000509113
zinc finger, matrin type 2	VaccDscaff3-augustus-gene-75.21	Initial_vs_Flower_bud	-0.973291	down	5e-05	0.000509113
acyl-CoA oxidase 4	VaccDscaff73-snap-gene-3.36	Initial_vs_Flower_bud	-0.971813	down	0.00455	0.0256318
P-loop containing nucleoside triphosphate hydrolases superfamily protein	VaccDscaff23-augustus-gene-365.31	Initial_vs_Flower_bud	-0.970665	down	0.0003	0.00255629
aldehyde dehydrogenase 2B4	VaccDscaff34-augustus-gene-105.33	Initial_vs_Flower_bud	-0.96806	down	5e-05	0.000509113
Tetratricopeptide repeat (TPR)-like superfamily protein	VaccDscaff34-processed-gene-307.6	Initial_vs_Flower_bud	-0.966241	down	0.0008	0.00600935
RNA polymerase II transcription mediator	VaccDscaff34-augustus-gene-285.24	Initial_vs_Flower_bud	-0.965383	down	0.0005	0.00400018
trafficking protein particle complex 6b	VaccDscaff17-snap-gene-194.35	Initial_vs_Flower_bud	-0.964956	down	5e-05	0.000509113
elongation factor family protein	VaccDscaff29-augustus-gene-327.29	Initial_vs_Flower_bud	-0.962663	down	5e-05	0.000509113
vacuolar H+-pumping ATPase 16 kDa proteolipid subunit 4	VaccDscaff23-processed-gene-353.10	Initial_vs_Flower_bud	-0.962453	down	0.0002	0.00178731
P-loop containing nucleoside triphosphate hydrolases superfamily protein	VaccDscaff47-augustus-gene-80.31	Initial_vs_Flower_bud	-0.960434	down	5e-05	0.000509113
T-complex protein 1 alpha subunit	VaccDscaff23-snap-gene-138.28	Initial_vs_Flower_bud	-0.950193	down	5e-05	0.000509113
homogentisate 1,2-dioxygenase	VaccDscaff1-augustus-gene-414.40	Initial_vs_Flower_bud	-0.950109	down	0.00015	0.00138565
Endomembrane protein 70 protein family	VaccDscaff70-augustus-gene-7.64	Initial_vs_Flower_bud	-0.949041	down	0.0009	0.00664913
serine hydroxymethyltransferase 4	VaccDscaff4-augustus-gene-122.39	Initial_vs_Flower_bud	-0.944635	down	5e-05	0.000509113
methionine gamma-lyase	VaccDscaff28-snap-gene-3.36	Initial_vs_Flower_bud	-0.944069	down	0.0001	0.000960986
RNA-binding (RRM/RBD/RNP motifs) family protein with retrovirus zinc finger-like domain-containing protein	VaccDscaff34-augustus-gene-321.38	Initial_vs_Flower_bud	-0.943356	down	0.0008	0.00600935
GRB10 interacting GYF protein 2	VaccDscaff18-augustus-gene-30.26	Initial_vs_Flower_bud	-0.941402	down	0.01035	0.0498898
general control non-repressible 3	VaccDscaff28-snap-gene-6.28	Initial_vs_Flower_bud	-0.939935	down	0.00265	0.0163189
nicotinate phosphoribosyltransferase 2	VaccDscaff30-augustus-gene-242.26	Initial_vs_Flower_bud	-0.939133	down	5e-05	0.000509113
PDGFA associated protein 1	VaccDscaff4-augustus-gene-227.32	Initial_vs_Flower_bud	-0.936624	down	0.00065	0.00502564
Pre-mRNA cleavage complex II protein family	VaccDscaff34-snap-gene-119.25	Initial_vs_Flower_bud	-0.93658	down	0.0002	0.00178731
auxin response factor 2A	VaccDscaff34-snap-gene-64.35	Initial_vs_Flower_bud	-0.934531	down	0.00435	0.0246889
Protein kinase superfamily protein	VaccDscaff29-augustus-gene-3.26	Initial_vs_Flower_bud	-0.93307	down	0.00675	0.035322
SAWADEE HOMEODOMAIN protein	VaccDscaff4-snap-gene-421.31	Initial_vs_Flower_bud	-0.931689	down	5e-05	0.000509113
Protein kinase superfamily protein	VaccDscaff22-augustus-gene-28.26	Initial_vs_Flower_bud	-0.926403	down	0.0002	0.00178731
regulatory components of ABA receptor 3	VaccDscaff48-augustus-gene-99.29	Initial_vs_Flower_bud	-0.92064	down	0.00445	0.0251549
hydroxyproline-rich glycoprotein family protein	VaccDscaff34-augustus-gene-24.35	Initial_vs_Flower_bud	-0.918765	down	0.00605	0.0323192
ASF1 like histone chaperone	VaccDscaff18-augustus-gene-288.18	Initial_vs_Flower_bud	-0.918578	down	0.0016	0.0107463
electron transfer flavoprotein alpha	VaccDscaff6-augustus-gene-47.40	Initial_vs_Flower_bud	-0.917099	down	0.00025	0.00217815
sodium channel modifier 1	VaccDscaff3-augustus-gene-7.29	Initial_vs_Flower_bud	-0.913374	down	0.0001	0.000960986
eukaryotic translation initiation factor 4E-1-like	VaccDscaff28-augustus-gene-148.19	Initial_vs_Flower_bud	-0.911763	down	5e-05	0.000509113
ATPase, F1 complex, gamma subunit protein	VaccDscaff24-processed-gene-184.3	Initial_vs_Flower_bud	-0.910963	down	0.0003	0.00255629
SUMO-activating enzyme 1A	VaccDscaff27-augustus-gene-273.24	Initial_vs_Flower_bud	-0.910003	down	0.0005	0.00400018
phosphatidylinositol/phosphatidylcholine-binding protein	VaccDscaff1-augustus-gene-143.28	Initial_vs_Flower_bud	-0.906305	down	5e-05	0.000509113
Basic-leucine zipper (bZIP) transcription factor family protein	VaccDscaff3-augustus-gene-285.16	Initial_vs_Flower_bud	-0.904807	down	0.0006	0.00468546
probable protein arginine N-methyltransferase 1	VaccDscaff30-augustus-gene-49.31	Initial_vs_Flower_bud	-0.903833	down	5e-05	0.000509113
DegP protease 10	VaccDscaff17-snap-gene-199.37	Initial_vs_Flower_bud	-0.898832	down	0.0063	0.033355
Lateral root primordium (LRP) protein-like protein	VaccDscaff24-processed-gene-345.11	Initial_vs_Flower_bud	-0.898135	down	0.00045	0.00364749
hypothetical protein	VaccDscaff24-augustus-gene-70.32	Initial_vs_Flower_bud	-0.892307	down	5e-05	0.000509113
LYR family of Fe/S cluster biogenesis protein	VaccDscaff19-snap-gene-94.36	Initial_vs_Flower_bud	-0.891656	down	0.0002	0.00178731
plant intracellular ras group-related LRR 9	VaccDscaff4-augustus-gene-374.35	Initial_vs_Flower_bud	-0.890621	down	0.00095	0.00696513
indole-3-acetic acid inducible 11	VaccDscaff47-snap-gene-154.49	Initial_vs_Flower_bud	-0.887796	down	5e-05	0.000509113
lipoyl synthase, mitochondrial	VaccDscaff52-augustus-gene-7.22	Initial_vs_Flower_bud	-0.886942	down	5e-05	0.000509113
N-terminal nucleophile aminohydrolases (Ntn hydrolases) superfamily protein	VaccDscaff42-augustus-gene-143.16	Initial_vs_Flower_bud	-0.884869	down	0.00325	0.0193808
60S ribosomal protein L34	VaccDscaff30-processed-gene-327.1	Initial_vs_Flower_bud	-0.883148	down	0.0004	0.00328645
dolichol-phosphate mannosyltransferase-like protein	VaccDscaff47-augustus-gene-142.40	Initial_vs_Flower_bud	-0.880441	down	5e-05	0.000509113
omega-3 fatty acid desaturase, chloroplastic	VaccDscaff47-augustus-gene-110.29	Initial_vs_Flower_bud	-0.877653	down	0.00105	0.00757987
SNF7 family protein	VaccDscaff42-snap-gene-265.22	Initial_vs_Flower_bud	-0.876996	down	0.0019	0.0123531
basic helix-loop-helix (bHLH) DNA-binding superfamily protein	VaccDscaff34-processed-gene-27.5	Initial_vs_Flower_bud	-0.873449	down	0.0061	0.0324943
Ribosomal protein L14p/L23e family protein	VaccDscaff24-snap-gene-39.78	Initial_vs_Flower_bud	-0.872138	down	0.0006	0.00468546
Ribosomal protein S5 family protein	VaccDscaff26-augustus-gene-341.26	Initial_vs_Flower_bud	-0.871386	down	0.00015	0.00138565
Tetratricopeptide repeat (TPR)-like superfamily protein	VaccDscaff32-snap-gene-304.58	Initial_vs_Flower_bud	-0.870947	down	0.0022	0.0139552
DR1 associated protein 1	VaccDscaff921-augustus-gene-0.6	Initial_vs_Flower_bud	-0.867406	down	5e-05	0.000509113
Thioredoxin superfamily protein	VaccDscaff32-snap-gene-263.29	Initial_vs_Flower_bud	-0.866236	down	5e-05	0.000509113
alanine-2-oxoglutarate aminotransferase 2	VaccDscaff35-augustus-gene-197.37	Initial_vs_Flower_bud	-0.863921	down	5e-05	0.000509113
oligopeptide transporter	VaccDscaff145-augustus-gene-0.34	Initial_vs_Flower_bud	-0.863591	down	0.0005	0.00400018
Mitochondrial transcription termination factor family protein	VaccDscaff42-snap-gene-184.34	Initial_vs_Flower_bud	-0.862266	down	0.0001	0.000960986
HD-ZIP IV family of homeobox-leucine zipper protein with lipid-binding START domain-containing protein	VaccDscaff4-augustus-gene-423.32	Initial_vs_Flower_bud	-0.860084	down	0.00015	0.00138565
autophagy 3 (APG3)	VaccDscaff48-augustus-gene-88.32	Initial_vs_Flower_bud	-0.850668	down	0.00165	0.0110142
plastid developmental protein DAG	VaccDscaff1-augustus-gene-24.36	Initial_vs_Flower_bud	-0.844192	down	0.0009	0.00664913
RNA helicase family protein	VaccDscaff29-snap-gene-259.36	Initial_vs_Flower_bud	-0.841762	down	0.00315	0.0188828
cullin-associated and neddylation dissociated	VaccDscaff34-snap-gene-206.19	Initial_vs_Flower_bud	-0.841052	down	5e-05	0.000509113
Threonyl-tRNA synthetase	VaccDscaff3-augustus-gene-173.12	Initial_vs_Flower_bud	-0.840122	down	0.00015	0.00138565
DEAD/DEAH box RNA helicase family protein	VaccDscaff34-processed-gene-40.1	Initial_vs_Flower_bud	-0.83788	down	0.0003	0.00255629
ankyrin repeat and zinc finger peptidyl tRNA hydrolase 1	VaccDscaff22-augustus-gene-35.54	Initial_vs_Flower_bud	-0.837054	down	5e-05	0.000509113
annexin 1	VaccDscaff18-augustus-gene-74.29	Initial_vs_Flower_bud	-0.836367	down	5e-05	0.000509113
putative DEAD-box ATP-dependent RNA helicase 29	VaccDscaff18-augustus-gene-176.26	Initial_vs_Flower_bud	-0.832268	down	0.0009	0.00664913
cyclin-dependent kinase C-1-like	VaccDscaff47-snap-gene-32.25	Initial_vs_Flower_bud	-0.831291	down	0.0006	0.00468546
tubby-like F-box protein 8	VaccDscaff34-augustus-gene-227.23	Initial_vs_Flower_bud	-0.82972	down	0.00505	0.0278692
La protein 1	VaccDscaff28-snap-gene-105.37	Initial_vs_Flower_bud	-0.826701	down	0.00175	0.0115544
histidinol-phosphate aminotransferase, chloroplastic	VaccDscaff44-processed-gene-168.8	Initial_vs_Flower_bud	-0.818668	down	0.00045	0.00364749
calcium homeostasis regulator	VaccDscaff32-augustus-gene-295.40	Initial_vs_Flower_bud	-0.817058	down	0.0003	0.00255629
pumilio 2	VaccDscaff47-snap-gene-100.25	Initial_vs_Flower_bud	-0.81532	down	5e-05	0.000509113
Pentatricopeptide repeat (PPR) superfamily protein	VaccDscaff14-snap-gene-392.29	Initial_vs_Flower_bud	-0.810285	down	5e-05	0.000509113
light-regulated chloroplast-localized protein	VaccDscaff52-augustus-gene-11.34	Initial_vs_Flower_bud	-0.804722	down	0.00085	0.00632968
lsd one like 2	VaccDscaff24-augustus-gene-235.33	Initial_vs_Flower_bud	-0.803812	down	0.001	0.0072762
F-box family protein	VaccDscaff23-processed-gene-307.0	Initial_vs_Flower_bud	-0.79979	down	5e-05	0.000509113
P-loop containing nucleoside triphosphate hydrolases superfamily protein	VaccDscaff4-augustus-gene-12.26	Initial_vs_Flower_bud	-0.795301	down	0.0067	0.035103
polymerase gamma 1	VaccDscaff1702-augustus-gene-0.2	Initial_vs_Flower_bud	-0.773212	down	0.0002	0.00178731
ubiquitin-conjugating enzyme 36	VaccDscaff748-augustus-gene-0.6	Initial_vs_Flower_bud	-0.765869	down	5e-05	0.000509113
NIFU-like protein 2	VaccDscaff34-augustus-gene-217.28	Initial_vs_Flower_bud	-0.755583	down	5e-05	0.000509113
ribosomal protein L15	VaccDscaff28-snap-gene-217.15	Initial_vs_Flower_bud	0.722806	up	0.00765	0.0391281
mRNAadenosine methylase	VaccDscaff49-augustus-gene-8.43	Initial_vs_Flower_bud	0.729374	up	5e-05	0.000509113
Ribosomal protein S4	VaccDscaff3-augustus-gene-162.26	Initial_vs_Flower_bud	0.741872	up	0.00225	0.0142218
Protein phosphatase 2C family protein	VaccDscaff45-augustus-gene-187.27	Initial_vs_Flower_bud	0.744495	up	5e-05	0.000509113
ATPase, V0 complex, subunit E	VaccDscaff93-augustus-gene-4.31	Initial_vs_Flower_bud	0.76052	up	0.001	0.0072762
ferredoxin 2	VaccDscaff24-processed-gene-52.7	Initial_vs_Flower_bud	0.764646	up	5e-05	0.000509113
ubiquitin-conjugating enzyme 27	VaccDscaff4-augustus-gene-390.20	Initial_vs_Flower_bud	0.771084	up	5e-05	0.000509113
Ribosomal protein L21	VaccDscaff2-snap-gene-171.26	Initial_vs_Flower_bud	0.771795	up	0.00765	0.0391281
Glutaredoxin family protein	VaccDscaff39-augustus-gene-2.33	Initial_vs_Flower_bud	0.781243	up	0.0094	0.0461862
THY5 protein	VaccDscaff28-snap-gene-90.32	Initial_vs_Flower_bud	0.799176	up	5e-05	0.000509113
CCR4-NOT transcription complex subunit 9	VaccDscaff93-snap-gene-1.32	Initial_vs_Flower_bud	0.799863	up	0.00265	0.0163189
SU(VAR)3-9 homolog 2	VaccDscaff35-augustus-gene-105.20	Initial_vs_Flower_bud	0.80061	up	0.00255	0.015794
ADP-glucose pyrophosphorylase small subunit 2	VaccDscaff2-snap-gene-154.34	Initial_vs_Flower_bud	0.809617	up	0.00085	0.00632968
methionine aminopeptidase 1A	VaccDscaff1311-augustus-gene-0.6	Initial_vs_Flower_bud	0.818129	up	0.00235	0.0147509
Adenine nucleotide alpha hydrolases-like superfamily protein	VaccDscaff4-augustus-gene-31.64	Initial_vs_Flower_bud	0.819208	up	5e-05	0.000509113
autoinhibited H[+]-ATPase	VaccDscaff4-augustus-gene-407.24	Initial_vs_Flower_bud	0.819963	up	0.00085	0.00632968
homeotic protein knotted-1	VaccDscaff23-augustus-gene-291.17	Initial_vs_Flower_bud	0.824042	up	5e-05	0.000509113
isoprenoid F	VaccDscaff28-augustus-gene-36.37	Initial_vs_Flower_bud	0.82794	up	5e-05	0.000509113
GPCR-type G protein 2	VaccDscaff29-augustus-gene-14.22	Initial_vs_Flower_bud	0.8299	up	0.0046	0.0258662
cleavage and polyadenylation specificity factor 73-I	VaccDscaff34-snap-gene-222.32	Initial_vs_Flower_bud	0.83167	up	0.00225	0.0142218
TBC1 domain family, member 8	VaccDscaff17-augustus-gene-37.32	Initial_vs_Flower_bud	0.834557	up	0.0002	0.00178731
glutathione transferase lambda 2	VaccDscaff29-snap-gene-169.30	Initial_vs_Flower_bud	0.834705	up	0.0061	0.0324943
zeaxanthin epoxidase, chloroplastic-like	VaccDscaff1574-augustus-gene-0.3	Initial_vs_Flower_bud	0.835392	up	0.0024	0.0150115
protein transporter SEC23	VaccDscaff4-augustus-gene-126.23	Initial_vs_Flower_bud	0.838111	up	0.0009	0.00664913
LSD1-like 3	VaccDscaff18-processed-gene-19.0	Initial_vs_Flower_bud	0.841268	up	0.0013	0.0090707
Transmembrane amino acid transporter family protein	VaccDscaff23-processed-gene-59.7	Initial_vs_Flower_bud	0.841301	up	5e-05	0.000509113
time for coffee	VaccDscaff4-processed-gene-93.25	Initial_vs_Flower_bud	0.841456	up	5e-05	0.000509113
with no lysine (K) kinase 4	VaccDscaff34-augustus-gene-285.28	Initial_vs_Flower_bud	0.842712	up	0.0095	0.0465232
Phosphoribulokinase / Uridine kinase family	VaccDscaff3-snap-gene-129.26	Initial_vs_Flower_bud	0.847839	up	5e-05	0.000509113
UDP-D-glucuronate 4-epimerase 1	VaccDscaff70-processed-gene-3.3	Initial_vs_Flower_bud	0.855954	up	0.00035	0.00292308
TBP-associated factor II 15	VaccDscaff383-augustus-gene-0.19	Initial_vs_Flower_bud	0.864447	up	0.0001	0.000960986
purple acid phosphatase 18	VaccDscaff1-augustus-gene-438.29	Initial_vs_Flower_bud	0.867464	up	0.0026	0.0160553
PDI-like 1-6	VaccDscaff34-augustus-gene-29.26	Initial_vs_Flower_bud	0.869661	up	0.00275	0.0168337
Ribosomal protein L10 family protein	VaccDscaff47-augustus-gene-109.28	Initial_vs_Flower_bud	0.870069	up	0.00065	0.00502564
Protein phosphatase 2A, regulatory subunit PR55	VaccDscaff4-augustus-gene-417.23	Initial_vs_Flower_bud	0.870502	up	5e-05	0.000509113
Nucleotide-sugar transporter family protein	VaccDscaff3-augustus-gene-84.39	Initial_vs_Flower_bud	0.881253	up	0.002	0.0128861
acetyl-CoA carboxylase beta subunit	VaccDscaff22-augustus-gene-77.23	Initial_vs_Flower_bud	0.88478	up	0.0003	0.00255629
Ras-related small GTP-binding family protein	VaccDscaff34-snap-gene-212.34	Initial_vs_Flower_bud	0.886153	up	0.00895	0.0444405
ubiquitin-conjugating enzyme E2-17 kDa	VaccDscaff28-augustus-gene-30.21	Initial_vs_Flower_bud	0.887535	up	5e-05	0.000509113
Translation protein SH3-like family protein	VaccDscaff32-processed-gene-269.3	Initial_vs_Flower_bud	0.890611	up	0.00185	0.0120815
minichromosome maintenance 9	VaccDscaff3-snap-gene-31.33	Initial_vs_Flower_bud	0.90133	up	0.0026	0.0160553
zinc finger CCCH-type with G patch domain-containing protein	VaccDscaff38-augustus-gene-29.25	Initial_vs_Flower_bud	0.902946	up	0.0022	0.0139552
non-intrinsic ABC protein 4	VaccDscaff24-snap-gene-36.37	Initial_vs_Flower_bud	0.904427	up	5e-05	0.000509113
G1 to S phase transition 1	VaccDscaff70-augustus-gene-7.57	Initial_vs_Flower_bud	0.90609	up	5e-05	0.000509113
Coatomer, alpha subunit	VaccDscaff30-processed-gene-116.8	Initial_vs_Flower_bud	0.910233	up	0.00705	0.0366072
putative ransport protein Yos1	VaccDscaff48-processed-gene-72.20	Initial_vs_Flower_bud	0.910952	up	0.0069	0.0359626
cullin4	VaccDscaff28-augustus-gene-139.23	Initial_vs_Flower_bud	0.91623	up	0.00015	0.00138565
sphinganine C4-monooxygenase 1	VaccDscaff3-augustus-gene-82.28	Initial_vs_Flower_bud	0.916853	up	0.0001	0.000960986
Pentatricopeptide repeat (PPR) superfamily protein	VaccDscaff44-snap-gene-88.32	Initial_vs_Flower_bud	0.919344	up	5e-05	0.000509113
plasma membrane intrinsic protein 3	VaccDscaff14-augustus-gene-386.31	Initial_vs_Flower_bud	0.919635	up	0.0002	0.00178731
auxin signaling F-box 2	VaccDscaff121-augustus-gene-1.34	Initial_vs_Flower_bud	0.920571	up	0.0004	0.00328645
Transcription elongation factor (TFIIS) family protein	VaccDscaff39-snap-gene-112.32	Initial_vs_Flower_bud	0.921648	up	0.00295	0.017862
26S proteasome regulatory subunit S2 1A	VaccDscaff39-snap-gene-285.26	Initial_vs_Flower_bud	0.922079	up	0.0048	0.0267622
peptide transporter 2	VaccDscaff28-augustus-gene-158.33	Initial_vs_Flower_bud	0.925449	up	5e-05	0.000509113
molybdenum cofactor sulfurase (LOS5) (ABA3)	VaccDscaff29-processed-gene-73.1	Initial_vs_Flower_bud	0.927659	up	0.00385	0.0222963
wings apart-like	VaccDscaff24-snap-gene-230.28	Initial_vs_Flower_bud	0.928712	up	0.00085	0.00632968
ARM repeat protein interacting with ABF2	VaccDscaff24-snap-gene-25.33	Initial_vs_Flower_bud	0.930144	up	0.01035	0.0498898
RNA helicase, ATP-dependent, SK12/DOB1 protein	VaccDscaff95-augustus-gene-5.44	Initial_vs_Flower_bud	0.930624	up	5e-05	0.000509113
expansin A13	VaccDscaff42-augustus-gene-35.22	Initial_vs_Flower_bud	0.933981	up	5e-05	0.000509113
urease accessory protein G	VaccDscaff42-snap-gene-76.37	Initial_vs_Flower_bud	0.934187	up	0.0007	0.00535742
TATA-box-binding protein-like	VaccDscaff44-augustus-gene-245.19	Initial_vs_Flower_bud	0.93664	up	0.00205	0.0131537
Ergosterol biosynthesis ERG4/ERG24 family	VaccDscaff224-augustus-gene-0.22	Initial_vs_Flower_bud	0.939071	up	5e-05	0.000509113
tubulin beta-2 chain-like	VaccDscaff34-augustus-gene-256.31	Initial_vs_Flower_bud	0.940771	up	0.0011	0.00788288
60S ribosomal protein L39-3-like	VaccDscaff13-snap-gene-86.25	Initial_vs_Flower_bud	0.951702	up	5e-05	0.000509113
LURP-one-like protein (DUF567)	VaccDscaff34-augustus-gene-42.48	Initial_vs_Flower_bud	0.955252	up	0.00015	0.00138565
ARM repeat superfamily protein	VaccDscaff42-augustus-gene-7.36	Initial_vs_Flower_bud	0.968989	up	0.0033	0.0196304
Galactosyltransferase family protein	VaccDscaff1316-snap-gene-0.8	Initial_vs_Flower_bud	0.972365	up	5e-05	0.000509113
Sugar isomerase (SIS) family protein	VaccDscaff48-augustus-gene-26.22	Initial_vs_Flower_bud	0.973872	up	5e-05	0.000509113
PDI-like 1-4	VaccDscaff47-augustus-gene-76.28	Initial_vs_Flower_bud	0.97434	up	0.00125	0.0087766
transcript elongation factor IIS	VaccDscaff34-augustus-gene-288.30	Initial_vs_Flower_bud	0.974759	up	0.00255	0.015794
Ran BP2/NZF zinc finger-like superfamily protein	VaccDscaff3-augustus-gene-197.24	Initial_vs_Flower_bud	0.975197	up	5e-05	0.000509113
DNA-directed RNA polymerase II subunit RPB7	VaccDscaff47-augustus-gene-104.25	Initial_vs_Flower_bud	0.980889	up	0.00295	0.017862
ARM repeat superfamily protein	VaccDscaff4-augustus-gene-410.21	Initial_vs_Flower_bud	0.984061	up	5e-05	0.000509113
NODAL modulator 1	VaccDscaff47-augustus-gene-194.20	Initial_vs_Flower_bud	0.989287	up	0.00185	0.0120815
early nodulin-like protein 13	VaccDscaff797-processed-gene-0.1	Initial_vs_Flower_bud	0.989703	up	5e-05	0.000509113
POTATP1	VaccDscaff24-snap-gene-57.32	Initial_vs_Flower_bud	0.996115	up	5e-05	0.000509113
carboxylesterase	VaccDscaff217-snap-gene-0.32	Initial_vs_Flower_bud	0.998116	up	5e-05	0.000509113
DHHC-type zinc finger family protein	VaccDscaff3-snap-gene-84.49	Initial_vs_Flower_bud	1.00066	up	5e-05	0.000509113
pyruvate kinase isozyme A, chloroplastic-like	VaccDscaff3-processed-gene-15.8	Initial_vs_Flower_bud	1.00076	up	5e-05	0.000509113
CELLULOSE SYNTHASE INTERACTIVE 3	VaccDscaff3-processed-gene-244.4	Initial_vs_Flower_bud	1.00186	up	5e-05	0.000509113
protein phosphatase 6 regulatory subunit 3	VaccDscaff24-snap-gene-99.18	Initial_vs_Flower_bud	1.00389	up	0.0041	0.0235034
Metallo-hydrolase/oxidoreductase superfamily protein	VaccDscaff28-snap-gene-325.31	Initial_vs_Flower_bud	1.00451	up	5e-05	0.000509113
WRKY family transcription factor	VaccDscaff39-augustus-gene-278.17	Initial_vs_Flower_bud	1.00514	up	5e-05	0.000509113
cysteine-rich RLK (RECEPTOR-like protein kinase) 23	VaccDscaff24-processed-gene-195.17	Initial_vs_Flower_bud	1.00794	up	0.00765	0.0391281
probable ethylene response sensor 1	VaccDscaff51-augustus-gene-9.34	Initial_vs_Flower_bud	1.0168	up	0.00355	0.0208507
Leucine-rich receptor-like protein kinase family protein	VaccDscaff44-augustus-gene-114.30	Initial_vs_Flower_bud	1.02135	up	5e-05	0.000509113
thylakoid lumen 18.3 kDa protein	VaccDscaff18-snap-gene-104.20	Initial_vs_Flower_bud	1.02235	up	0.0022	0.0139552
dymeclin	VaccDscaff5-augustus-gene-70.28	Initial_vs_Flower_bud	1.02311	up	0.00035	0.00292308
ornithine aminotransferase, mitochondrial-like	VaccDscaff24-augustus-gene-123.31	Initial_vs_Flower_bud	1.02399	up	5e-05	0.000509113
Calcineurin-like metallo-phosphoesterase superfamily protein	VaccDscaff34-snap-gene-174.25	Initial_vs_Flower_bud	1.03003	up	5e-05	0.000509113
plastidic type i signal peptidase 1	VaccDscaff69-augustus-gene-6.43	Initial_vs_Flower_bud	1.0341	up	5e-05	0.000509113
secreted protein	VaccDscaff28-augustus-gene-144.30	Initial_vs_Flower_bud	1.03775	up	5e-05	0.000509113
Leucine-rich repeat protein kinase family protein	VaccDscaff4-augustus-gene-215.25	Initial_vs_Flower_bud	1.0382	up	0.0002	0.00178731
calcium ATPase 2	VaccDscaff32-augustus-gene-270.23	Initial_vs_Flower_bud	1.03829	up	5e-05	0.000509113
photolyase 1	VaccDscaff91-processed-gene-5.14	Initial_vs_Flower_bud	1.04252	up	5e-05	0.000509113
BTB and TAZ domain protein 4	VaccDscaff18-augustus-gene-258.26	Initial_vs_Flower_bud	1.04289	up	0.0002	0.00178731
RNA-binding (RRM/RBD/RNP motifs) family protein	VaccDscaff513-processed-gene-0.1	Initial_vs_Flower_bud	1.04394	up	5e-05	0.000509113
auxin response factor 6-like	VaccDscaff24-augustus-gene-127.18	Initial_vs_Flower_bud	1.04434	up	5e-05	0.000509113
glutathione S-transferase PHI 9	VaccDscaff3-augustus-gene-210.28	Initial_vs_Flower_bud	1.04494	up	5e-05	0.000509113
methionine-oxo-acid transaminase, PLP-dependent	VaccDscaff3-snap-gene-255.33	Initial_vs_Flower_bud	1.04782	up	0.0015	0.0101994
annexin 2	VaccDscaff39-augustus-gene-87.22	Initial_vs_Flower_bud	1.04853	up	5e-05	0.000509113
malonyl-CoA-acyl carrier protein transacylase	VaccDscaff24-augustus-gene-66.36	Initial_vs_Flower_bud	1.04857	up	5e-05	0.000509113
Glycosyl hydrolases family 31 protein	VaccDscaff39-snap-gene-144.23	Initial_vs_Flower_bud	1.04941	up	0.001	0.0072762
RAB3 GTPase activating protein catalytic subunit 1 L homeolog	VaccDscaff24-augustus-gene-66.46	Initial_vs_Flower_bud	1.05033	up	0.00015	0.00138565
Cellulose-synthase-like C5	VaccDscaff224-snap-gene-1.39	Initial_vs_Flower_bud	1.0532	up	0.0043	0.024449
MAP kinase kinase 9	VaccDscaff2-processed-gene-364.26	Initial_vs_Flower_bud	1.05405	up	5e-05	0.000509113
protein disulfide isomerase-like 2-3	VaccDscaff37-snap-gene-14.41	Initial_vs_Flower_bud	1.05527	up	5e-05	0.000509113
NAD(P)-binding Rossmann-fold superfamily protein	VaccDscaff3-processed-gene-386.25	Initial_vs_Flower_bud	1.05696	up	0.00335	0.0198581
P-loop containing nucleoside triphosphate hydrolases superfamily protein	VaccDscaff21-snap-gene-83.40	Initial_vs_Flower_bud	1.05719	up	5e-05	0.000509113
VIRE2 interacting protein 2	VaccDscaff9-augustus-gene-115.29	Initial_vs_Flower_bud	1.05748	up	0.00925	0.0455824
Auxin efflux carrier family protein	VaccDscaff44-augustus-gene-194.25	Initial_vs_Flower_bud	1.05757	up	0.00325	0.0193808
histone H2A 12	VaccDscaff47-augustus-gene-91.31	Initial_vs_Flower_bud	1.05964	up	5e-05	0.000509113
squamosa promoter binding protein-like 1	VaccDscaff51-augustus-gene-1.26	Initial_vs_Flower_bud	1.06232	up	0.0083	0.041832
spore coat protein	VaccDscaff27-augustus-gene-312.34	Initial_vs_Flower_bud	1.06492	up	0.00725	0.0374455
MINDY lysine 48 deubiquitinase 3	VaccDscaff23-snap-gene-185.32	Initial_vs_Flower_bud	1.06693	up	5e-05	0.000509113
immunoglobulin mu DNA binding protein 2	VaccDscaff29-augustus-gene-12.29	Initial_vs_Flower_bud	1.06889	up	0.00055	0.00434745
cyclin-dependent kinase F-4-like	VaccDscaff47-augustus-gene-10.21	Initial_vs_Flower_bud	1.069	up	0.00285	0.0173568
ZIP metal ion transporter family	VaccDscaff28-processed-gene-163.2	Initial_vs_Flower_bud	1.06905	up	0.0004	0.00328645
P-loop containing nucleoside triphosphate hydrolases superfamily protein	VaccDscaff4-snap-gene-164.27	Initial_vs_Flower_bud	1.07187	up	0.0081	0.0409946
TEOSINTE BRANCHED 1, cycloidea and PCF transcription factor 5	VaccDscaff4-processed-gene-349.4	Initial_vs_Flower_bud	1.07371	up	5e-05	0.000509113
cold shock domain protein 1	VaccDscaff42-processed-gene-20.7	Initial_vs_Flower_bud	1.07824	up	0.0007	0.00535742
SERINE CARBOXYPEPTIDASE-LIKE 49	VaccDscaff48-augustus-gene-49.41	Initial_vs_Flower_bud	1.08257	up	0.00475	0.0265277
lysine demethylase 5B	VaccDscaff49-augustus-gene-44.25	Initial_vs_Flower_bud	1.08292	up	5e-05	0.000509113
fumarase 1	VaccDscaff24-augustus-gene-7.30	Initial_vs_Flower_bud	1.08492	up	0.0009	0.00664913
2-oxoglutarate (2OG) and Fe(II)-dependent oxygenase superfamily protein	VaccDscaff42-augustus-gene-20.26	Initial_vs_Flower_bud	1.09027	up	0.00105	0.00757987
transmembrane 131 like	VaccDscaff7-augustus-gene-253.19	Initial_vs_Flower_bud	1.09284	up	5e-05	0.000509113
beta tubulin 7	VaccDscaff24-augustus-gene-143.52	Initial_vs_Flower_bud	1.0975	up	0.00975	0.047509
ARM repeat superfamily protein	VaccDscaff47-snap-gene-158.24	Initial_vs_Flower_bud	1.10294	up	0.0017	0.0112779
phosphofructokinase 7	VaccDscaff113-snap-gene-2.26	Initial_vs_Flower_bud	1.10316	up	0.00415	0.0237389
ARM repeat superfamily protein	VaccDscaff4-snap-gene-242.33	Initial_vs_Flower_bud	1.10412	up	0.00865	0.0432732
hypothetical protein	VaccDscaff37-snap-gene-222.28	Initial_vs_Flower_bud	1.10661	up	0.00215	0.0136909
Nucleotide-sugar transporter family protein	VaccDscaff46-processed-gene-12.16	Initial_vs_Flower_bud	1.10775	up	0.0004	0.00328645
cytochrome P450 734A6-like	VaccDscaff1135-augustus-gene-0.7	Initial_vs_Flower_bud	1.11112	up	0.0009	0.00664913
Vps51/Vps67 family (components of vesicular transport) protein	VaccDscaff47-augustus-gene-193.37	Initial_vs_Flower_bud	1.11315	up	0.0003	0.00255629
histidine kinase 2	VaccDscaff1-processed-gene-389.11	Initial_vs_Flower_bud	1.11936	up	0.0001	0.000960986
NADH-ubiquinone oxidoreductase-like protein	VaccDscaff48-augustus-gene-108.36	Initial_vs_Flower_bud	1.12156	up	0.0005	0.00400018
Phosphoinositide phosphatase family protein	VaccDscaff158-augustus-gene-0.19	Initial_vs_Flower_bud	1.12291	up	0.0005	0.00400018
D-3-phosphoglycerate dehydrogenase	VaccDscaff23-augustus-gene-311.35	Initial_vs_Flower_bud	1.12295	up	5e-05	0.000509113
pyruvate dehydrogenase E1 component subunit beta-1, mitochondrial-like	VaccDscaff4-augustus-gene-389.35	Initial_vs_Flower_bud	1.12627	up	5e-05	0.000509113
MAP kinase kinase 2	VaccDscaff42-augustus-gene-222.32	Initial_vs_Flower_bud	1.12941	up	5e-05	0.000509113
ARM repeat superfamily protein	VaccDscaff3-augustus-gene-317.27	Initial_vs_Flower_bud	1.13065	up	0.0003	0.00255629
1,2-alpha-L-fucosidase	VaccDscaff3-augustus-gene-12.35	Initial_vs_Flower_bud	1.13589	up	5e-05	0.000509113
cellulose synthase-like A02	VaccDscaff24-augustus-gene-112.18	Initial_vs_Flower_bud	1.13862	up	5e-05	0.000509113
canopy FGF signaling regulator 1	VaccDscaff12-augustus-gene-34.33	Initial_vs_Flower_bud	1.13905	up	0.00315	0.0188828
TBP-associated factor 11	VaccDscaff82-augustus-gene-4.24	Initial_vs_Flower_bud	1.13907	up	0.00015	0.00138565
Proteasome component (PCI) domain protein	VaccDscaff23-processed-gene-339.3	Initial_vs_Flower_bud	1.14052	up	5e-05	0.000509113
CBL-interacting protein kinase 12	VaccDscaff248-augustus-gene-0.47	Initial_vs_Flower_bud	1.14312	up	0.0024	0.0150115
TRICHOME BIREFRINGENCE-LIKE 27	VaccDscaff3-augustus-gene-172.31	Initial_vs_Flower_bud	1.14891	up	0.00085	0.00632968
Radical SAM superfamily protein	VaccDscaff3-augustus-gene-265.17	Initial_vs_Flower_bud	1.14909	up	0.0001	0.000960986
PDI-like 5-3	VaccDscaff797-augustus-gene-0.15	Initial_vs_Flower_bud	1.14963	up	5e-05	0.000509113
DnaJ heat shock protein family (Hsp40) member B5	VaccDscaff38-augustus-gene-221.19	Initial_vs_Flower_bud	1.15575	up	5e-05	0.000509113
early-responsive to dehydration stress protein (ERD4)	VaccDscaff3-augustus-gene-400.27	Initial_vs_Flower_bud	1.1568	up	0.00705	0.0366072
ethylene responsive element binding factor 4	VaccDscaff1-processed-gene-416.4	Initial_vs_Flower_bud	1.16139	up	5e-05	0.000509113
Homeodomain-like transcriptional regulator	VaccDscaff39-snap-gene-247.31	Initial_vs_Flower_bud	1.16228	up	5e-05	0.000509113
malate dehydrogenase	VaccDscaff4-snap-gene-65.63	Initial_vs_Flower_bud	1.16384	up	5e-05	0.000509113
Calcium-binding tetratricopeptide family protein	VaccDscaff23-processed-gene-353.2	Initial_vs_Flower_bud	1.16469	up	0.00025	0.00217815
structural maintenance of chromosomes 6A	VaccDscaff29-snap-gene-87.28	Initial_vs_Flower_bud	1.16636	up	5e-05	0.000509113
helicase domain-containing protein / IBR domain-containing protein / zinc finger protein-like protein	VaccDscaff47-augustus-gene-81.33	Initial_vs_Flower_bud	1.16703	up	0.00015	0.00138565
glutamate--tRNA ligase, chloroplastic/mitochondrial	VaccDscaff4-augustus-gene-309.27	Initial_vs_Flower_bud	1.16984	up	0.0016	0.0107463
ZIM-LIKE 2	VaccDscaff18-augustus-gene-54.31	Initial_vs_Flower_bud	1.17211	up	0.0006	0.00468546
CONSTANS-like 3	VaccDscaff52-augustus-gene-14.21	Initial_vs_Flower_bud	1.17303	up	0.00085	0.00632968
Tetratricopeptide repeat (TPR)-like superfamily protein	VaccDscaff1-snap-gene-300.42	Initial_vs_Flower_bud	1.17322	up	5e-05	0.000509113
neuroblastoma-amplified sequence protein	VaccDscaff29-augustus-gene-29.26	Initial_vs_Flower_bud	1.17574	up	0.00015	0.00138565
Leucine-rich repeat protein kinase family protein	VaccDscaff18-augustus-gene-236.20	Initial_vs_Flower_bud	1.17722	up	0.00085	0.00632968
calcium-dependent protein kinase 4-like	VaccDscaff30-augustus-gene-77.33	Initial_vs_Flower_bud	1.17748	up	5e-05	0.000509113
family with sequence similarity 91 member A1	VaccDscaff41-snap-gene-62.35	Initial_vs_Flower_bud	1.18139	up	5e-05	0.000509113
Ribosomal protein L19 family protein	VaccDscaff46-augustus-gene-42.33	Initial_vs_Flower_bud	1.18144	up	0.00465	0.0260951
global transcription factor group E7	VaccDscaff34-augustus-gene-159.24	Initial_vs_Flower_bud	1.18473	up	0.00475	0.0265277
nudix hydrolase homolog 23	VaccDscaff1-snap-gene-303.40	Initial_vs_Flower_bud	1.18707	up	5e-05	0.000509113
RING-H2 group F1A	VaccDscaff4-snap-gene-100.36	Initial_vs_Flower_bud	1.19393	up	5e-05	0.000509113
Calcium-binding tetratricopeptide family protein	VaccDscaff23-processed-gene-352.0	Initial_vs_Flower_bud	1.19418	up	5e-05	0.000509113
amino acid permease 3	VaccDscaff3-augustus-gene-242.34	Initial_vs_Flower_bud	1.19645	up	0.0083	0.041832
Cytochrome c oxidase, subunit III	VaccDscaff24-snap-gene-343.34	Initial_vs_Flower_bud	1.19685	up	0.002	0.0128861
probable U3 small nucleolar RNA-associated protein 11	VaccDscaff29-augustus-gene-296.29	Initial_vs_Flower_bud	1.19902	up	5e-05	0.000509113
dCTP pyrophosphatase 1	VaccDscaff47-augustus-gene-134.34	Initial_vs_Flower_bud	1.20022	up	0.0006	0.00468546
IBR domain-containing protein	VaccDscaff3-augustus-gene-267.16	Initial_vs_Flower_bud	1.20147	up	0.00085	0.00632968
alpha/beta-Hydrolases superfamily protein	VaccDscaff24-augustus-gene-159.31	Initial_vs_Flower_bud	1.20163	up	5e-05	0.000509113
HAESA-like 2	VaccDscaff18-augustus-gene-267.23	Initial_vs_Flower_bud	1.20227	up	0.0001	0.000960986
O-Glycosyl hydrolases family 17 protein	VaccDscaff47-augustus-gene-138.40	Initial_vs_Flower_bud	1.2076	up	0.0021	0.0134248
metal ion transporter, putative	VaccDscaff35-augustus-gene-306.29	Initial_vs_Flower_bud	1.20766	up	5e-05	0.000509113
Plant neutral invertase family protein	VaccDscaff30-snap-gene-103.14	Initial_vs_Flower_bud	1.2085	up	5e-05	0.000509113
AHA1, activator of heat shock protein ATPase 1	VaccDscaff29-augustus-gene-345.29	Initial_vs_Flower_bud	1.21183	up	0.0004	0.00328645
ubiquitin-specific protease 12	VaccDscaff48-snap-gene-36.52	Initial_vs_Flower_bud	1.21208	up	5e-05	0.000509113
inositol transporter 2	VaccDscaff24-augustus-gene-124.25	Initial_vs_Flower_bud	1.21218	up	5e-05	0.000509113
ADP/ATP carrier 3	VaccDscaff39-augustus-gene-250.26	Initial_vs_Flower_bud	1.21323	up	0.0005	0.00400018
Glycosyl hydrolase family 38 protein	VaccDscaff4-snap-gene-392.52	Initial_vs_Flower_bud	1.21455	up	0.00525	0.0287909
Nucleotide/sugar transporter family protein	VaccDscaff1-augustus-gene-402.34	Initial_vs_Flower_bud	1.21578	up	5e-05	0.000509113
receptor like protein 51	VaccDscaff24-processed-gene-262.6	Initial_vs_Flower_bud	1.22339	up	5e-05	0.000509113
mitochondrial outer membrane protein porin of 36 kDa-like	VaccDscaff3-augustus-gene-165.18	Initial_vs_Flower_bud	1.22356	up	0.0005	0.00400018
RNA polymerase beta' chain	VaccDscaff20-snap-gene-111.28	Initial_vs_Flower_bud	1.23056	up	0.00075	0.00568581
membrane-associated kinase regulator	VaccDscaff26-augustus-gene-49.32	Initial_vs_Flower_bud	1.23216	up	0.0086	0.0430663
WD repeat domain 3	VaccDscaff26-augustus-gene-233.24	Initial_vs_Flower_bud	1.23759	up	0.00105	0.00757987
decapping 5	VaccDscaff28-snap-gene-237.36	Initial_vs_Flower_bud	1.23859	up	5e-05	0.000509113
photosystem II protein D1	VaccDscaff7-snap-gene-154.18	Initial_vs_Flower_bud	1.23937	up	5e-05	0.000509113
calmodulin-binding receptor-like cytoplasmic kinase 3	VaccDscaff39-processed-gene-37.6	Initial_vs_Flower_bud	1.24014	up	0.00855	0.0428607
protein DEHYDRATION-INDUCED 19 homolog 4-like	VaccDscaff24-augustus-gene-240.26	Initial_vs_Flower_bud	1.24268	up	0.00265	0.0163189
SPX domain-containing protein 2 (SPX2)	VaccDscaff28-augustus-gene-88.20	Initial_vs_Flower_bud	1.24584	up	0.00295	0.017862
repressor of lrx1	VaccDscaff12-augustus-gene-41.25	Initial_vs_Flower_bud	1.24876	up	0.00335	0.0198581
LYR family of Fe/S cluster biogenesis protein	VaccDscaff30-augustus-gene-112.37	Initial_vs_Flower_bud	1.2496	up	0.0007	0.00535742
ACT domain repeat 1	VaccDscaff32-augustus-gene-267.33	Initial_vs_Flower_bud	1.25189	up	0.00165	0.0110142
phosphatidylinositol synthase 1	VaccDscaff42-augustus-gene-204.30	Initial_vs_Flower_bud	1.25225	up	5e-05	0.000509113
Plant invertase/pectin methylesterase inhibitor superfamily	VaccDscaff39-augustus-gene-130.23	Initial_vs_Flower_bud	1.25267	up	0.0088	0.0438342
trehalose phosphatase/synthase 11	VaccDscaff39-augustus-gene-6.34	Initial_vs_Flower_bud	1.25425	up	0.00095	0.00696513
Nuclear pore localization protein NPL4	VaccDscaff1-snap-gene-314.28	Initial_vs_Flower_bud	1.25538	up	0.00015	0.00138565
RING-finger protein for embryogenesi	VaccDscaff28-augustus-gene-185.26	Initial_vs_Flower_bud	1.25931	up	0.00225	0.0142218
Auxin efflux carrier family protein	VaccDscaff42-snap-gene-27.54	Initial_vs_Flower_bud	1.2617	up	0.00545	0.0296438
Calmodulin-binding protein	VaccDscaff3-snap-gene-76.46	Initial_vs_Flower_bud	1.26252	up	5e-05	0.000509113
peptide-N-glycanase 1	VaccDscaff1409-snap-gene-0.3	Initial_vs_Flower_bud	1.26557	up	5e-05	0.000509113
subtilase 1.3	VaccDscaff29-processed-gene-77.3	Initial_vs_Flower_bud	1.26916	up	0.0009	0.00664913
general regulatory factor 8	VaccDscaff23-augustus-gene-271.16	Initial_vs_Flower_bud	1.27252	up	5e-05	0.000509113
Avirulence induced gene (AIG1) family protein	VaccDscaff39-augustus-gene-36.30	Initial_vs_Flower_bud	1.27621	up	0.0029	0.0176082
Dihydroneopterin aldolase	VaccDscaff29-augustus-gene-263.28	Initial_vs_Flower_bud	1.27835	up	5e-05	0.000509113
PLC-like phosphodiesterases superfamily protein	VaccDscaff4-augustus-gene-349.23	Initial_vs_Flower_bud	1.28011	up	5e-05	0.000509113
ATP synthase CF1 beta subunit	VaccDscaff18-processed-gene-303.26	Initial_vs_Flower_bud	1.28055	up	0.0001	0.000960986
delta(3,5),delta(2,4)-dienoyl-CoA isomerase 1	VaccDscaff3-snap-gene-201.26	Initial_vs_Flower_bud	1.28129	up	5e-05	0.000509113
GSH-induced LITAF domain protein	VaccDscaff3-snap-gene-202.35	Initial_vs_Flower_bud	1.28156	up	0.00875	0.0436793
Transducin/WD40 repeat-like superfamily protein	VaccDscaff111-augustus-gene-3.54	Initial_vs_Flower_bud	1.28211	up	0.0002	0.00178731
WUSCHEL related homeobox 13	VaccDscaff40-augustus-gene-280.25	Initial_vs_Flower_bud	1.28374	up	0.0002	0.00178731
Oxysterol-binding family protein	VaccDscaff1-augustus-gene-161.26	Initial_vs_Flower_bud	1.28487	up	0.00175	0.0115544
mediator 21	VaccDscaff24-augustus-gene-182.29	Initial_vs_Flower_bud	1.28814	up	0.00045	0.00364749
RS2-interacting KH protein	VaccDscaff18-snap-gene-321.65	Initial_vs_Flower_bud	1.29043	up	5e-05	0.000509113
ATP sulfurylase 1	VaccDscaff4-augustus-gene-55.33	Initial_vs_Flower_bud	1.29179	up	0.00035	0.00292308
glucan endo-1,3-beta-glucosidase, acidic	VaccDscaff35-augustus-gene-84.23	Initial_vs_Flower_bud	1.29192	up	0.00055	0.00434745
stomatal cytokinesis defective / SCD1 protein (SCD1)	VaccDscaff18-snap-gene-9.30	Initial_vs_Flower_bud	1.29447	up	0.00055	0.00434745
S-adenosyl-L-methionine-dependent methyltransferases superfamily protein	VaccDscaff23-snap-gene-289.25	Initial_vs_Flower_bud	1.29543	up	0.00575	0.0309915
Nucleotide-sugar transporter family protein	VaccDscaff7-snap-gene-11.38	Initial_vs_Flower_bud	1.29812	up	0.00165	0.0110142
nucleosome assembly protein 1;2-like	VaccDscaff47-augustus-gene-136.29	Initial_vs_Flower_bud	1.30173	up	0.0007	0.00535742
peroxin 7	VaccDscaff4-augustus-gene-218.24	Initial_vs_Flower_bud	1.30286	up	0.00055	0.00434745
uncharacterized LOC100280451	VaccDscaff48-augustus-gene-88.47	Initial_vs_Flower_bud	1.30383	up	5e-05	0.000509113
Aldolase superfamily protein	VaccDscaff3-snap-gene-105.32	Initial_vs_Flower_bud	1.30403	up	5e-05	0.000509113
longifolia1	VaccDscaff47-processed-gene-170.15	Initial_vs_Flower_bud	1.30468	up	0.0009	0.00664913
heat shock transcription factor B2A	VaccDscaff29-augustus-gene-66.45	Initial_vs_Flower_bud	1.30488	up	0.00055	0.00434745
purple acid phosphatase 8	VaccDscaff1-augustus-gene-144.24	Initial_vs_Flower_bud	1.30557	up	0.00935	0.045984
SET domain protein 16	VaccDscaff29-augustus-gene-39.27	Initial_vs_Flower_bud	1.31265	up	0.0093	0.0457814
methyltransferase like 21C	VaccDscaff42-processed-gene-92.5	Initial_vs_Flower_bud	1.32414	up	0.00465	0.0260951
protein kinase family protein / peptidoglycan-binding LysM domain-containing protein	VaccDscaff4-processed-gene-181.0	Initial_vs_Flower_bud	1.32422	up	0.00265	0.0163189
patatin-like phospholipase domain containing 2	VaccDscaff45-augustus-gene-86.31	Initial_vs_Flower_bud	1.32567	up	0.0015	0.0101994
pleiotropic regulatory locus 1	VaccDscaff1-augustus-gene-30.36	Initial_vs_Flower_bud	1.32607	up	0.0002	0.00178731
Clathrin adaptor complexes medium subunit family protein	VaccDscaff46-augustus-gene-53.21	Initial_vs_Flower_bud	1.32827	up	0.0049	0.0272038
vesicle-associated membrane protein 711	VaccDscaff28-augustus-gene-83.23	Initial_vs_Flower_bud	1.32958	up	0.0004	0.00328645
casein kinase I-like 3	VaccDscaff69-processed-gene-7.7	Initial_vs_Flower_bud	1.33066	up	0.0095	0.0465232
Stress responsive A/B Barrel Domain-containing protein	VaccDscaff47-augustus-gene-57.24	Initial_vs_Flower_bud	1.33468	up	5e-05	0.000509113
TRS120	VaccDscaff18-snap-gene-179.40	Initial_vs_Flower_bud	1.339	up	0.00725	0.0374455
mitochondrial ferredoxin 1	VaccDscaff4-augustus-gene-409.32	Initial_vs_Flower_bud	1.3456	up	0.0022	0.0139552
succinate dehydrogenase subunit	VaccDscaff9-augustus-gene-344.26	Initial_vs_Flower_bud	1.34676	up	5e-05	0.000509113
ENTH/ANTH/VHS superfamily protein	VaccDscaff28-augustus-gene-190.20	Initial_vs_Flower_bud	1.34924	up	0.0004	0.00328645
Leucine-rich receptor-like protein kinase family protein	VaccDscaff39-augustus-gene-99.39	Initial_vs_Flower_bud	1.3517	up	0.00495	0.0274362
3-hydroxyacyl-CoA dehydratase 1	VaccDscaff4-augustus-gene-62.40	Initial_vs_Flower_bud	1.35237	up	0.0089	0.0442415
Zinc finger C-x8-C-x5-C-x3-H type family protein	VaccDscaff51-augustus-gene-16.29	Initial_vs_Flower_bud	1.35757	up	5e-05	0.000509113
Sec14p-like phosphatidylinositol transfer family protein	VaccDscaff397-snap-gene-0.32	Initial_vs_Flower_bud	1.36219	up	0.0001	0.000960986
orange protein	VaccDscaff29-snap-gene-99.30	Initial_vs_Flower_bud	1.36408	up	5e-05	0.000509113
geranylgeranyl diphosphate reductase, chloroplastic	VaccDscaff4-snap-gene-357.34	Initial_vs_Flower_bud	1.36562	up	0.0001	0.000960986
Phosphoribosyltransferase family protein	VaccDscaff46-processed-gene-50.28	Initial_vs_Flower_bud	1.36629	up	0.00025	0.00217815
abhydrolase domain containing 17B, depalmitoylase	VaccDscaff39-augustus-gene-24.31	Initial_vs_Flower_bud	1.37103	up	0.0001	0.000960986
Putative adipose-regulatory protein (Seipin)	VaccDscaff28-augustus-gene-142.22	Initial_vs_Flower_bud	1.37173	up	5e-05	0.000509113
CLP protease proteolytic subunit 2	VaccDscaff91-snap-gene-5.69	Initial_vs_Flower_bud	1.37257	up	5e-05	0.000509113
translocon at the outer envelope membrane of chloroplasts 159	VaccDscaff51-processed-gene-12.5	Initial_vs_Flower_bud	1.37482	up	0.00525	0.0287909
Smg-4/UPF3 family protein	VaccDscaff3-augustus-gene-47.25	Initial_vs_Flower_bud	1.37568	up	5e-05	0.000509113
Tetratricopeptide repeat (TPR)-like superfamily protein	VaccDscaff43-augustus-gene-263.27	Initial_vs_Flower_bud	1.37735	up	0.0002	0.00178731
ubiquitin family protein	VaccDscaff23-snap-gene-62.40	Initial_vs_Flower_bud	1.37822	up	0.0033	0.0196304
Protein kinase superfamily protein	VaccDscaff3-augustus-gene-201.19	Initial_vs_Flower_bud	1.3795	up	0.00985	0.0479065
Mob1/phocein family protein	VaccDscaff47-augustus-gene-11.16	Initial_vs_Flower_bud	1.38102	up	5e-05	0.000509113
CBL-interacting protein kinase 18-like	VaccDscaff1-snap-gene-247.21	Initial_vs_Flower_bud	1.38162	up	0.0007	0.00535742
phytochrome kinase substrate 1	VaccDscaff3-processed-gene-161.3	Initial_vs_Flower_bud	1.38588	up	0.00285	0.0173568
peptidase D	VaccDscaff30-snap-gene-49.45	Initial_vs_Flower_bud	1.38675	up	5e-05	0.000509113
Pyridoxal phosphate (PLP)-dependent transferases superfamily protein	VaccDscaff47-snap-gene-154.43	Initial_vs_Flower_bud	1.38845	up	0.0048	0.0267622
basic helix-loop-helix (bHLH) DNA-binding superfamily protein	VaccDscaff34-augustus-gene-120.28	Initial_vs_Flower_bud	1.38875	up	0.0001	0.000960986
serine/threonine kinase 38 like	VaccDscaff23-snap-gene-318.37	Initial_vs_Flower_bud	1.39163	up	5e-05	0.000509113
ILITYHIA	VaccDscaff34-snap-gene-241.26	Initial_vs_Flower_bud	1.39307	up	5e-05	0.000509113
NECAP endocytosis associated 1	VaccDscaff1-augustus-gene-330.29	Initial_vs_Flower_bud	1.394	up	0.0015	0.0101994
PDI-like 5-2	VaccDscaff37-snap-gene-99.30	Initial_vs_Flower_bud	1.39621	up	0.00035	0.00292308
delta tonoplast integral protein	VaccDscaff34-snap-gene-27.36	Initial_vs_Flower_bud	1.40093	up	5e-05	0.000509113
TRICHOME BIREFRINGENCE-LIKE 36	VaccDscaff29-augustus-gene-203.29	Initial_vs_Flower_bud	1.40263	up	5e-05	0.000509113
translocase of inner mitochondrial membrane 23	VaccDscaff4-processed-gene-413.2	Initial_vs_Flower_bud	1.40544	up	5e-05	0.000509113
MLP-like protein 34	VaccDscaff3-snap-gene-378.35	Initial_vs_Flower_bud	1.40878	up	0.00055	0.00434745
hypothetical protein	VaccDscaff3-augustus-gene-102.23	Initial_vs_Flower_bud	1.40989	up	0.00085	0.00632968
UPF0497 membrane protein 11	VaccDscaff38-augustus-gene-288.29	Initial_vs_Flower_bud	1.41046	up	0.00075	0.00568581
long chain base biosynthesis protein 2a-like	VaccDscaff34-augustus-gene-66.26	Initial_vs_Flower_bud	1.41169	up	5e-05	0.000509113
RNA helicase	VaccDscaff3-augustus-gene-367.18	Initial_vs_Flower_bud	1.41333	up	0.00155	0.0104737
xyloglucan endotransglucosylase/hydrolase 28	VaccDscaff28-augustus-gene-165.20	Initial_vs_Flower_bud	1.41358	up	0.0029	0.0176082
Core-2/I-branching beta-1,6-N-acetylglucosaminyltransferase family protein	VaccDscaff28-augustus-gene-200.34	Initial_vs_Flower_bud	1.4146	up	0.0024	0.0150115
putative translation initiation factor IF2	VaccDscaff29-augustus-gene-133.31	Initial_vs_Flower_bud	1.41868	up	0.0012	0.00848185
ER membrane protein complex subunit 4 L homeolog	VaccDscaff18-snap-gene-168.37	Initial_vs_Flower_bud	1.42433	up	5e-05	0.000509113
Cyclophilin-like peptidyl-prolyl cis-trans isomerase family protein	VaccDscaff23-augustus-gene-124.31	Initial_vs_Flower_bud	1.42635	up	5e-05	0.000509113
putative CCR4-Not complex subunit Mot2	VaccDscaff9-augustus-gene-342.28	Initial_vs_Flower_bud	1.42719	up	0.0036	0.0210985
K+ efflux antiporter 4	VaccDscaff29-augustus-gene-2.25	Initial_vs_Flower_bud	1.42969	up	5e-05	0.000509113
Brassinosteroid signaling positive regulator (BZR1) family protein	VaccDscaff18-augustus-gene-31.39	Initial_vs_Flower_bud	1.43035	up	0.00015	0.00138565
methyl esterase 17	VaccDscaff29-augustus-gene-102.28	Initial_vs_Flower_bud	1.43086	up	5e-05	0.000509113
serine and arginine repetitive matrix 1	VaccDscaff24-augustus-gene-77.42	Initial_vs_Flower_bud	1.43248	up	0.0011	0.00788288
Lipase/lipooxygenase, PLAT/LH2 family protein	VaccDscaff37-snap-gene-226.25	Initial_vs_Flower_bud	1.43321	up	0.00025	0.00217815
histone H3.3	VaccDscaff23-augustus-gene-353.28	Initial_vs_Flower_bud	1.43329	up	5e-05	0.000509113
Major facilitator superfamily protein	VaccDscaff39-snap-gene-282.42	Initial_vs_Flower_bud	1.4382	up	5e-05	0.000509113
magnesium transporter 9	VaccDscaff1-augustus-gene-93.23	Initial_vs_Flower_bud	1.43854	up	0.00015	0.00138565
modifier of snc1	VaccDscaff34-snap-gene-95.33	Initial_vs_Flower_bud	1.44134	up	0.0006	0.00468546
lipoamide dehydrogenase 1	VaccDscaff34-augustus-gene-181.25	Initial_vs_Flower_bud	1.44382	up	0.00365	0.0213397
WD repeat domain 13	VaccDscaff30-augustus-gene-117.26	Initial_vs_Flower_bud	1.4462	up	5e-05	0.000509113
sulfate transmembrane transporter	VaccDscaff4-processed-gene-427.6	Initial_vs_Flower_bud	1.44669	up	0.00855	0.0428607
iron regulated 2	VaccDscaff34-augustus-gene-281.21	Initial_vs_Flower_bud	1.44722	up	5e-05	0.000509113
NAD(P)-binding Rossmann-fold superfamily protein	VaccDscaff4-snap-gene-326.32	Initial_vs_Flower_bud	1.45076	up	5e-05	0.000509113
Kinase interacting (KIP1-like) family protein	VaccDscaff1-processed-gene-81.4	Initial_vs_Flower_bud	1.4535	up	5e-05	0.000509113
alpha/beta-Hydrolases superfamily protein	VaccDscaff23-augustus-gene-296.30	Initial_vs_Flower_bud	1.45376	up	0.00025	0.00217815
Tim10/DDP family zinc finger protein	VaccDscaff24-augustus-gene-76.36	Initial_vs_Flower_bud	1.4597	up	5e-05	0.000509113
histone deacetylase 2	VaccDscaff3-snap-gene-418.26	Initial_vs_Flower_bud	1.46446	up	5e-05	0.000509113
Dormancy/auxin associated family protein	VaccDscaff50-augustus-gene-27.28	Initial_vs_Flower_bud	1.46567	up	0.0003	0.00255629
signal recognition particle 72	VaccDscaff3-processed-gene-190.6	Initial_vs_Flower_bud	1.46794	up	5e-05	0.000509113
SDL5A	VaccDscaff1098-augustus-gene-0.9	Initial_vs_Flower_bud	1.47053	up	5e-05	0.000509113
solanesyl diphosphate synthase 2	VaccDscaff210-snap-gene-1.56	Initial_vs_Flower_bud	1.47144	up	5e-05	0.000509113
desumoylating isopeptidase 1	VaccDscaff47-augustus-gene-147.36	Initial_vs_Flower_bud	1.47844	up	5e-05	0.000509113
ubiquitin-specific protease 24	VaccDscaff24-snap-gene-332.36	Initial_vs_Flower_bud	1.48149	up	0.0015	0.0101994
AT hook motif DNA-binding family protein	VaccDscaff43-augustus-gene-198.27	Initial_vs_Flower_bud	1.48174	up	5e-05	0.000509113
S-formylglutathione hydrolase	VaccDscaff33-processed-gene-38.12	Initial_vs_Flower_bud	1.48203	up	0.00015	0.00138565
AGAMOUS-like 42	VaccDscaff29-snap-gene-73.37	Initial_vs_Flower_bud	1.48463	up	5e-05	0.000509113
hydrophobic protein LTI6A-like	VaccDscaff3-augustus-gene-62.24	Initial_vs_Flower_bud	1.4852	up	5e-05	0.000509113
OxaA/YidC-like membrane insertion protein	VaccDscaff3-snap-gene-188.38	Initial_vs_Flower_bud	1.4859	up	0.0005	0.00400018
vacuolar H+-pyrophosphatase 2	VaccDscaff306-processed-gene-0.24	Initial_vs_Flower_bud	1.48735	up	0.00865	0.0432732
catalytics	VaccDscaff4-augustus-gene-313.30	Initial_vs_Flower_bud	1.48788	up	0.00055	0.00434745
ACT domain-containing protein	VaccDscaff48-snap-gene-40.32	Initial_vs_Flower_bud	1.48824	up	0.00365	0.0213397
RNA-binding (RRM/RBD/RNP motifs) family protein with retrovirus zinc finger-like domain-containing protein	VaccDscaff29-augustus-gene-221.36	Initial_vs_Flower_bud	1.4889	up	5e-05	0.000509113
AFG1 like ATPase	VaccDscaff70-snap-gene-4.44	Initial_vs_Flower_bud	1.48956	up	5e-05	0.000509113
arginine biosynthesis protein ArgJ family	VaccDscaff1-snap-gene-167.39	Initial_vs_Flower_bud	1.49104	up	0.0001	0.000960986
actin-related protein 5	VaccDscaff29-augustus-gene-148.32	Initial_vs_Flower_bud	1.49389	up	0.0004	0.00328645
myristoyl-CoA:protein N-myristoyltransferase	VaccDscaff4-processed-gene-413.7	Initial_vs_Flower_bud	1.50016	up	0.0029	0.0176082
RING/U-box superfamily protein	VaccDscaff23-processed-gene-95.7	Initial_vs_Flower_bud	1.5013	up	5e-05	0.000509113
OSBP(oxysterol binding protein)-related protein 1D	VaccDscaff4-snap-gene-281.20	Initial_vs_Flower_bud	1.50228	up	5e-05	0.000509113
major facilitator superfamily domain containing 5	VaccDscaff48-augustus-gene-103.35	Initial_vs_Flower_bud	1.50357	up	0.0074	0.0380901
LA RNA-binding protein	VaccDscaff24-augustus-gene-356.22	Initial_vs_Flower_bud	1.5046	up	0.00085	0.00632968
succinate dehydrogenase 1-1	VaccDscaff42-snap-gene-90.21	Initial_vs_Flower_bud	1.51064	up	0.00025	0.00217815
HCP-like superfamily protein	VaccDscaff57-augustus-gene-1.24	Initial_vs_Flower_bud	1.51246	up	0.00165	0.0110142
rhodanese-like domain protein	VaccDscaff3-snap-gene-71.53	Initial_vs_Flower_bud	1.51655	up	5e-05	0.000509113
plant U-box 17	VaccDscaff4-processed-gene-213.15	Initial_vs_Flower_bud	1.5175	up	0.00505	0.0278692
calcineurin B-like protein 3	VaccDscaff1-snap-gene-453.38	Initial_vs_Flower_bud	1.51844	up	5e-05	0.000509113
Protein kinase superfamily protein	VaccDscaff38-processed-gene-288.7	Initial_vs_Flower_bud	1.52165	up	5e-05	0.000509113
Subtilase family protein	VaccDscaff34-augustus-gene-8.23	Initial_vs_Flower_bud	1.5288	up	5e-05	0.000509113
ubiquitin-conjugating enzyme 35	VaccDscaff1-snap-gene-411.38	Initial_vs_Flower_bud	1.52957	up	0.00145	0.00992179
DnaJ heat shock protein family (Hsp40) member B13	VaccDscaff37-augustus-gene-59.17	Initial_vs_Flower_bud	1.53561	up	0.009	0.0446415
Potassium transporter family protein	VaccDscaff18-augustus-gene-359.34	Initial_vs_Flower_bud	1.53562	up	0.007	0.0363902
3-beta hydroxysteroid dehydrogenase/isomerase family protein	VaccDscaff3-augustus-gene-286.16	Initial_vs_Flower_bud	1.53768	up	5e-05	0.000509113
nucleolin 2-like	VaccDscaff33-snap-gene-182.32	Initial_vs_Flower_bud	1.53982	up	0.0033	0.0196304
HXXXD-type acyl-transferase family protein	VaccDscaff48-augustus-gene-19.19	Initial_vs_Flower_bud	1.54239	up	0.00025	0.00217815
sodium/calcium exchanger NCL2-like	VaccDscaff1278-snap-gene-0.5	Initial_vs_Flower_bud	1.54284	up	0.00045	0.00364749
basic helix-loop-helix (bHLH) DNA-binding superfamily protein	VaccDscaff28-processed-gene-141.1	Initial_vs_Flower_bud	1.54421	up	5e-05	0.000509113
Cystathionine beta-synthase (CBS) family protein	VaccDscaff4-augustus-gene-239.26	Initial_vs_Flower_bud	1.54532	up	0.00235	0.0147509
Glycosyltransferase family 29 (sialyltransferase) family protein	VaccDscaff4-augustus-gene-390.21	Initial_vs_Flower_bud	1.5481	up	0.00275	0.0168337
testis expressed 10	VaccDscaff33-snap-gene-72.34	Initial_vs_Flower_bud	1.55196	up	0.0051	0.0280997
A kinase (PRKA) anchor protein 17B	VaccDscaff23-snap-gene-298.27	Initial_vs_Flower_bud	1.55273	up	0.0052	0.0285584
Galactosyltransferase family protein	VaccDscaff28-augustus-gene-1.26	Initial_vs_Flower_bud	1.5549	up	5e-05	0.000509113
Cyclophilin-like peptidyl-prolyl cis-trans isomerase family protein	VaccDscaff28-snap-gene-92.28	Initial_vs_Flower_bud	1.56062	up	0.00665	0.0348852
glycosyltransferase family protein 47	VaccDscaff29-augustus-gene-193.17	Initial_vs_Flower_bud	1.56116	up	5e-05	0.000509113
Myb oncogene-like	VaccDscaff32-augustus-gene-329.37	Initial_vs_Flower_bud	1.5636	up	5e-05	0.000509113
male-gametophyte specific 1	VaccDscaff18-augustus-gene-81.17	Initial_vs_Flower_bud	1.56467	up	5e-05	0.000509113
glyoxalase 2-4	VaccDscaff4-augustus-gene-145.17	Initial_vs_Flower_bud	1.56523	up	0.0009	0.00664913
Clathrin adaptor complexes medium subunit family protein	VaccDscaff3-augustus-gene-71.38	Initial_vs_Flower_bud	1.56569	up	5e-05	0.000509113
Homeobox-leucine zipper protein family	VaccDscaff3-augustus-gene-163.13	Initial_vs_Flower_bud	1.56624	up	5e-05	0.000509113
copper-exporting ATPase / responsive-to-antagonist 1 / copper-transporting ATPase (RAN1)	VaccDscaff28-augustus-gene-125.11	Initial_vs_Flower_bud	1.56735	up	5e-05	0.000509113
Nucleotide-sugar transporter family protein	VaccDscaff1-snap-gene-287.31	Initial_vs_Flower_bud	1.57031	up	0.0032	0.0191338
Protein with RING/U-box and TRAF-like domain	VaccDscaff48-augustus-gene-101.33	Initial_vs_Flower_bud	1.57046	up	0.0001	0.000960986
EBP1	VaccDscaff34-snap-gene-275.44	Initial_vs_Flower_bud	1.57162	up	0.00725	0.0374455
adenosine-5'-phosphosulfate (APS) kinase 3	VaccDscaff29-augustus-gene-348.58	Initial_vs_Flower_bud	1.5719	up	0.00895	0.0444405
glucan endo-1,3-beta-glucosidase-like	VaccDscaff47-augustus-gene-82.17	Initial_vs_Flower_bud	1.57877	up	5e-05	0.000509113
NADH dehydrogenase [ubiquinone] iron-sulfur protein 1, mitochondrial-like	VaccDscaff42-augustus-gene-37.23	Initial_vs_Flower_bud	1.58199	up	0.0073	0.0376586
magnesium transporter, putative (DUF803)	VaccDscaff42-snap-gene-16.41	Initial_vs_Flower_bud	1.58378	up	5e-05	0.000509113
Zinc finger (C3HC4-type RING finger) family protein	VaccDscaff48-augustus-gene-56.34	Initial_vs_Flower_bud	1.58435	up	0.0005	0.00400018
putative elongin-A Pof4	VaccDscaff6-augustus-gene-161.19	Initial_vs_Flower_bud	1.58633	up	0.00695	0.0361801
BolA-like family protein	VaccDscaff29-augustus-gene-12.30	Initial_vs_Flower_bud	1.58776	up	5e-05	0.000509113
ZIP metal ion transporter family	VaccDscaff24-augustus-gene-68.26	Initial_vs_Flower_bud	1.58889	up	5e-05	0.000509113
potassium transporter 1	VaccDscaff47-augustus-gene-112.19	Initial_vs_Flower_bud	1.59138	up	0.0043	0.024449
RING/U-box superfamily protein	VaccDscaff1-augustus-gene-210.29	Initial_vs_Flower_bud	1.59285	up	0.0061	0.0324943
NAC domain containing protein 87	VaccDscaff1-processed-gene-315.12	Initial_vs_Flower_bud	1.59381	up	0.00765	0.0391281
abhydrolase domain containing 17B	VaccDscaff31-augustus-gene-13.34	Initial_vs_Flower_bud	1.59605	up	0.00015	0.00138565
Pectin lyase-like superfamily protein	VaccDscaff28-processed-gene-298.18	Initial_vs_Flower_bud	1.5992	up	0.0039	0.0225382
anthranilate synthase beta subunit 1	VaccDscaff28-snap-gene-165.22	Initial_vs_Flower_bud	1.59946	up	0.01025	0.0495004
LIGHT-DEPENDENT SHORT HYPOCOTYLS-like protein (DUF640)	VaccDscaff47-processed-gene-158.2	Initial_vs_Flower_bud	1.60076	up	5e-05	0.000509113
Thiamine pyrophosphate dependent pyruvate decarboxylase family protein	VaccDscaff34-snap-gene-276.37	Initial_vs_Flower_bud	1.60107	up	0.0073	0.0376586
Probable splicing factor, arginine/serine-rich 4	VaccDscaff3-processed-gene-372.3	Initial_vs_Flower_bud	1.60394	up	5e-05	0.000509113
copper/zinc superoxide dismutase 2	VaccDscaff15-augustus-gene-278.29	Initial_vs_Flower_bud	1.6045	up	0.00155	0.0104737
galacturonosyltransferase 4	VaccDscaff4-augustus-gene-153.24	Initial_vs_Flower_bud	1.60451	up	0.00125	0.0087766
GATA transcription factor 26	VaccDscaff105-augustus-gene-4.47	Initial_vs_Flower_bud	1.60486	up	5e-05	0.000509113
formin homology 1	VaccDscaff47-augustus-gene-130.26	Initial_vs_Flower_bud	1.60559	up	5e-05	0.000509113
ATP-dependent caseinolytic (Clp) protease/crotonase family protein	VaccDscaff1-augustus-gene-320.32	Initial_vs_Flower_bud	1.6066	up	5e-05	0.000509113
probable membrane-associated 30 kDa protein, chloroplastic	VaccDscaff17-snap-gene-201.31	Initial_vs_Flower_bud	1.60666	up	0.0012	0.00848185
leo1-like family protein	VaccDscaff4-augustus-gene-351.27	Initial_vs_Flower_bud	1.60738	up	0.0011	0.00788288
GATA transcription factor 11	VaccDscaff28-augustus-gene-291.23	Initial_vs_Flower_bud	1.60898	up	0.01015	0.0490958
histone deacetylase 15	VaccDscaff42-snap-gene-134.36	Initial_vs_Flower_bud	1.61138	up	5e-05	0.000509113
signal recognition particle receptor ('docking protein')	VaccDscaff39-processed-gene-48.12	Initial_vs_Flower_bud	1.61332	up	5e-05	0.000509113
PDI-like 1-3	VaccDscaff29-snap-gene-169.31	Initial_vs_Flower_bud	1.61727	up	5e-05	0.000509113
allantoinase	VaccDscaff4-snap-gene-239.31	Initial_vs_Flower_bud	1.61967	up	0.00135	0.00935942
multidrug resistance-associated protein 9	VaccDscaff22-snap-gene-61.29	Initial_vs_Flower_bud	1.62193	up	5e-05	0.000509113
alkaline/neutral invertase	VaccDscaff47-snap-gene-55.23	Initial_vs_Flower_bud	1.62214	up	5e-05	0.000509113
photosystem II subunit Q-2	VaccDscaff4-augustus-gene-176.15	Initial_vs_Flower_bud	1.62339	up	0.00035	0.00292308
UBX domain protein 1	VaccDscaff36-augustus-gene-228.45	Initial_vs_Flower_bud	1.62417	up	0.00075	0.00568581
long-chain acyl-CoA synthetase 7	VaccDscaff1-augustus-gene-70.30	Initial_vs_Flower_bud	1.62862	up	5e-05	0.000509113
trichome birefringence-like protein (DUF828)	VaccDscaff29-augustus-gene-345.28	Initial_vs_Flower_bud	1.63332	up	5e-05	0.000509113
myosin-binding protein (Protein of unknown function, DUF593)	VaccDscaff28-processed-gene-189.6	Initial_vs_Flower_bud	1.63405	up	0.00195	0.0126184
HECT and RLD domain containing E3 ubiquitin protein ligase family member 1	VaccDscaff30-snap-gene-282.27	Initial_vs_Flower_bud	1.63465	up	0.00705	0.0366072
Ca2+ activated outward rectifying K+ channel 6	VaccDscaff954-snap-gene-0.7	Initial_vs_Flower_bud	1.63505	up	5e-05	0.000509113
6-phosphogluconate dehydrogenase family protein	VaccDscaff45-augustus-gene-88.29	Initial_vs_Flower_bud	1.63532	up	0.00495	0.0274362
Ribosomal protein L18e/L15 superfamily protein	VaccDscaff4-processed-gene-374.26	Initial_vs_Flower_bud	1.63844	up	0.0022	0.0139552
zinc finger (CCCH-type) family protein	VaccDscaff48-snap-gene-67.40	Initial_vs_Flower_bud	1.63845	up	5e-05	0.000509113
mesoderm induction early response protein	VaccDscaff41-augustus-gene-171.22	Initial_vs_Flower_bud	1.6399	up	0.0052	0.0285584
serine carboxypeptidase 3-like	VaccDscaff15-snap-gene-280.30	Initial_vs_Flower_bud	1.64038	up	0.0002	0.00178731
glutathione peroxidase 4	VaccDscaff47-augustus-gene-177.33	Initial_vs_Flower_bud	1.6441	up	0.0001	0.000960986
C2H2 and C2HC zinc fingers superfamily protein	VaccDscaff3-snap-gene-7.39	Initial_vs_Flower_bud	1.65462	up	5e-05	0.000509113
armadillo repeat kinesin 3	VaccDscaff46-augustus-gene-14.18	Initial_vs_Flower_bud	1.65615	up	5e-05	0.000509113
COP1-interacting protein 8	VaccDscaff23-processed-gene-344.9	Initial_vs_Flower_bud	1.65683	up	0.00555	0.0300974
cytochrome b559 alpha subunit	VaccDscaff35-processed-gene-45.31	Initial_vs_Flower_bud	1.6573	up	0.00665	0.0348852
serine/arginine repetitive matrix 2	VaccDscaff3-snap-gene-278.19	Initial_vs_Flower_bud	1.6593	up	5e-05	0.000509113
nitrate transporter 1.7	VaccDscaff3-snap-gene-165.27	Initial_vs_Flower_bud	1.65949	up	0.00045	0.00364749
CLP protease P4	VaccDscaff3-augustus-gene-402.34	Initial_vs_Flower_bud	1.66355	up	0.00225	0.0142218
atypical CYS HIS rich thioredoxin 5	VaccDscaff4-augustus-gene-356.23	Initial_vs_Flower_bud	1.66857	up	5e-05	0.000509113
Protein phosphatase 2C family protein	VaccDscaff3-processed-gene-77.11	Initial_vs_Flower_bud	1.66985	up	0.00025	0.00217815
aldehyde dehydrogenase 3F1	VaccDscaff42-augustus-gene-17.42	Initial_vs_Flower_bud	1.67069	up	5e-05	0.000509113
2-oxoglutarate (2OG) and Fe(II)-dependent oxygenase superfamily protein	VaccDscaff24-augustus-gene-96.25	Initial_vs_Flower_bud	1.67146	up	5e-05	0.000509113
anaphase promoting complex 10	VaccDscaff42-snap-gene-94.27	Initial_vs_Flower_bud	1.67165	up	0.006	0.0321144
CTP synthase URA7	VaccDscaff24-augustus-gene-171.17	Initial_vs_Flower_bud	1.67227	up	0.0008	0.00600935
myb domain protein 4	VaccDscaff28-augustus-gene-197.19	Initial_vs_Flower_bud	1.67663	up	0.0002	0.00178731
DDT domain superfamily	VaccDscaff4-augustus-gene-364.31	Initial_vs_Flower_bud	1.67732	up	5e-05	0.000509113
ACT domain-containing protein	VaccDscaff29-snap-gene-154.17	Initial_vs_Flower_bud	1.68006	up	0.00065	0.00502564
RING-H2 finger A1B	VaccDscaff1210-processed-gene-0.0	Initial_vs_Flower_bud	1.68009	up	0.0009	0.00664913
CREC_EMENI Catabolite repression protein creC	VaccDscaff34-processed-gene-303.2	Initial_vs_Flower_bud	1.68419	up	0.00605	0.0323192
Calcineurin-like metallo-phosphoesterase superfamily protein	VaccDscaff1-snap-gene-145.17	Initial_vs_Flower_bud	1.68518	up	0.0004	0.00328645
gamma tonoplast intrinsic protein	VaccDscaff47-augustus-gene-66.24	Initial_vs_Flower_bud	1.68544	up	0.0095	0.0465232
uvrB/uvrC motif-containing protein	VaccDscaff14-snap-gene-248.28	Initial_vs_Flower_bud	1.68709	up	5e-05	0.000509113
transmembrane kinase 1	VaccDscaff28-augustus-gene-168.16	Initial_vs_Flower_bud	1.68919	up	0.00095	0.00696513
serine/threonine-protein phosphatase PP1 isozyme 2	VaccDscaff15-augustus-gene-328.51	Initial_vs_Flower_bud	1.68925	up	0.00195	0.0126184
GRAM domain family protein	VaccDscaff39-augustus-gene-73.18	Initial_vs_Flower_bud	1.68991	up	0.0038	0.0220507
Nucleotide-sugar transporter family protein	VaccDscaff48-augustus-gene-72.41	Initial_vs_Flower_bud	1.69197	up	0.00585	0.0314445
epsin N-terminal homology (ENTH) domain-containing protein / clathrin assembly protein-like protein	VaccDscaff28-processed-gene-85.3	Initial_vs_Flower_bud	1.69201	up	0.0052	0.0285584
homeobox protein knotted-1-like 3	VaccDscaff28-snap-gene-77.25	Initial_vs_Flower_bud	1.69337	up	0.0013	0.0090707
2-aminoethanethiol dioxygenase, putative (DUF1637)	VaccDscaff39-snap-gene-237.30	Initial_vs_Flower_bud	1.69419	up	0.00575	0.0309915
NAD(P)-binding Rossmann-fold superfamily protein	VaccDscaff24-augustus-gene-151.23	Initial_vs_Flower_bud	1.69556	up	0.0004	0.00328645
histone acetyltransferase of the GNAT family 1	VaccDscaff47-augustus-gene-169.34	Initial_vs_Flower_bud	1.69636	up	0.00025	0.00217815
nucleotide repair protein	VaccDscaff34-augustus-gene-161.20	Initial_vs_Flower_bud	1.69821	up	5e-05	0.000509113
CBL-interacting protein kinase 21	VaccDscaff70-augustus-gene-1.30	Initial_vs_Flower_bud	1.69855	up	0.00155	0.0104737
pyridoxin (pyrodoxamine) 5'-phosphate oxidase	VaccDscaff23-augustus-gene-265.33	Initial_vs_Flower_bud	1.69892	up	0.00045	0.00364749
nuclear factor Y, subunit C1	VaccDscaff4-processed-gene-384.19	Initial_vs_Flower_bud	1.69955	up	5e-05	0.000509113
galacturonosyltransferase-like 7	VaccDscaff47-processed-gene-191.9	Initial_vs_Flower_bud	1.70273	up	0.00905	0.0447893
SELT-like protein precursor	VaccDscaff34-snap-gene-274.21	Initial_vs_Flower_bud	1.70426	up	0.00665	0.0348852
checkpoint with forkhead and ring finger domains	VaccDscaff19-augustus-gene-94.32	Initial_vs_Flower_bud	1.70607	up	0.0001	0.000960986
serine carboxypeptidase-like 18	VaccDscaff34-augustus-gene-149.16	Initial_vs_Flower_bud	1.70782	up	0.00015	0.00138565
probable inactive heme oxygenase 2, chloroplastic	VaccDscaff23-snap-gene-323.32	Initial_vs_Flower_bud	1.71087	up	5e-05	0.000509113
putative DNA-directed RNA polymerase I complex subunit Rpa49	VaccDscaff34-processed-gene-14.3	Initial_vs_Flower_bud	1.71153	up	5e-05	0.000509113
MAP kinase kinase 7	VaccDscaff3-processed-gene-42.8	Initial_vs_Flower_bud	1.71293	up	0.00795	0.0403715
ypt homolog 2	VaccDscaff48-augustus-gene-87.26	Initial_vs_Flower_bud	1.71363	up	0.00015	0.00138565
hydroxyproline-rich glycoprotein family protein	VaccDscaff93-augustus-gene-3.42	Initial_vs_Flower_bud	1.71406	up	0.00065	0.00502564
RAB GTPase homolog A3	VaccDscaff22-augustus-gene-2.23	Initial_vs_Flower_bud	1.71455	up	0.0034	0.0201079
putative cytochrome c oxidase assembly protein Cmc1	VaccDscaff45-snap-gene-103.37	Initial_vs_Flower_bud	1.71463	up	5e-05	0.000509113
allene oxide cyclase, chloroplastic-like	VaccDscaff18-augustus-gene-301.31	Initial_vs_Flower_bud	1.71883	up	0.00765	0.0391281
phosphoglucose isomerase 1	VaccDscaff23-augustus-gene-273.27	Initial_vs_Flower_bud	1.72094	up	0.00215	0.0136909
casein kinase I	VaccDscaff4-processed-gene-82.1	Initial_vs_Flower_bud	1.72384	up	0.0078	0.0397474
Uncharacterized protein family (UPF0041)	VaccDscaff48-snap-gene-25.26	Initial_vs_Flower_bud	1.72535	up	0.0044	0.0249164
Rhodanese/Cell cycle control phosphatase superfamily protein	VaccDscaff29-augustus-gene-221.28	Initial_vs_Flower_bud	1.72639	up	0.00565	0.0305475
cactus-binding carboxy-terminal, cactin	VaccDscaff29-augustus-gene-228.28	Initial_vs_Flower_bud	1.73171	up	5e-05	0.000509113
PapD-like superfamily protein	VaccDscaff4-snap-gene-183.24	Initial_vs_Flower_bud	1.73257	up	5e-05	0.000509113
SPIRAL1-like1	VaccDscaff48-augustus-gene-16.27	Initial_vs_Flower_bud	1.73361	up	0.0001	0.000960986
S-adenosyl-L-methionine-dependent methyltransferases superfamily protein	VaccDscaff3-augustus-gene-311.23	Initial_vs_Flower_bud	1.73382	up	0.00225	0.0142218
Uncharacterized protein family SERF	VaccDscaff23-augustus-gene-302.35	Initial_vs_Flower_bud	1.7347	up	0.0074	0.0380901
poltergeist like 1	VaccDscaff3-augustus-gene-371.12	Initial_vs_Flower_bud	1.73552	up	0.0001	0.000960986
plasmodesmata-located protein 6	VaccDscaff28-augustus-gene-183.20	Initial_vs_Flower_bud	1.73555	up	5e-05	0.000509113
type I HSP40 co-chaperone HLJ1	VaccDscaff23-processed-gene-276.7	Initial_vs_Flower_bud	1.73694	up	0.0088	0.0438342
Nucleotide-diphospho-sugar transferases superfamily protein	VaccDscaff29-snap-gene-233.30	Initial_vs_Flower_bud	1.73867	up	0.00135	0.00935942
homeobox-1	VaccDscaff4-augustus-gene-232.25	Initial_vs_Flower_bud	1.74236	up	5e-05	0.000509113
pfkB-like carbohydrate kinase family protein	VaccDscaff3-augustus-gene-277.21	Initial_vs_Flower_bud	1.74372	up	5e-05	0.000509113
myosin 1	VaccDscaff26-snap-gene-8.22	Initial_vs_Flower_bud	1.74572	up	0.0024	0.0150115
Chlorophyll A-B binding family protein	VaccDscaff46-augustus-gene-43.21	Initial_vs_Flower_bud	1.74713	up	5e-05	0.000509113
P-loop containing nucleoside triphosphate hydrolases superfamily protein	VaccDscaff4-augustus-gene-128.22	Initial_vs_Flower_bud	1.75317	up	5e-05	0.000509113
DEA(D/H)-box RNA helicase family protein	VaccDscaff34-snap-gene-19.34	Initial_vs_Flower_bud	1.75493	up	0.00015	0.00138565
calcineurin B-like protein 9	VaccDscaff2-augustus-gene-152.17	Initial_vs_Flower_bud	1.7554	up	0.00385	0.0222963
N2,N2-dimethylguanosine tRNA methyltransferase	VaccDscaff30-snap-gene-319.23	Initial_vs_Flower_bud	1.75938	up	0.00105	0.00757987
MAC/Perforin domain-containing protein	VaccDscaff28-snap-gene-144.31	Initial_vs_Flower_bud	1.76358	up	0.001	0.0072762
beta-galactosidase 17	VaccDscaff4-snap-gene-415.36	Initial_vs_Flower_bud	1.76399	up	0.00225	0.0142218
DNA polymerase alpha 2, accessory subunit	VaccDscaff35-augustus-gene-176.34	Initial_vs_Flower_bud	1.7669	up	5e-05	0.000509113
probable E3 ubiquitin-protein ligase XBOS32	VaccDscaff39-augustus-gene-8.29	Initial_vs_Flower_bud	1.7679	up	5e-05	0.000509113
SDE2 telomere maintenance homolog (S. pombe) S homeolog	VaccDscaff686-processed-gene-0.8	Initial_vs_Flower_bud	1.7683	up	5e-05	0.000509113
Calcium-binding EF-hand family protein	VaccDscaff29-processed-gene-313.7	Initial_vs_Flower_bud	1.77125	up	5e-05	0.000509113
ENTH/VHS family protein	VaccDscaff469-snap-gene-0.26	Initial_vs_Flower_bud	1.77176	up	5e-05	0.000509113
Phototropic-responsive NPH3 family protein	VaccDscaff42-snap-gene-77.25	Initial_vs_Flower_bud	1.77674	up	5e-05	0.000509113
glycosyltransferase family 92 protein RCOM_0530710	VaccDscaff3-processed-gene-168.7	Initial_vs_Flower_bud	1.77785	up	5e-05	0.000509113
Concanavalin A-like lectin protein kinase family protein	VaccDscaff3-snap-gene-101.26	Initial_vs_Flower_bud	1.77971	up	5e-05	0.000509113
regulatory particle AAA-ATPase 2A	VaccDscaff47-augustus-gene-150.19	Initial_vs_Flower_bud	1.78171	up	0.0003	0.00255629
BTB-POZ and MATH domain 2	VaccDscaff47-augustus-gene-178.36	Initial_vs_Flower_bud	1.78631	up	5e-05	0.000509113
allene oxide synthase	VaccDscaff23-augustus-gene-332.35	Initial_vs_Flower_bud	1.78918	up	0.01	0.0484994
50S ribosomal protein L27	VaccDscaff208-augustus-gene-0.34	Initial_vs_Flower_bud	1.79479	up	5e-05	0.000509113
cell wall / vacuolar inhibitor of fructosidase 2	VaccDscaff39-processed-gene-130.9	Initial_vs_Flower_bud	1.79519	up	0.01	0.0484994
Homeobox-leucine zipper protein family	VaccDscaff32-augustus-gene-265.14	Initial_vs_Flower_bud	1.79736	up	0.0005	0.00400018
recA DNA recombination family protein	VaccDscaff90-augustus-gene-1.18	Initial_vs_Flower_bud	1.8011	up	5e-05	0.000509113
galacturonosyltransferase 7	VaccDscaff34-augustus-gene-321.37	Initial_vs_Flower_bud	1.80129	up	5e-05	0.000509113
poltergeist like 4	VaccDscaff1-augustus-gene-162.24	Initial_vs_Flower_bud	1.80159	up	5e-05	0.000509113
multidrug resistance-associated protein 4	VaccDscaff51-augustus-gene-12.25	Initial_vs_Flower_bud	1.8042	up	0.00065	0.00502564
SNARE-like superfamily protein	VaccDscaff48-processed-gene-101.4	Initial_vs_Flower_bud	1.80502	up	5e-05	0.000509113
coatomer subunit zeta-2-like	VaccDscaff34-snap-gene-15.28	Initial_vs_Flower_bud	1.8067	up	0.0061	0.0324943
poly(A) binding protein 7	VaccDscaff29-augustus-gene-228.29	Initial_vs_Flower_bud	1.80705	up	0.00405	0.023265
FRIGIDA like 1	VaccDscaff93-augustus-gene-5.48	Initial_vs_Flower_bud	1.80898	up	0.0027	0.0165756
C-terminal domain phosphatase-like 3	VaccDscaff4-augustus-gene-254.27	Initial_vs_Flower_bud	1.80928	up	5e-05	0.000509113
plastid developmental protein DAG	VaccDscaff133-snap-gene-1.33	Initial_vs_Flower_bud	1.81449	up	5e-05	0.000509113
expansin-like A1	VaccDscaff42-augustus-gene-212.24	Initial_vs_Flower_bud	1.81627	up	0.00065	0.00502564
UDP-N-acetylglucosamine (UAA) transporter family	VaccDscaff29-augustus-gene-297.28	Initial_vs_Flower_bud	1.81641	up	0.00035	0.00292308
Leucine-rich repeat receptor-like protein kinase family protein	VaccDscaff3-augustus-gene-330.22	Initial_vs_Flower_bud	1.81839	up	5e-05	0.000509113
Mitochondrial import inner membrane translocase subunit Tim17/Tim22/Tim23 family protein	VaccDscaff93-augustus-gene-5.53	Initial_vs_Flower_bud	1.81987	up	0.00375	0.0218303
angio associated migratory cell protein	VaccDscaff23-augustus-gene-227.22	Initial_vs_Flower_bud	1.82077	up	5e-05	0.000509113
Cyclin A2;4	VaccDscaff34-augustus-gene-35.25	Initial_vs_Flower_bud	1.82155	up	5e-05	0.000509113
Pyridoxal phosphate (PLP)-dependent transferases superfamily protein	VaccDscaff30-augustus-gene-325.31	Initial_vs_Flower_bud	1.82255	up	5e-05	0.000509113
DnaJ P58IPK-like protein	VaccDscaff34-augustus-gene-304.22	Initial_vs_Flower_bud	1.82294	up	5e-05	0.000509113
beta-hexosaminidase 2	VaccDscaff385-augustus-gene-0.21	Initial_vs_Flower_bud	1.82324	up	0.00015	0.00138565
VPS41	VaccDscaff24-snap-gene-108.30	Initial_vs_Flower_bud	1.82351	up	0.0016	0.0107463
Clathrin adaptor complex small chain family protein	VaccDscaff208-snap-gene-0.43	Initial_vs_Flower_bud	1.82379	up	0.00125	0.0087766
golgi nucleotide sugar transporter 4	VaccDscaff23-processed-gene-22.18	Initial_vs_Flower_bud	1.82503	up	0.0014	0.00964257
Cytidine/deoxycytidylate deaminase family protein	VaccDscaff45-augustus-gene-152.26	Initial_vs_Flower_bud	1.82631	up	0.0068	0.0355387
sugar transporter protein 7	VaccDscaff60-snap-gene-9.64	Initial_vs_Flower_bud	1.82686	up	0.00045	0.00364749
RNA-binding (RRM/RBD/RNP motifs) family protein	VaccDscaff24-augustus-gene-257.36	Initial_vs_Flower_bud	1.8279	up	0.0088	0.0438342
spastin S homeolog	VaccDscaff707-augustus-gene-0.15	Initial_vs_Flower_bud	1.828	up	5e-05	0.000509113
methionine aminopeptidase 2B	VaccDscaff335-snap-gene-0.25	Initial_vs_Flower_bud	1.82834	up	5e-05	0.000509113
SEC11 homolog A, signal peptidase complex subunit	VaccDscaff23-augustus-gene-30.35	Initial_vs_Flower_bud	1.829	up	5e-05	0.000509113
glycerate dehydrogenase-like	VaccDscaff42-augustus-gene-205.29	Initial_vs_Flower_bud	1.83213	up	0.0095	0.0465232
Protein kinase superfamily protein	VaccDscaff24-augustus-gene-130.35	Initial_vs_Flower_bud	1.83385	up	0.0049	0.0272038
kinesin light chain 3	VaccDscaff13-snap-gene-23.34	Initial_vs_Flower_bud	1.83743	up	5e-05	0.000509113
ATP synthase delta chain, chloroplastic	VaccDscaff18-processed-gene-84.0	Initial_vs_Flower_bud	1.83888	up	0.00185	0.0120815
Endosomal targeting BRO1-like domain-containing protein	VaccDscaff28-augustus-gene-206.37	Initial_vs_Flower_bud	1.83977	up	0.0009	0.00664913
CASC3/Barentsz eIF4AIII binding protein	VaccDscaff4-snap-gene-426.45	Initial_vs_Flower_bud	1.84388	up	5e-05	0.000509113
magnesium-dependent phosphatase 1	VaccDscaff34-augustus-gene-237.34	Initial_vs_Flower_bud	1.8493	up	0.0034	0.0201079
Rab escort protein	VaccDscaff42-snap-gene-27.45	Initial_vs_Flower_bud	1.84946	up	0.0056	0.0303223
zinc finger WD40 repeat protein 1	VaccDscaff29-augustus-gene-71.27	Initial_vs_Flower_bud	1.85067	up	0.0057	0.03077
Presenilin-2	VaccDscaff42-processed-gene-150.10	Initial_vs_Flower_bud	1.855	up	5e-05	0.000509113
NADH-ubiquinone oxidoreductase-like protein	VaccDscaff24-snap-gene-182.36	Initial_vs_Flower_bud	1.85729	up	0.0024	0.0150115
related to AP2 2	VaccDscaff17-augustus-gene-368.24	Initial_vs_Flower_bud	1.85733	up	0.0001	0.000960986
golgin Putative 2	VaccDscaff4-augustus-gene-329.24	Initial_vs_Flower_bud	1.85896	up	5e-05	0.000509113
YAK1-like protein 1	VaccDscaff29-augustus-gene-12.23	Initial_vs_Flower_bud	1.86129	up	0.00015	0.00138565
probable aldo-keto reductase 2	VaccDscaff515-processed-gene-0.5	Initial_vs_Flower_bud	1.86218	up	0.00395	0.0227778
Phototropic-responsive NPH3 family protein	VaccDscaff47-augustus-gene-124.39	Initial_vs_Flower_bud	1.86424	up	0.0027	0.0165756
F-box/RNI-like superfamily protein	VaccDscaff402-snap-gene-0.15	Initial_vs_Flower_bud	1.86433	up	0.0007	0.00535742
Granulin repeat cysteine protease family protein	VaccDscaff41-processed-gene-41.22	Initial_vs_Flower_bud	1.86898	up	5e-05	0.000509113
plastid division2	VaccDscaff3-augustus-gene-3.39	Initial_vs_Flower_bud	1.87024	up	5e-05	0.000509113
anoctamin-like protein	VaccDscaff34-augustus-gene-24.30	Initial_vs_Flower_bud	1.87204	up	5e-05	0.000509113
calnexin 1	VaccDscaff4-snap-gene-393.48	Initial_vs_Flower_bud	1.87538	up	0.0044	0.0249164
cytochrome c oxidase assembly factor 6 homolog (S. cerevisiae)	VaccDscaff74-snap-gene-0.19	Initial_vs_Flower_bud	1.87564	up	0.00015	0.00138565
Actin binding Calponin homology (CH) domain-containing protein	VaccDscaff5-processed-gene-417.11	Initial_vs_Flower_bud	1.87929	up	0.00265	0.0163189
PDS5 cohesin associated factor B	VaccDscaff82-snap-gene-0.26	Initial_vs_Flower_bud	1.87956	up	5e-05	0.000509113
leucine-rich repeat/extensin 2	VaccDscaff23-processed-gene-64.0	Initial_vs_Flower_bud	1.88378	up	5e-05	0.000509113
with no lysine (K) kinase 5	VaccDscaff45-augustus-gene-60.17	Initial_vs_Flower_bud	1.8858	up	0.00555	0.0300974
TBP-associated factor 13	VaccDscaff47-augustus-gene-192.26	Initial_vs_Flower_bud	1.88602	up	0.00435	0.0246889
basic helix-loop-helix (bHLH) DNA-binding superfamily protein	VaccDscaff47-augustus-gene-169.33	Initial_vs_Flower_bud	1.88675	up	0.0101	0.0488957
F-box/FBD/LRR protein	VaccDscaff39-augustus-gene-267.22	Initial_vs_Flower_bud	1.88703	up	5e-05	0.000509113
Leucine-rich repeat transmembrane protein kinase	VaccDscaff751-processed-gene-0.7	Initial_vs_Flower_bud	1.88944	up	0.00245	0.0152794
P-loop containing nucleoside triphosphate hydrolases superfamily protein	VaccDscaff34-snap-gene-229.48	Initial_vs_Flower_bud	1.89176	up	5e-05	0.000509113
cullin 3B	VaccDscaff3-snap-gene-162.36	Initial_vs_Flower_bud	1.89323	up	0.00015	0.00138565
Nucleotide-diphospho-sugar transferases superfamily protein	VaccDscaff28-augustus-gene-107.20	Initial_vs_Flower_bud	1.89501	up	0.0001	0.000960986
nitrate transmembrane transporter	VaccDscaff4-augustus-gene-375.36	Initial_vs_Flower_bud	1.89949	up	0.0001	0.000960986
Rad23 UV excision repair protein family	VaccDscaff28-augustus-gene-222.19	Initial_vs_Flower_bud	1.90038	up	5e-05	0.000509113
Nucleoside transporter family protein	VaccDscaff60-augustus-gene-3.30	Initial_vs_Flower_bud	1.90357	up	0.00865	0.0432732
BRCA1 associated protein	VaccDscaff60-augustus-gene-5.31	Initial_vs_Flower_bud	1.90461	up	5e-05	0.000509113
probable protein phosphatase 2C 27	VaccDscaff39-augustus-gene-29.24	Initial_vs_Flower_bud	1.90503	up	0.0092	0.0453884
cyclin-dependent kinase G-2-like	VaccDscaff3-snap-gene-192.36	Initial_vs_Flower_bud	1.90542	up	5e-05	0.000509113
lipoamide dehydrogenase 2	VaccDscaff5-augustus-gene-7.27	Initial_vs_Flower_bud	1.90611	up	0.0013	0.0090707
EAP30/Vps36 family protein	VaccDscaff1-augustus-gene-437.23	Initial_vs_Flower_bud	1.90717	up	0.0022	0.0139552
P-loop containing nucleoside triphosphate hydrolases superfamily protein	VaccDscaff1-augustus-gene-31.30	Initial_vs_Flower_bud	1.90734	up	0.00015	0.00138565
ycf39	VaccDscaff14-augustus-gene-390.39	Initial_vs_Flower_bud	1.91016	up	0.0007	0.00535742
serine hydroxymethyltransferase 7	VaccDscaff3-augustus-gene-41.35	Initial_vs_Flower_bud	1.91115	up	0.00715	0.0370195
NOP58 ribonucleoprotein	VaccDscaff40-augustus-gene-25.28	Initial_vs_Flower_bud	1.91254	up	0.00055	0.00434745
A20/AN1-like zinc finger family protein	VaccDscaff29-processed-gene-201.8	Initial_vs_Flower_bud	1.91694	up	5e-05	0.000509113
UDP-XYL synthase 6	VaccDscaff28-processed-gene-301.31	Initial_vs_Flower_bud	1.9179	up	0.00085	0.00632968
GroES-like zinc-binding dehydrogenase family protein	VaccDscaff4-augustus-gene-327.28	Initial_vs_Flower_bud	1.92387	up	5e-05	0.000509113
myosin 2	VaccDscaff47-augustus-gene-152.22	Initial_vs_Flower_bud	1.92465	up	0.00025	0.00217815
ROP interactive partner 2	VaccDscaff1-processed-gene-398.4	Initial_vs_Flower_bud	1.92888	up	0.0102	0.0492971
4-coumarate--CoA ligase 4	VaccDscaff48-augustus-gene-108.40	Initial_vs_Flower_bud	1.93023	up	5e-05	0.000509113
protein argonaute 1A-like	VaccDscaff4-snap-gene-325.27	Initial_vs_Flower_bud	1.93073	up	0.00015	0.00138565
Class II aminoacyl-tRNA and biotin synthetases superfamily protein	VaccDscaff29-augustus-gene-222.14	Initial_vs_Flower_bud	1.93114	up	0.0017	0.0112779
elicitor-responsive protein 1-like	VaccDscaff29-augustus-gene-150.22	Initial_vs_Flower_bud	1.935	up	5e-05	0.000509113
vesicle docking protein	VaccDscaff1-augustus-gene-327.29	Initial_vs_Flower_bud	1.93511	up	0.0002	0.00178731
acyl-CoA oxidase 1	VaccDscaff197-augustus-gene-1.52	Initial_vs_Flower_bud	1.93562	up	0.00455	0.0256318
ARM repeat superfamily protein	VaccDscaff28-snap-gene-196.27	Initial_vs_Flower_bud	1.93719	up	0.0068	0.0355387
Integrin-linked protein kinase family	VaccDscaff28-snap-gene-145.17	Initial_vs_Flower_bud	1.93762	up	5e-05	0.000509113
putative thiol-disulfide oxidoreductase	VaccDscaff3-augustus-gene-171.31	Initial_vs_Flower_bud	1.9378	up	0.0012	0.00848185
RAB5 interacting factor	VaccDscaff47-augustus-gene-96.25	Initial_vs_Flower_bud	1.9382	up	0.0067	0.035103
protein SGT1 homolog	VaccDscaff29-augustus-gene-50.47	Initial_vs_Flower_bud	1.94003	up	0.0051	0.0280997
cryptochrome-interacting basic-helix-loop-helix 1	VaccDscaff14-snap-gene-373.33	Initial_vs_Flower_bud	1.94052	up	0.00415	0.0237389
mitochondrial ribosomal protein L58	VaccDscaff43-augustus-gene-231.44	Initial_vs_Flower_bud	1.94107	up	5e-05	0.000509113
Microsomal signal peptidase 25 kDa subunit (SPC25)	VaccDscaff48-augustus-gene-71.43	Initial_vs_Flower_bud	1.94113	up	0.0006	0.00468546
NADH dehydrogenase subunit 6	VaccDscaff27-snap-gene-107.29	Initial_vs_Flower_bud	1.94145	up	0.0017	0.0112779
pfkB-like carbohydrate kinase family protein	VaccDscaff25-processed-gene-109.36	Initial_vs_Flower_bud	1.94174	up	5e-05	0.000509113
UDP-glucosyl transferase 74B1	VaccDscaff3-augustus-gene-170.23	Initial_vs_Flower_bud	1.94418	up	0.0004	0.00328645
Nucleotide-diphospho-sugar transferase family protein	VaccDscaff1434-processed-gene-0.4	Initial_vs_Flower_bud	1.94449	up	0.0016	0.0107463
ESCRT 0 complex subunit sst4	VaccDscaff133-snap-gene-0.20	Initial_vs_Flower_bud	1.94543	up	0.00455	0.0256318
Fatty acid hydroxylase superfamily	VaccDscaff39-snap-gene-10.22	Initial_vs_Flower_bud	1.94545	up	0.00355	0.0208507
phospholipid N-methyltransferase	VaccDscaff34-snap-gene-52.30	Initial_vs_Flower_bud	1.94621	up	0.00525	0.0287909
putative sorbose reductase	VaccDscaff16-augustus-gene-7.29	Initial_vs_Flower_bud	1.95669	up	0.0001	0.000960986
pyruvate kinase	VaccDscaff29-augustus-gene-234.19	Initial_vs_Flower_bud	1.95844	up	0.00955	0.0467232
SGNH hydrolase-type esterase superfamily protein	VaccDscaff48-augustus-gene-69.28	Initial_vs_Flower_bud	1.95912	up	0.0051	0.0280997
AT-hook motif nuclear-localized protein 1	VaccDscaff48-snap-gene-91.43	Initial_vs_Flower_bud	1.96436	up	5e-05	0.000509113
probable GTP diphosphokinase CRSH1, chloroplastic	VaccDscaff8-processed-gene-412.2	Initial_vs_Flower_bud	1.96993	up	5e-05	0.000509113
glycosyltransferase family protein (DUF23)	VaccDscaff28-augustus-gene-121.28	Initial_vs_Flower_bud	1.97112	up	0.00025	0.00217815
endoplasmatic reticulum retrieval protein 1B	VaccDscaff18-augustus-gene-6.33	Initial_vs_Flower_bud	1.97545	up	0.0004	0.00328645
auxin transport protein (BIG)	VaccDscaff18-snap-gene-310.44	Initial_vs_Flower_bud	1.97818	up	5e-05	0.000509113
pyruvate kinase 2, cytosolic-like	VaccDscaff29-snap-gene-231.37	Initial_vs_Flower_bud	1.98036	up	5e-05	0.000509113
oxidoreductases, acting on NADH or NADPH, quinone or similar compound as acceptor	VaccDscaff47-augustus-gene-125.23	Initial_vs_Flower_bud	1.98383	up	0.0095	0.0465232
Eukaryotic aspartyl protease family protein	VaccDscaff28-processed-gene-224.4	Initial_vs_Flower_bud	1.98484	up	0.0023	0.0144852
chloroplast RNA-binding protein 33	VaccDscaff23-augustus-gene-260.33	Initial_vs_Flower_bud	1.98496	up	0.00235	0.0147509
ribonuclease T2	VaccDscaff23-augustus-gene-172.27	Initial_vs_Flower_bud	1.99032	up	5e-05	0.000509113
tubulin beta-1 chain-like	VaccDscaff1-augustus-gene-270.26	Initial_vs_Flower_bud	1.99325	up	0.0013	0.0090707
cytochrome B5	VaccDscaff29-snap-gene-28.33	Initial_vs_Flower_bud	1.99341	up	0.00015	0.00138565
uncharacterized protein	VaccDscaff1-snap-gene-372.39	Initial_vs_Flower_bud	2.00056	up	5e-05	0.000509113
YGGT family protein	VaccDscaff24-augustus-gene-325.19	Initial_vs_Flower_bud	2.00578	up	0.00095	0.00696513
KDEL receptor	VaccDscaff30-augustus-gene-99.15	Initial_vs_Flower_bud	2.00594	up	5e-05	0.000509113
UDP-glucose 6-dehydrogenase 5-like	VaccDscaff3-snap-gene-122.49	Initial_vs_Flower_bud	2.0063	up	5e-05	0.000509113
SNARE-like superfamily protein	VaccDscaff11-snap-gene-121.25	Initial_vs_Flower_bud	2.00974	up	0.00045	0.00364749
histidine triad nucleotide-binding 3	VaccDscaff47-augustus-gene-136.26	Initial_vs_Flower_bud	2.01022	up	0.00275	0.0168337
vacuoleless1 (VCL1)	VaccDscaff28-augustus-gene-47.24	Initial_vs_Flower_bud	2.01125	up	0.0001	0.000960986
potassium transporter 23-like	VaccDscaff8-snap-gene-163.23	Initial_vs_Flower_bud	2.01249	up	5e-05	0.000509113
coiled-coil domain containing 130	VaccDscaff28-augustus-gene-33.32	Initial_vs_Flower_bud	2.01301	up	0.0004	0.00328645
Mitochondrial substrate carrier family protein	VaccDscaff47-augustus-gene-14.30	Initial_vs_Flower_bud	2.0132	up	0.00385	0.0222963
P-glycoprotein 2	VaccDscaff3-augustus-gene-382.27	Initial_vs_Flower_bud	2.01557	up	5e-05	0.000509113
4-hydroxy-3-methylbut-2-enyl diphosphate synthase	VaccDscaff47-processed-gene-76.22	Initial_vs_Flower_bud	2.01578	up	5e-05	0.000509113
Leucine-rich receptor-like protein kinase family protein	VaccDscaff3-augustus-gene-47.22	Initial_vs_Flower_bud	2.01775	up	0.0082	0.0414109
PLAC8 family protein	VaccDscaff23-snap-gene-8.39	Initial_vs_Flower_bud	2.02003	up	0.00345	0.020355
MAP kinase substrate 1	VaccDscaff42-processed-gene-57.13	Initial_vs_Flower_bud	2.02725	up	0.0052	0.0285584
Small nuclear ribonucleoprotein family protein	VaccDscaff39-snap-gene-122.29	Initial_vs_Flower_bud	2.02754	up	0.00415	0.0237389
Pseudouridine synthase/archaeosine transglycosylase-like family protein	VaccDscaff1380-snap-gene-0.4	Initial_vs_Flower_bud	2.02969	up	0.0004	0.00328645
syntaxin of plants 52	VaccDscaff93-augustus-gene-4.25	Initial_vs_Flower_bud	2.02989	up	0.00025	0.00217815
NAC domain containing protein 2	VaccDscaff665-augustus-gene-0.12	Initial_vs_Flower_bud	2.03169	up	0.00785	0.0399544
bromodomain containing 8	VaccDscaff29-snap-gene-340.39	Initial_vs_Flower_bud	2.03233	up	0.0063	0.033355
Exostosin family protein	VaccDscaff47-processed-gene-67.1	Initial_vs_Flower_bud	2.03255	up	0.0013	0.0090707
CBL-interacting protein kinase 24-like	VaccDscaff40-snap-gene-249.22	Initial_vs_Flower_bud	2.03517	up	0.0014	0.00964257
magnesium transporter, putative (DUF803)	VaccDscaff227-snap-gene-0.48	Initial_vs_Flower_bud	2.03635	up	0.0001	0.000960986
O-acetyltransferase family protein	VaccDscaff20-snap-gene-196.36	Initial_vs_Flower_bud	2.03694	up	5e-05	0.000509113
zinc ion binding protein	VaccDscaff1-snap-gene-353.31	Initial_vs_Flower_bud	2.03843	up	0.00015	0.00138565
protein tyrosine phosphatase 1	VaccDscaff37-augustus-gene-108.26	Initial_vs_Flower_bud	2.04168	up	5e-05	0.000509113
pale cress protein (PAC)	VaccDscaff46-processed-gene-187.14	Initial_vs_Flower_bud	2.05035	up	0.0004	0.00328645
UDP-glucuronic acid decarboxylase 1	VaccDscaff34-snap-gene-319.29	Initial_vs_Flower_bud	2.0526	up	5e-05	0.000509113
Major facilitator superfamily protein	VaccDscaff39-augustus-gene-150.21	Initial_vs_Flower_bud	2.05401	up	0.00615	0.0327138
heptahelical transmembrane protein2	VaccDscaff70-augustus-gene-5.27	Initial_vs_Flower_bud	2.0547	up	0.00785	0.0399544
beta-D-xylosidase 4	VaccDscaff27-snap-gene-85.30	Initial_vs_Flower_bud	2.05629	up	5e-05	0.000509113
FK506-binding protein 15 kD-1	VaccDscaff47-augustus-gene-137.37	Initial_vs_Flower_bud	2.06515	up	0.0032	0.0191338
PDS5 cohesin associated factor B	VaccDscaff86-snap-gene-5.75	Initial_vs_Flower_bud	2.06523	up	0.0003	0.00255629
tonoplast dicarboxylate transporter	VaccDscaff112-augustus-gene-3.57	Initial_vs_Flower_bud	2.06587	up	0.0003	0.00255629
tetraspanin2	VaccDscaff29-processed-gene-2.4	Initial_vs_Flower_bud	2.0668	up	5e-05	0.000509113
S-adenosyl-L-methionine-dependent methyltransferases superfamily protein	VaccDscaff23-augustus-gene-341.21	Initial_vs_Flower_bud	2.06975	up	0.0015	0.0101994
delta(3), delta(2)-enoyl CoA isomerase 1	VaccDscaff19-processed-gene-53.5	Initial_vs_Flower_bud	2.07054	up	5e-05	0.000509113
peroxiredoxin IIF	VaccDscaff1-augustus-gene-74.31	Initial_vs_Flower_bud	2.07172	up	5e-05	0.000509113
DEA(D/H)-box RNA helicase family protein	VaccDscaff28-snap-gene-117.31	Initial_vs_Flower_bud	2.07797	up	0.0001	0.000960986
SPOUT domain containing methyltransferase 1	VaccDscaff8-augustus-gene-350.16	Initial_vs_Flower_bud	2.0794	up	5e-05	0.000509113
GRIM-19 protein	VaccDscaff3-augustus-gene-328.22	Initial_vs_Flower_bud	2.08283	up	0.00925	0.0455824
DEAD-box ATP-dependent RNA helicase 22-like	VaccDscaff4-augustus-gene-308.24	Initial_vs_Flower_bud	2.08306	up	0.0002	0.00178731
CCR4-NOT transcription complex, subunit 4	VaccDscaff15-augustus-gene-295.27	Initial_vs_Flower_bud	2.08633	up	0.0013	0.0090707
Ankyrin repeat family protein with DHHC zinc finger domain-containing protein	VaccDscaff14-augustus-gene-339.29	Initial_vs_Flower_bud	2.08841	up	0.00295	0.017862
Peptidyl-tRNA hydrolase family protein	VaccDscaff4-snap-gene-335.24	Initial_vs_Flower_bud	2.08921	up	5e-05	0.000509113
phosphate transporter 2;1	VaccDscaff4-augustus-gene-291.25	Initial_vs_Flower_bud	2.09852	up	0.0016	0.0107463
proteasome inhibitor-like protein	VaccDscaff34-augustus-gene-251.24	Initial_vs_Flower_bud	2.09934	up	5e-05	0.000509113
dolichyl-diphosphooligosaccharide--protein glycosyltransferase 48 kDa subunit-like	VaccDscaff14-augustus-gene-368.27	Initial_vs_Flower_bud	2.09948	up	5e-05	0.000509113
plastid movement impaired 2	VaccDscaff44-processed-gene-195.2	Initial_vs_Flower_bud	2.10146	up	0.00285	0.0173568
Mannose-P-dolichol utilization defect 1 protein	VaccDscaff23-snap-gene-335.32	Initial_vs_Flower_bud	2.10257	up	5e-05	0.000509113
Ribosomal protein S30 family protein	VaccDscaff29-snap-gene-0.35	Initial_vs_Flower_bud	2.1032	up	0.0007	0.00535742
GHMP kinase family protein	VaccDscaff48-augustus-gene-40.27	Initial_vs_Flower_bud	2.10345	up	0.0001	0.000960986
Phototropic-responsive NPH3 family protein	VaccDscaff28-processed-gene-137.15	Initial_vs_Flower_bud	2.10575	up	0.0099	0.0481097
nucleic acid/nucleotide binding protein	VaccDscaff18-snap-gene-186.33	Initial_vs_Flower_bud	2.10843	up	0.0005	0.00400018
calcium uniporter-like protein (DUF607)	VaccDscaff47-augustus-gene-126.40	Initial_vs_Flower_bud	2.11353	up	0.0002	0.00178731
Exostosin family protein	VaccDscaff4-augustus-gene-392.40	Initial_vs_Flower_bud	2.11518	up	5e-05	0.000509113
glucuronidase 2	VaccDscaff4-augustus-gene-353.39	Initial_vs_Flower_bud	2.11688	up	0.00085	0.00632968
elongation factor 1-alpha-like	VaccDscaff47-snap-gene-79.33	Initial_vs_Flower_bud	2.11735	up	5e-05	0.000509113
transducin beta like 2	VaccDscaff23-augustus-gene-126.36	Initial_vs_Flower_bud	2.1226	up	0.00095	0.00696513
multiple chloroplast division site 1	VaccDscaff23-snap-gene-363.31	Initial_vs_Flower_bud	2.12431	up	0.00075	0.00568581
protoporphyrinogen oxidase, mitochondrial	VaccDscaff18-augustus-gene-381.33	Initial_vs_Flower_bud	2.12466	up	0.0058	0.0312156
cell division cycle 40	VaccDscaff4-snap-gene-303.27	Initial_vs_Flower_bud	2.12512	up	0.00315	0.0188828
Plant neutral invertase family protein	VaccDscaff3-snap-gene-71.49	Initial_vs_Flower_bud	2.1252	up	0.0004	0.00328645
Uncharacterized protein family (UPF0497)	VaccDscaff4-augustus-gene-63.31	Initial_vs_Flower_bud	2.12552	up	0.00035	0.00292308
Chitinase family protein	VaccDscaff3-snap-gene-261.13	Initial_vs_Flower_bud	2.13004	up	0.0055	0.0298735
stomatin like 2	VaccDscaff29-augustus-gene-22.30	Initial_vs_Flower_bud	2.13511	up	5e-05	0.000509113
Pectin lyase-like superfamily protein	VaccDscaff3-augustus-gene-177.37	Initial_vs_Flower_bud	2.13667	up	0.00205	0.0131537
mitochondrial outer membrane protein porin 6-like	VaccDscaff70-augustus-gene-0.32	Initial_vs_Flower_bud	2.14004	up	0.0028	0.0170969
Major facilitator superfamily protein	VaccDscaff3-snap-gene-427.29	Initial_vs_Flower_bud	2.14123	up	5e-05	0.000509113
Cleavage and polyadenylation specificity factor (CPSF) A subunit protein	VaccDscaff48-augustus-gene-63.27	Initial_vs_Flower_bud	2.14415	up	0.0044	0.0249164
eukaryotic translation initiation factor NCBP-like	VaccDscaff1-augustus-gene-309.27	Initial_vs_Flower_bud	2.15235	up	0.00775	0.0395426
Mitochondrial import inner membrane translocase subunit Tim17/Tim22/Tim23 family protein	VaccDscaff47-augustus-gene-188.34	Initial_vs_Flower_bud	2.15396	up	5e-05	0.000509113
QWRF motif protein (DUF566)	VaccDscaff39-snap-gene-43.35	Initial_vs_Flower_bud	2.15963	up	0.0022	0.0139552
single-stranded DNA endonuclease family protein	VaccDscaff29-augustus-gene-65.24	Initial_vs_Flower_bud	2.15983	up	0.00195	0.0126184
calcium-dependent protein kinase 19	VaccDscaff1-processed-gene-295.22	Initial_vs_Flower_bud	2.16035	up	5e-05	0.000509113
RING/U-box superfamily protein with ARM repeat domain-containing protein	VaccDscaff112-snap-gene-2.31	Initial_vs_Flower_bud	2.16111	up	5e-05	0.000509113
chromatin remodeling factor17	VaccDscaff8-augustus-gene-379.31	Initial_vs_Flower_bud	2.16527	up	5e-05	0.000509113
plastid transcriptionally active 16	VaccDscaff24-augustus-gene-77.41	Initial_vs_Flower_bud	2.17035	up	0.00665	0.0348852
peptidyl-tRNA hydrolase 2	VaccDscaff48-augustus-gene-108.37	Initial_vs_Flower_bud	2.17057	up	0.00015	0.00138565
UDP-glucose 6-dehydrogenase family protein	VaccDscaff18-processed-gene-324.3	Initial_vs_Flower_bud	2.17098	up	0.0075	0.0385183
Yip1 interacting factor homolog B (S. cerevisiae)	VaccDscaff22-processed-gene-336.0	Initial_vs_Flower_bud	2.17368	up	0.0003	0.00255629
myosin-binding protein (Protein of unknown function, DUF593)	VaccDscaff70-augustus-gene-5.34	Initial_vs_Flower_bud	2.17532	up	0.00075	0.00568581
ABC transporter family protein	VaccDscaff37-snap-gene-181.38	Initial_vs_Flower_bud	2.17608	up	0.0012	0.00848185
plant-specific TFIIB-related protein	VaccDscaff42-augustus-gene-89.20	Initial_vs_Flower_bud	2.17648	up	0.00025	0.00217815
SCAMP family protein	VaccDscaff3-augustus-gene-399.29	Initial_vs_Flower_bud	2.18314	up	0.0089	0.0442415
Tetratricopeptide repeat (TPR)-like superfamily protein	VaccDscaff47-snap-gene-181.41	Initial_vs_Flower_bud	2.18616	up	0.0004	0.00328645
RAB geranylgeranyl transferase beta subunit 1	VaccDscaff189-augustus-gene-1.27	Initial_vs_Flower_bud	2.18699	up	5e-05	0.000509113
geranylgeranyl pyrophosphate synthase, chloroplastic	VaccDscaff23-augustus-gene-337.35	Initial_vs_Flower_bud	2.18754	up	0.00145	0.00992179
ribonuclease 2	VaccDscaff47-snap-gene-129.48	Initial_vs_Flower_bud	2.18903	up	0.0022	0.0139552
CONSTANS-like 5	VaccDscaff39-augustus-gene-4.25	Initial_vs_Flower_bud	2.1918	up	5e-05	0.000509113
Class I glutamine amidotransferase-like superfamily protein	VaccDscaff3-snap-gene-27.26	Initial_vs_Flower_bud	2.19188	up	0.00045	0.00364749
ATP synthase mitochondrial F1 complex assembly factor 1	VaccDscaff4-augustus-gene-226.34	Initial_vs_Flower_bud	2.19218	up	0.0002	0.00178731
P-loop containing nucleoside triphosphate hydrolases superfamily protein	VaccDscaff29-processed-gene-29.0	Initial_vs_Flower_bud	2.19227	up	0.0051	0.0280997
Ubiquitin-conjugating enzyme family protein	VaccDscaff3-snap-gene-164.28	Initial_vs_Flower_bud	2.19523	up	0.0003	0.00255629
9-cis-epoxycarotenoid dioxygenase 2	VaccDscaff24-processed-gene-122.11	Initial_vs_Flower_bud	2.20144	up	5e-05	0.000509113
histone mono-ubiquitination 2	VaccDscaff24-snap-gene-219.42	Initial_vs_Flower_bud	2.20153	up	5e-05	0.000509113
F-box/RNI-like/FBD-like domains-containing protein	VaccDscaff23-processed-gene-344.1	Initial_vs_Flower_bud	2.20224	up	5e-05	0.000509113
hypothetical protein	VaccDscaff9-snap-gene-211.35	Initial_vs_Flower_bud	2.20274	up	0.0029	0.0176082
hypothetical protein	VaccDscaff3-snap-gene-383.44	Initial_vs_Flower_bud	2.20505	up	0.0009	0.00664913
inositol transporter 1	VaccDscaff3-augustus-gene-266.22	Initial_vs_Flower_bud	2.20572	up	0.00305	0.018373
remorin 4.1-like	VaccDscaff3-augustus-gene-192.29	Initial_vs_Flower_bud	2.20867	up	0.0023	0.0144852
Pentatricopeptide repeat (PPR-like) superfamily protein	VaccDscaff3-snap-gene-206.40	Initial_vs_Flower_bud	2.21048	up	0.0002	0.00178731
exocyst complex component sec5	VaccDscaff42-snap-gene-35.23	Initial_vs_Flower_bud	2.2105	up	0.00185	0.0120815
Granulin repeat cysteine protease family protein	VaccDscaff4-snap-gene-218.31	Initial_vs_Flower_bud	2.21631	up	0.00575	0.0309915
glycyl-tRNA synthetase / glycine-tRNA ligase	VaccDscaff4-augustus-gene-392.39	Initial_vs_Flower_bud	2.21927	up	5e-05	0.000509113
PA-domain containing subtilase family protein	VaccDscaff23-augustus-gene-81.14	Initial_vs_Flower_bud	2.22095	up	5e-05	0.000509113
beta carbonic anhydrase 5	VaccDscaff34-augustus-gene-237.33	Initial_vs_Flower_bud	2.22224	up	0.0014	0.00964257
ALG5 dolichyl-phosphate beta-glucosyltransferase	VaccDscaff28-snap-gene-302.56	Initial_vs_Flower_bud	2.22312	up	5e-05	0.000509113
Integrase-type DNA-binding superfamily protein	VaccDscaff14-augustus-gene-273.30	Initial_vs_Flower_bud	2.22376	up	0.0075	0.0385183
autophagy-related protein 8C-like	VaccDscaff4-augustus-gene-169.20	Initial_vs_Flower_bud	2.22428	up	0.00015	0.00138565
carboxyesterase 13	VaccDscaff3-processed-gene-8.1	Initial_vs_Flower_bud	2.22692	up	0.00565	0.0305475
Prenyltransferase family protein	VaccDscaff28-augustus-gene-302.43	Initial_vs_Flower_bud	2.22717	up	5e-05	0.000509113
Peroxidase superfamily protein	VaccDscaff39-augustus-gene-148.12	Initial_vs_Flower_bud	2.22922	up	5e-05	0.000509113
photosystem II 5 kDa protein, chloroplastic	VaccDscaff41-snap-gene-105.45	Initial_vs_Flower_bud	2.23054	up	5e-05	0.000509113
nudix hydrolase 1	VaccDscaff19-snap-gene-118.26	Initial_vs_Flower_bud	2.23065	up	0.0024	0.0150115
ENTH/ANTH/VHS superfamily protein	VaccDscaff39-augustus-gene-75.28	Initial_vs_Flower_bud	2.23089	up	0.0017	0.0112779
cyclin p3;1	VaccDscaff22-augustus-gene-45.41	Initial_vs_Flower_bud	2.23096	up	0.00125	0.0087766
Thioredoxin superfamily protein	VaccDscaff3-processed-gene-416.13	Initial_vs_Flower_bud	2.23225	up	0.00025	0.00217815
F-box SKIP23-like protein (DUF295)	VaccDscaff28-processed-gene-63.5	Initial_vs_Flower_bud	2.23264	up	0.00025	0.00217815
LisH and RanBPM domains containing protein	VaccDscaff4-snap-gene-191.24	Initial_vs_Flower_bud	2.23629	up	0.00025	0.00217815
NAD(P)-binding Rossmann-fold superfamily protein	VaccDscaff1-augustus-gene-160.35	Initial_vs_Flower_bud	2.23791	up	0.001	0.0072762
CLK4 associating serine/arginine rich protein	VaccDscaff30-snap-gene-240.10	Initial_vs_Flower_bud	2.24288	up	5e-05	0.000509113
photosystem I reaction center subunit II, chloroplastic-like	VaccDscaff1-processed-gene-68.5	Initial_vs_Flower_bud	2.2438	up	5e-05	0.000509113
alpha carbonic anhydrase 4	VaccDscaff29-augustus-gene-316.28	Initial_vs_Flower_bud	2.25212	up	5e-05	0.000509113
tubulin alpha-2 chain	VaccDscaff31-augustus-gene-295.31	Initial_vs_Flower_bud	2.25313	up	5e-05	0.000509113
GTP cyclohydrolase II	VaccDscaff39-augustus-gene-83.22	Initial_vs_Flower_bud	2.25925	up	5e-05	0.000509113
Actin binding Calponin homology (CH) domain-containing protein	VaccDscaff24-augustus-gene-51.33	Initial_vs_Flower_bud	2.26157	up	0.00015	0.00138565
HAUS augmin-like complex subunit	VaccDscaff29-augustus-gene-311.40	Initial_vs_Flower_bud	2.26541	up	5e-05	0.000509113
glucuronokinase G	VaccDscaff18-augustus-gene-373.30	Initial_vs_Flower_bud	2.27706	up	5e-05	0.000509113
RNA polymerase III subunit K	VaccDscaff37-snap-gene-141.34	Initial_vs_Flower_bud	2.28404	up	5e-05	0.000509113
phosphatidylserine decarboxylase 2	VaccDscaff3-snap-gene-36.40	Initial_vs_Flower_bud	2.28482	up	0.0033	0.0196304
ATP synthase protein I-like protein	VaccDscaff39-augustus-gene-240.23	Initial_vs_Flower_bud	2.29101	up	0.0002	0.00178731
vacuolar ATP synthase subunit C (VATC) / V-ATPase C subunit / vacuolar proton pump C subunit (DET3)	VaccDscaff34-snap-gene-66.31	Initial_vs_Flower_bud	2.2961	up	5e-05	0.000509113
putative ubiquitin/metalloprotease fusion protein	VaccDscaff37-snap-gene-13.42	Initial_vs_Flower_bud	2.29783	up	0.0047	0.0262955
putative phospholipid scramblase	VaccDscaff29-augustus-gene-18.32	Initial_vs_Flower_bud	2.30066	up	0.0065	0.0342384
Peroxidase superfamily protein	VaccDscaff30-augustus-gene-254.20	Initial_vs_Flower_bud	2.30208	up	0.00995	0.0483037
magnesium transporter 6	VaccDscaff3-snap-gene-43.32	Initial_vs_Flower_bud	2.30237	up	0.00495	0.0274362
SAC3/GANP/Nin1/mts3/eIF-3 p25 family	VaccDscaff1-augustus-gene-49.19	Initial_vs_Flower_bud	2.30605	up	0.00315	0.0188828
early nodulin-93	VaccDscaff23-augustus-gene-28.27	Initial_vs_Flower_bud	2.30653	up	0.0025	0.0155349
pentatricopeptide (PPR) repeat protein	VaccDscaff24-snap-gene-323.27	Initial_vs_Flower_bud	2.31643	up	0.00065	0.00502564
serine hydroxymethyltransferase 6	VaccDscaff34-augustus-gene-223.22	Initial_vs_Flower_bud	2.32005	up	5e-05	0.000509113
xyloglucan endotransglucosylase/hydrolase 9	VaccDscaff52-augustus-gene-15.38	Initial_vs_Flower_bud	2.32039	up	0.0013	0.0090707
tonoplast intrinsic protein 4;1	VaccDscaff28-augustus-gene-108.25	Initial_vs_Flower_bud	2.32813	up	0.0081	0.0409946
Transducin/WD40 repeat-like superfamily protein	VaccDscaff1-snap-gene-373.47	Initial_vs_Flower_bud	2.33201	up	0.00645	0.0340164
Bm-MIF-1, identical	VaccDscaff34-snap-gene-279.54	Initial_vs_Flower_bud	2.33567	up	5e-05	0.000509113
rhomboid protein-like protein	VaccDscaff29-snap-gene-170.30	Initial_vs_Flower_bud	2.33848	up	0.0001	0.000960986
Duplicated homeodomain-like superfamily protein	VaccDscaff4-augustus-gene-317.25	Initial_vs_Flower_bud	2.34137	up	0.00335	0.0198581
early-responsive to dehydration stress protein (ERD4)	VaccDscaff42-snap-gene-24.30	Initial_vs_Flower_bud	2.34322	up	5e-05	0.000509113
phospholipase D alpha 1	VaccDscaff23-augustus-gene-33.25	Initial_vs_Flower_bud	2.34656	up	0.00665	0.0348852
prolyl endopeptidase	VaccDscaff18-processed-gene-10.9	Initial_vs_Flower_bud	2.34693	up	5e-05	0.000509113
Msp1p	VaccDscaff47-snap-gene-186.37	Initial_vs_Flower_bud	2.34859	up	0.0015	0.0101994
Chaperonin-like RbcX protein	VaccDscaff39-augustus-gene-151.25	Initial_vs_Flower_bud	2.3502	up	0.0077	0.0393343
BR-signaling kinase 3	VaccDscaff22-augustus-gene-23.35	Initial_vs_Flower_bud	2.35508	up	5e-05	0.000509113
Aldolase-type TIM barrel family protein	VaccDscaff4-snap-gene-176.23	Initial_vs_Flower_bud	2.35769	up	5e-05	0.000509113
glycosyltransferase 18	VaccDscaff29-processed-gene-77.6	Initial_vs_Flower_bud	2.36038	up	0.0007	0.00535742
S-adenosyl-L-methionine-dependent methyltransferases superfamily protein	VaccDscaff1331-augustus-gene-0.6	Initial_vs_Flower_bud	2.36284	up	5e-05	0.000509113
DENN domain containing 6A	VaccDscaff87-snap-gene-5.71	Initial_vs_Flower_bud	2.3693	up	0.0029	0.0176082
O-fucosyltransferase family protein	VaccDscaff4-augustus-gene-319.23	Initial_vs_Flower_bud	2.37032	up	0.0058	0.0312156
hypersensitive-induced response protein 1-like	VaccDscaff4-processed-gene-315.5	Initial_vs_Flower_bud	2.37042	up	5e-05	0.000509113
luminal-binding protein 5	VaccDscaff28-augustus-gene-6.26	Initial_vs_Flower_bud	2.37047	up	5e-05	0.000509113
Rad23 UV excision repair protein family	VaccDscaff34-snap-gene-56.50	Initial_vs_Flower_bud	2.37113	up	0.00675	0.035322
Pyridoxal phosphate phosphatase-related protein	VaccDscaff42-processed-gene-250.5	Initial_vs_Flower_bud	2.37242	up	0.00915	0.0451879
Pentatricopeptide repeat (PPR) superfamily protein	VaccDscaff306-snap-gene-0.52	Initial_vs_Flower_bud	2.37302	up	0.00325	0.0193808
global transcription factor C (Spt16)	VaccDscaff23-augustus-gene-49.37	Initial_vs_Flower_bud	2.37477	up	5e-05	0.000509113
actin	VaccDscaff47-processed-gene-93.3	Initial_vs_Flower_bud	2.37713	up	0.0005	0.00400018
auxin transporter-like protein 2	VaccDscaff1-augustus-gene-212.15	Initial_vs_Flower_bud	2.38236	up	0.00105	0.00757987
GATA transcription factor 1	VaccDscaff3-augustus-gene-329.27	Initial_vs_Flower_bud	2.38329	up	0.00745	0.0383035
Hyp O-arabinosyltransferase-like protein	VaccDscaff779-augustus-gene-0.6	Initial_vs_Flower_bud	2.38931	up	0.0005	0.00400018
RAB GTPase homolog H1E	VaccDscaff42-augustus-gene-48.37	Initial_vs_Flower_bud	2.39427	up	0.0085	0.0426621
phosphorylcholine cytidylyltransferase	VaccDscaff24-snap-gene-166.35	Initial_vs_Flower_bud	2.39627	up	5e-05	0.000509113
ferric reduction oxidase 7	VaccDscaff34-augustus-gene-198.23	Initial_vs_Flower_bud	2.39733	up	5e-05	0.000509113
PWP1 homolog, endonuclein	VaccDscaff15-augustus-gene-370.24	Initial_vs_Flower_bud	2.39944	up	0.0007	0.00535742
vacuolar ATP synthase subunit H family protein	VaccDscaff858-snap-gene-0.8	Initial_vs_Flower_bud	2.40043	up	0.0004	0.00328645
CBL-interacting protein kinase 5	VaccDscaff28-augustus-gene-68.22	Initial_vs_Flower_bud	2.40391	up	5e-05	0.000509113
homeobox protein knotted-1-like 1	VaccDscaff34-augustus-gene-185.23	Initial_vs_Flower_bud	2.40487	up	5e-05	0.000509113
protein disulfide isomerase	VaccDscaff377-augustus-gene-0.25	Initial_vs_Flower_bud	2.40525	up	5e-05	0.000509113
ribose-5-phosphate isomerase 2	VaccDscaff28-processed-gene-205.4	Initial_vs_Flower_bud	2.40825	up	5e-05	0.000509113
stromal cell-derived factor 2-like protein precursor	VaccDscaff34-augustus-gene-50.31	Initial_vs_Flower_bud	2.4095	up	0.0002	0.00178731
ubiquitin-specific protease 19	VaccDscaff91-augustus-gene-3.28	Initial_vs_Flower_bud	2.41028	up	0.00845	0.0424535
dicarboxylate transporter 1	VaccDscaff39-augustus-gene-152.17	Initial_vs_Flower_bud	2.41426	up	0.00925	0.0455824
dual specificity phosphatase 12	VaccDscaff29-augustus-gene-303.16	Initial_vs_Flower_bud	2.41599	up	0.0018	0.0118272
ALWAYS EARLY 4	VaccDscaff39-augustus-gene-56.26	Initial_vs_Flower_bud	2.41652	up	0.0001	0.000960986
O-fucosyltransferase family protein	VaccDscaff4-augustus-gene-407.27	Initial_vs_Flower_bud	2.41777	up	5e-05	0.000509113
Leucine-rich repeat (LRR) family protein	VaccDscaff34-processed-gene-43.1	Initial_vs_Flower_bud	2.41955	up	0.0014	0.00964257
heterogeneous nuclear ribonucleoprotein U-like 1	VaccDscaff35-augustus-gene-93.25	Initial_vs_Flower_bud	2.41999	up	5e-05	0.000509113
putative enzyme	VaccDscaff42-augustus-gene-225.21	Initial_vs_Flower_bud	2.42388	up	0.00255	0.015794
ROP-interactive CRIB motif-containing protein 10	VaccDscaff15-snap-gene-192.36	Initial_vs_Flower_bud	2.42456	up	0.00235	0.0147509
hypothetical protein	VaccDscaff26-processed-gene-252.17	Initial_vs_Flower_bud	2.43255	up	0.00065	0.00502564
Galactose oxidase/kelch repeat superfamily protein	VaccDscaff47-processed-gene-77.4	Initial_vs_Flower_bud	2.43312	up	0.0033	0.0196304
lactamase beta 2 L homeolog	VaccDscaff28-snap-gene-212.35	Initial_vs_Flower_bud	2.43323	up	0.0001	0.000960986
tryptophan biosynthesis 1	VaccDscaff18-augustus-gene-365.21	Initial_vs_Flower_bud	2.43629	up	0.0064	0.0337963
ethylene-responsive transcription factor 2	VaccDscaff48-processed-gene-87.8	Initial_vs_Flower_bud	2.43668	up	5e-05	0.000509113
uncharacterized LOC4337935	VaccDscaff48-augustus-gene-37.39	Initial_vs_Flower_bud	2.43741	up	0.0007	0.00535742
cytokinin oxidase 5	VaccDscaff12-processed-gene-61.13	Initial_vs_Flower_bud	2.43867	up	0.00095	0.00696513
aminopeptidase P1	VaccDscaff30-augustus-gene-221.30	Initial_vs_Flower_bud	2.43987	up	0.00495	0.0274362
GATA type zinc finger transcription factor family protein	VaccDscaff48-augustus-gene-72.34	Initial_vs_Flower_bud	2.44504	up	0.002	0.0128861
small G protein family protein / RhoGAP family protein	VaccDscaff29-augustus-gene-91.48	Initial_vs_Flower_bud	2.45086	up	0.00695	0.0361801
erf domain protein 9	VaccDscaff35-processed-gene-110.3	Initial_vs_Flower_bud	2.45576	up	0.0001	0.000960986
Tetratricopeptide repeat (TPR)-like superfamily protein	VaccDscaff4-snap-gene-324.45	Initial_vs_Flower_bud	2.45766	up	0.00015	0.00138565
TBCC domain containing 1	VaccDscaff33-augustus-gene-15.25	Initial_vs_Flower_bud	2.46242	up	5e-05	0.000509113
Aldolase superfamily protein	VaccDscaff1-augustus-gene-455.24	Initial_vs_Flower_bud	2.46325	up	0.0088	0.0438342
NADPH-dependent thioredoxin reductase C	VaccDscaff29-snap-gene-319.24	Initial_vs_Flower_bud	2.46357	up	0.00195	0.0126184
heptahelical transmembrane protein1	VaccDscaff60-snap-gene-7.24	Initial_vs_Flower_bud	2.46516	up	0.0034	0.0201079
EFR3 homolog A	VaccDscaff34-augustus-gene-185.24	Initial_vs_Flower_bud	2.46547	up	5e-05	0.000509113
ubiquitin specific peptidase 54	VaccDscaff34-snap-gene-121.45	Initial_vs_Flower_bud	2.46646	up	0.0015	0.0101994
vacuolar protein sorting-associated protein 20.2	VaccDscaff42-augustus-gene-26.26	Initial_vs_Flower_bud	2.4668	up	5e-05	0.000509113
MBOAT (membrane bound O-acyl transferase) family protein	VaccDscaff47-snap-gene-12.35	Initial_vs_Flower_bud	2.47338	up	0.00125	0.0087766
ribosomal RNA processing 12 homolog	VaccDscaff159-snap-gene-2.46	Initial_vs_Flower_bud	2.48507	up	5e-05	0.000509113
AIG2-like (avirulence induced gene) family protein	VaccDscaff3-snap-gene-260.31	Initial_vs_Flower_bud	2.48864	up	5e-05	0.000509113
MAP kinase kinase 6	VaccDscaff42-augustus-gene-269.52	Initial_vs_Flower_bud	2.48945	up	0.0072	0.0372345
inositol-tetrakisphosphate 1-kinase 2-like	VaccDscaff3-snap-gene-15.44	Initial_vs_Flower_bud	2.49111	up	0.0068	0.0355387
S-adenosyl-L-methionine-dependent methyltransferases superfamily protein	VaccDscaff47-augustus-gene-9.14	Initial_vs_Flower_bud	2.4944	up	5e-05	0.000509113
asparagine-linked glycosylation 3	VaccDscaff51-snap-gene-13.53	Initial_vs_Flower_bud	2.49555	up	0.00035	0.00292308
ammonium transporter	VaccDscaff47-processed-gene-109.3	Initial_vs_Flower_bud	2.504	up	0.0004	0.00328645
Pentatricopeptide repeat (PPR) superfamily protein	VaccDscaff28-processed-gene-77.15	Initial_vs_Flower_bud	2.5067	up	5e-05	0.000509113
arginine/serine-rich 45	VaccDscaff90-augustus-gene-0.26	Initial_vs_Flower_bud	2.51083	up	5e-05	0.000509113
replication termination factor 2 domain containing 1	VaccDscaff39-processed-gene-18.4	Initial_vs_Flower_bud	2.51568	up	0.00135	0.00935942
binding protein	VaccDscaff234-augustus-gene-0.39	Initial_vs_Flower_bud	2.51972	up	0.00015	0.00138565
Tetratricopeptide repeat (TPR)-like superfamily protein	VaccDscaff47-processed-gene-7.4	Initial_vs_Flower_bud	2.52063	up	5e-05	0.000509113
EF hand calcium-binding protein family	VaccDscaff39-processed-gene-41.8	Initial_vs_Flower_bud	2.53054	up	0.00035	0.00292308
F-box/RNI-like superfamily protein	VaccDscaff3-snap-gene-256.36	Initial_vs_Flower_bud	2.53158	up	0.0002	0.00178731
ubiquitin-conjugating enzyme 33	VaccDscaff17-augustus-gene-366.24	Initial_vs_Flower_bud	2.53322	up	0.0008	0.00600935
Major facilitator superfamily protein	VaccDscaff29-processed-gene-113.0	Initial_vs_Flower_bud	2.53818	up	5e-05	0.000509113
ASYMMETRIC LEAVES 2-like 1	VaccDscaff42-processed-gene-66.5	Initial_vs_Flower_bud	2.54172	up	5e-05	0.000509113
Pectin lyase-like superfamily protein	VaccDscaff273-augustus-gene-0.54	Initial_vs_Flower_bud	2.54506	up	5e-05	0.000509113
receptor like protein 4	VaccDscaff3-snap-gene-114.21	Initial_vs_Flower_bud	2.55696	up	0.0065	0.0342384
PHD finger family protein	VaccDscaff1727-augustus-gene-0.3	Initial_vs_Flower_bud	2.55761	up	0.0006	0.00468546
MBOAT (membrane bound O-acyl transferase) family protein	VaccDscaff93-processed-gene-4.8	Initial_vs_Flower_bud	2.56062	up	0.00895	0.0444405
SKP1 interacting partner 6	VaccDscaff39-processed-gene-103.12	Initial_vs_Flower_bud	2.56203	up	0.00015	0.00138565
Haloacid dehalogenase-like hydrolase (HAD) superfamily protein	VaccDscaff4-processed-gene-378.7	Initial_vs_Flower_bud	2.56249	up	0.00305	0.018373
Pentatricopeptide repeat (PPR) superfamily protein	VaccDscaff32-processed-gene-264.4	Initial_vs_Flower_bud	2.56279	up	0.00325	0.0193808
F-box family protein	VaccDscaff29-augustus-gene-261.39	Initial_vs_Flower_bud	2.56381	up	0.0035	0.0206034
SKP1 interacting partner 4	VaccDscaff22-augustus-gene-22.31	Initial_vs_Flower_bud	2.56659	up	0.00665	0.0348852
homolog of bacterial cytokinesis Z-ring protein FTSZ 1-1	VaccDscaff1-augustus-gene-444.34	Initial_vs_Flower_bud	2.56784	up	0.00045	0.00364749
hypothetical protein	VaccDscaff24-snap-gene-227.16	Initial_vs_Flower_bud	2.56791	up	0.004	0.0230233
glycine-rich protein 2	VaccDscaff3-processed-gene-256.2	Initial_vs_Flower_bud	2.57292	up	0.00975	0.047509
P-loop containing nucleoside triphosphate hydrolases superfamily protein	VaccDscaff29-processed-gene-229.2	Initial_vs_Flower_bud	2.57348	up	0.00575	0.0309915
nuclear poly(a) polymerase	VaccDscaff3-snap-gene-426.31	Initial_vs_Flower_bud	2.5764	up	5e-05	0.000509113
ER lumen protein-retaining receptor erd-2.2	VaccDscaff30-augustus-gene-103.12	Initial_vs_Flower_bud	2.57805	up	0.00605	0.0323192
glutaredoxin 3	VaccDscaff20-augustus-gene-182.16	Initial_vs_Flower_bud	2.58311	up	0.00035	0.00292308
poly(A) polymerase 1	VaccDscaff3-augustus-gene-105.21	Initial_vs_Flower_bud	2.58623	up	0.0041	0.0235034
membrane associated ring-CH-type finger 8	VaccDscaff31-augustus-gene-42.22	Initial_vs_Flower_bud	2.58771	up	5e-05	0.000509113
white-brown complex-like protein	VaccDscaff3-augustus-gene-31.27	Initial_vs_Flower_bud	2.59418	up	0.00025	0.00217815
senescence-associated family protein, putative (DUF581)	VaccDscaff23-augustus-gene-234.11	Initial_vs_Flower_bud	2.59448	up	5e-05	0.000509113
strigolactone esterase D14-like	VaccDscaff97-augustus-gene-0.27	Initial_vs_Flower_bud	2.59567	up	0.0013	0.0090707
ATP binding protein	VaccDscaff23-snap-gene-19.45	Initial_vs_Flower_bud	2.59818	up	0.0003	0.00255629
acetyl-CoA carboxylase beta subunit	VaccDscaff42-augustus-gene-50.31	Initial_vs_Flower_bud	2.60057	up	0.0002	0.00178731
chorismate synthase 2	VaccDscaff48-snap-gene-57.36	Initial_vs_Flower_bud	2.60546	up	0.0003	0.00255629
phosphatidic acid phosphohydrolase 2	VaccDscaff23-snap-gene-320.32	Initial_vs_Flower_bud	2.60799	up	0.00085	0.00632968
SCARECROW-like 8	VaccDscaff29-processed-gene-53.5	Initial_vs_Flower_bud	2.608	up	5e-05	0.000509113
interferon related developmental regulator 1	VaccDscaff23-snap-gene-300.19	Initial_vs_Flower_bud	2.61041	up	0.0012	0.00848185
cyclopropyl isomerase	VaccDscaff34-snap-gene-77.42	Initial_vs_Flower_bud	2.61212	up	5e-05	0.000509113
HOPZ-ACTIVATED RESISTANCE 1	VaccDscaff28-snap-gene-170.31	Initial_vs_Flower_bud	2.61691	up	5e-05	0.000509113
P-loop containing nucleoside triphosphate hydrolases superfamily protein	VaccDscaff29-processed-gene-120.2	Initial_vs_Flower_bud	2.62028	up	0.00015	0.00138565
gamma-glutamyl transpeptidase 4	VaccDscaff42-augustus-gene-266.28	Initial_vs_Flower_bud	2.62688	up	0.0004	0.00328645
serine carboxypeptidase-like 20	VaccDscaff24-snap-gene-52.48	Initial_vs_Flower_bud	2.62783	up	5e-05	0.000509113
Heavy metal transport/detoxification superfamily protein	VaccDscaff1308-augustus-gene-0.6	Initial_vs_Flower_bud	2.63059	up	5e-05	0.000509113
hypothetical protein	VaccDscaff1-processed-gene-106.11	Initial_vs_Flower_bud	2.63589	up	0.00775	0.0395426
TCP family transcription factor	VaccDscaff4-processed-gene-248.11	Initial_vs_Flower_bud	2.64294	up	0.00515	0.0283308
casein lytic proteinase B4	VaccDscaff18-augustus-gene-174.24	Initial_vs_Flower_bud	2.65122	up	0.00825	0.0416181
Calcium-binding endonuclease/exonuclease/phosphatase family	VaccDscaff47-augustus-gene-48.23	Initial_vs_Flower_bud	2.65377	up	0.002	0.0128861
Leucine-rich repeat receptor-like protein kinase family protein	VaccDscaff34-augustus-gene-94.24	Initial_vs_Flower_bud	2.65386	up	0.00395	0.0227778
C4-dicarboxylate transporter/malic acid transport protein	VaccDscaff22-processed-gene-133.0	Initial_vs_Flower_bud	2.65496	up	5e-05	0.000509113
Integrase-type DNA-binding superfamily protein	VaccDscaff39-processed-gene-91.3	Initial_vs_Flower_bud	2.65934	up	0.00305	0.018373
NAD(P)H dehydrogenase B2	VaccDscaff24-augustus-gene-215.15	Initial_vs_Flower_bud	2.65962	up	5e-05	0.000509113
Subtilase family protein	VaccDscaff2-augustus-gene-432.32	Initial_vs_Flower_bud	2.66457	up	0.00325	0.0193808
Putative thiol-disulfide oxidoreductase DCC	VaccDscaff9-snap-gene-344.34	Initial_vs_Flower_bud	2.66681	up	5e-05	0.000509113
basic helix-loop-helix (bHLH) DNA-binding superfamily protein	VaccDscaff29-augustus-gene-336.24	Initial_vs_Flower_bud	2.66781	up	0.00015	0.00138565
response regulator 2	VaccDscaff4-snap-gene-30.31	Initial_vs_Flower_bud	2.67307	up	0.00085	0.00632968
RNA-binding (RRM/RBD/RNP motifs) family protein	VaccDscaff112-snap-gene-2.25	Initial_vs_Flower_bud	2.67566	up	0.00155	0.0104737
Calcium-dependent ARF-type GTPase activating protein family	VaccDscaff24-augustus-gene-137.28	Initial_vs_Flower_bud	2.68001	up	0.00375	0.0218303
Transducin/WD40 repeat-like superfamily protein	VaccDscaff24-snap-gene-219.44	Initial_vs_Flower_bud	2.6814	up	0.0022	0.0139552
phy rapidly regulated 1	VaccDscaff39-processed-gene-209.2	Initial_vs_Flower_bud	2.68261	up	0.00145	0.00992179
basic helix-loop-helix (bHLH) DNA-binding superfamily protein	VaccDscaff8-snap-gene-97.38	Initial_vs_Flower_bud	2.68638	up	5e-05	0.000509113
fucosyltransferase 13	VaccDscaff23-augustus-gene-356.25	Initial_vs_Flower_bud	2.69527	up	5e-05	0.000509113
Plant invertase/pectin methylesterase inhibitor superfamily	VaccDscaff48-augustus-gene-101.27	Initial_vs_Flower_bud	2.70616	up	5e-05	0.000509113
Disease resistance protein (CC-NBS-LRR class) family	VaccDscaff42-augustus-gene-67.25	Initial_vs_Flower_bud	2.70617	up	0.00045	0.00364749
pyruvate kinase, cytosolic isozyme	VaccDscaff44-augustus-gene-246.28	Initial_vs_Flower_bud	2.70716	up	5e-05	0.000509113
RING/U-box superfamily protein	VaccDscaff3-augustus-gene-3.38	Initial_vs_Flower_bud	2.70823	up	0.00415	0.0237389
alanine--tRNA ligase, chloroplastic/mitochondrial	VaccDscaff42-snap-gene-212.28	Initial_vs_Flower_bud	2.7132	up	0.00385	0.0222963
basic helix-loop-helix (bHLH) DNA-binding superfamily protein	VaccDscaff23-augustus-gene-170.31	Initial_vs_Flower_bud	2.71335	up	0.0031	0.0186275
carbonic anhydrase 2	VaccDscaff2-snap-gene-262.29	Initial_vs_Flower_bud	2.71542	up	5e-05	0.000509113
pleiotropic drug resistance 6	VaccDscaff1-augustus-gene-206.21	Initial_vs_Flower_bud	2.72529	up	0.00065	0.00502564
DNA-directed RNA polymerase, RBP11-like protein	VaccDscaff17-snap-gene-260.52	Initial_vs_Flower_bud	2.72941	up	5e-05	0.000509113
SAUR-like auxin-responsive protein family	VaccDscaff48-processed-gene-104.2	Initial_vs_Flower_bud	2.73051	up	5e-05	0.000509113
flotillin-like protein 1	VaccDscaff34-augustus-gene-47.33	Initial_vs_Flower_bud	2.73394	up	5e-05	0.000509113
CLP protease R subunit 4	VaccDscaff46-snap-gene-42.48	Initial_vs_Flower_bud	2.73477	up	0.00305	0.018373
N-MYC downregulated-like 2	VaccDscaff3-augustus-gene-420.19	Initial_vs_Flower_bud	2.73709	up	5e-05	0.000509113
calmodulin-binding protein	VaccDscaff44-snap-gene-246.34	Initial_vs_Flower_bud	2.73931	up	0.0012	0.00848185
xylose isomerase family protein	VaccDscaff39-augustus-gene-2.30	Initial_vs_Flower_bud	2.74515	up	0.0001	0.000960986
ferrochelatase-2, chloroplastic	VaccDscaff14-augustus-gene-8.25	Initial_vs_Flower_bud	2.74763	up	0.0002	0.00178731
tetratricopeptide repeat (TPR)-containing protein	VaccDscaff1481-snap-gene-0.4	Initial_vs_Flower_bud	2.74782	up	0.00015	0.00138565
Pentatricopeptide repeat (PPR) superfamily protein	VaccDscaff42-snap-gene-183.30	Initial_vs_Flower_bud	2.74979	up	5e-05	0.000509113
Actin-like ATPase superfamily protein	VaccDscaff34-augustus-gene-45.21	Initial_vs_Flower_bud	2.75251	up	0.00175	0.0115544
nuclear factor Y, subunit B8	VaccDscaff48-snap-gene-60.42	Initial_vs_Flower_bud	2.75423	up	0.00125	0.0087766
OSBP(oxysterol binding protein)-related protein 1C	VaccDscaff3-augustus-gene-258.29	Initial_vs_Flower_bud	2.75553	up	5e-05	0.000509113
calmodulin (CAM)-binding protein of 25 kDa	VaccDscaff29-processed-gene-297.6	Initial_vs_Flower_bud	2.76036	up	0.0009	0.00664913
fumarylacetoacetase	VaccDscaff217-processed-gene-1.3	Initial_vs_Flower_bud	2.76573	up	5e-05	0.000509113
arogenate dehydratase 6	VaccDscaff47-processed-gene-59.3	Initial_vs_Flower_bud	2.76701	up	5e-05	0.000509113
Leucine-rich repeat protein kinase family protein	VaccDscaff71-augustus-gene-1.36	Initial_vs_Flower_bud	2.77057	up	0.0017	0.0112779
Galactose oxidase/kelch repeat superfamily protein	VaccDscaff22-snap-gene-11.39	Initial_vs_Flower_bud	2.7789	up	0.00015	0.00138565
nucleotide-rhamnose synthase/epimerase-reductase	VaccDscaff46-augustus-gene-10.20	Initial_vs_Flower_bud	2.77992	up	0.00365	0.0213397
UDP-D-glucuronate 4-epimerase 6	VaccDscaff237-augustus-gene-0.44	Initial_vs_Flower_bud	2.78085	up	5e-05	0.000509113
phosphatidylinositol-specific phospholipase c	VaccDscaff42-processed-gene-200.3	Initial_vs_Flower_bud	2.78424	up	0.00055	0.00434745
SEC14-like 3	VaccDscaff42-augustus-gene-187.24	Initial_vs_Flower_bud	2.78579	up	0.00035	0.00292308
UDP-Glycosyltransferase superfamily protein	VaccDscaff3-processed-gene-129.15	Initial_vs_Flower_bud	2.78664	up	0.00085	0.00632968
non-intrinsic ABC protein 9	VaccDscaff34-snap-gene-188.51	Initial_vs_Flower_bud	2.7891	up	5e-05	0.000509113
PYRIMIDINE 4	VaccDscaff34-augustus-gene-283.20	Initial_vs_Flower_bud	2.79483	up	0.00145	0.00992179
aquaporin NIP1-1-like	VaccDscaff28-augustus-gene-142.19	Initial_vs_Flower_bud	2.79601	up	0.0093	0.0457814
MYST/Esa1-associated factor 6	VaccDscaff35-augustus-gene-22.33	Initial_vs_Flower_bud	2.79861	up	5e-05	0.000509113
ataurora1	VaccDscaff31-snap-gene-115.31	Initial_vs_Flower_bud	2.80251	up	0.0011	0.00788288
CDPK-related kinase 1	VaccDscaff29-snap-gene-303.18	Initial_vs_Flower_bud	2.81823	up	0.0069	0.0359626
rac-like GTP-binding protein RHO1	VaccDscaff23-snap-gene-8.38	Initial_vs_Flower_bud	2.82104	up	0.00045	0.00364749
TRICHOME BIREFRINGENCE-LIKE 25	VaccDscaff22-augustus-gene-8.25	Initial_vs_Flower_bud	2.82507	up	5e-05	0.000509113
Major facilitator superfamily protein	VaccDscaff30-augustus-gene-333.23	Initial_vs_Flower_bud	2.84394	up	0.0071	0.0368217
C-CAP/cofactor C-like domain-containing protein	VaccDscaff39-processed-gene-86.3	Initial_vs_Flower_bud	2.8512	up	5e-05	0.000509113
Phosphatidylinositol-4-phosphate 5-kinase family protein	VaccDscaff22-augustus-gene-100.28	Initial_vs_Flower_bud	2.86001	up	0.01005	0.0486971
2-oxoglutarate-dependent dioxygenase DAO-like	VaccDscaff29-snap-gene-325.24	Initial_vs_Flower_bud	2.86145	up	0.00465	0.0260951
ribosomal protein L5	VaccDscaff43-augustus-gene-69.32	Initial_vs_Flower_bud	2.86155	up	0.0007	0.00535742
Protein phosphatase 2C family protein	VaccDscaff3-augustus-gene-234.16	Initial_vs_Flower_bud	2.86567	up	0.0007	0.00535742
benzyl alcohol O-benzoyltransferase	VaccDscaff48-augustus-gene-109.40	Initial_vs_Flower_bud	2.86661	up	5e-05	0.000509113
Plant invertase/pectin methylesterase inhibitor superfamily	VaccDscaff18-augustus-gene-90.27	Initial_vs_Flower_bud	2.86816	up	5e-05	0.000509113
omega-3 fatty acid desaturase, chloroplastic	VaccDscaff29-augustus-gene-123.24	Initial_vs_Flower_bud	2.86825	up	5e-05	0.000509113
eukaryotic translation initiation factor 3 subunit K-like	VaccDscaff158-snap-gene-0.22	Initial_vs_Flower_bud	2.87362	up	5e-05	0.000509113
probable 1-deoxy-D-xylulose-5-phosphate synthase 2, chloroplastic	VaccDscaff70-snap-gene-2.31	Initial_vs_Flower_bud	2.87667	up	0.003	0.0181156
exportin 4	VaccDscaff83-augustus-gene-4.39	Initial_vs_Flower_bud	2.87989	up	5e-05	0.000509113
CDK-activating kinase 1AT	VaccDscaff41-augustus-gene-207.34	Initial_vs_Flower_bud	2.88263	up	5e-05	0.000509113
EamA-like transporter family protein	VaccDscaff3-augustus-gene-249.22	Initial_vs_Flower_bud	2.88547	up	5e-05	0.000509113
plant U-box 29	VaccDscaff6-processed-gene-301.4	Initial_vs_Flower_bud	2.8859	up	0.00045	0.00364749
Nucleotidylyl transferase superfamily protein	VaccDscaff1426-augustus-gene-0.2	Initial_vs_Flower_bud	2.88743	up	0.00095	0.00696513
BSD domain containing 1	VaccDscaff51-processed-gene-21.5	Initial_vs_Flower_bud	2.89016	up	0.0076	0.0389428
YALI0F02695p	VaccDscaff32-snap-gene-244.29	Initial_vs_Flower_bud	2.89234	up	0.0012	0.00848185
Heavy metal transport/detoxification superfamily protein	VaccDscaff3-augustus-gene-35.31	Initial_vs_Flower_bud	2.90081	up	5e-05	0.000509113
dehydrogenase/reductase 12	VaccDscaff23-snap-gene-218.25	Initial_vs_Flower_bud	2.90385	up	5e-05	0.000509113
VIRB2-interacting protein 2	VaccDscaff28-augustus-gene-35.25	Initial_vs_Flower_bud	2.91074	up	0.00055	0.00434745
Nucleotide-diphospho-sugar transferases superfamily protein	VaccDscaff43-snap-gene-221.31	Initial_vs_Flower_bud	2.91534	up	5e-05	0.000509113
Subtilase family protein	VaccDscaff42-augustus-gene-214.39	Initial_vs_Flower_bud	2.92363	up	0.0003	0.00255629
RNA-binding (RRM/RBD/RNP motifs) family protein	VaccDscaff47-augustus-gene-91.28	Initial_vs_Flower_bud	2.92526	up	5e-05	0.000509113
vesicle transport V-snare 13	VaccDscaff32-augustus-gene-283.29	Initial_vs_Flower_bud	2.92723	up	0.00875	0.0436793
cationic amino acid transporter 2	VaccDscaff29-processed-gene-283.0	Initial_vs_Flower_bud	2.9275	up	0.00045	0.00364749
production of anthocyanin pigment 1	VaccDscaff13-augustus-gene-105.26	Initial_vs_Flower_bud	2.92824	up	5e-05	0.000509113
chromatin remodeling factor CHD3 (PICKLE)	VaccDscaff44-snap-gene-64.30	Initial_vs_Flower_bud	2.93662	up	5e-05	0.000509113
Syntaxin/t-SNARE family protein	VaccDscaff3-processed-gene-383.12	Initial_vs_Flower_bud	2.93777	up	0.00475	0.0265277
hypothetical protein	VaccDscaff51-augustus-gene-0.29	Initial_vs_Flower_bud	2.94493	up	5e-05	0.000509113
cell division cycle protein 48 homolog	VaccDscaff19-snap-gene-328.31	Initial_vs_Flower_bud	2.94531	up	5e-05	0.000509113
SET domain protein 2	VaccDscaff52-augustus-gene-16.23	Initial_vs_Flower_bud	2.94697	up	0.001	0.0072762
RECQ helicase L2	VaccDscaff18-snap-gene-190.21	Initial_vs_Flower_bud	2.94707	up	5e-05	0.000509113
FAD-dependent oxidoreductase family protein	VaccDscaff34-processed-gene-31.7	Initial_vs_Flower_bud	2.9531	up	5e-05	0.000509113
GDSL-like Lipase/Acylhydrolase superfamily protein	VaccDscaff4-snap-gene-227.35	Initial_vs_Flower_bud	2.95321	up	0.00315	0.0188828
RING/U-box superfamily protein	VaccDscaff30-processed-gene-326.3	Initial_vs_Flower_bud	2.95503	up	5e-05	0.000509113
myb domain protein 108	VaccDscaff4-augustus-gene-1.22	Initial_vs_Flower_bud	2.95542	up	5e-05	0.000509113
myo-inositol monophosphatase like 1	VaccDscaff24-augustus-gene-159.33	Initial_vs_Flower_bud	2.95893	up	0.00225	0.0142218
FASCICLIN-like arabinogalactan protein 8	VaccDscaff23-augustus-gene-123.34	Initial_vs_Flower_bud	2.96355	up	5e-05	0.000509113
RAS 5	VaccDscaff29-snap-gene-97.52	Initial_vs_Flower_bud	2.96793	up	0.0003	0.00255629
zinc transporter 5-like	VaccDscaff24-augustus-gene-167.31	Initial_vs_Flower_bud	2.97221	up	5e-05	0.000509113
Aldolase superfamily protein	VaccDscaff34-augustus-gene-176.26	Initial_vs_Flower_bud	2.97573	up	0.0001	0.000960986
beta glucosidase 41	VaccDscaff1-snap-gene-432.37	Initial_vs_Flower_bud	2.98829	up	5e-05	0.000509113
CDPK-related kinase 3	VaccDscaff67-processed-gene-7.13	Initial_vs_Flower_bud	2.99184	up	5e-05	0.000509113
Single hybrid motif superfamily protein	VaccDscaff24-snap-gene-161.31	Initial_vs_Flower_bud	2.99673	up	5e-05	0.000509113
autoinhibited Ca(2+)-ATPase 9	VaccDscaff34-augustus-gene-7.21	Initial_vs_Flower_bud	3.00703	up	0.00925	0.0455824
alpha/beta-Hydrolases superfamily protein	VaccDscaff22-augustus-gene-31.38	Initial_vs_Flower_bud	3.01828	up	5e-05	0.000509113
Phosphoinositide phosphatase family protein	VaccDscaff42-augustus-gene-26.22	Initial_vs_Flower_bud	3.01928	up	0.00695	0.0361801
regulatory-associated protein of TOR 1-like	VaccDscaff27-processed-gene-10.4	Initial_vs_Flower_bud	3.02009	up	0.003	0.0181156
DNAse I-like superfamily protein	VaccDscaff42-augustus-gene-49.32	Initial_vs_Flower_bud	3.02074	up	0.00835	0.0420389
NAD(P)-binding Rossmann-fold superfamily protein	VaccDscaff42-augustus-gene-19.41	Initial_vs_Flower_bud	3.02403	up	0.0098	0.0477051
Leucine-rich receptor-like protein kinase family protein	VaccDscaff3-processed-gene-22.11	Initial_vs_Flower_bud	3.02579	up	0.00095	0.00696513
Lipin family protein	VaccDscaff34-augustus-gene-320.22	Initial_vs_Flower_bud	3.02766	up	0.0009	0.00664913
F-box/RNI-like superfamily protein	VaccDscaff4-snap-gene-136.45	Initial_vs_Flower_bud	3.02874	up	0.00935	0.045984
purin-rich alpha 1	VaccDscaff44-snap-gene-248.36	Initial_vs_Flower_bud	3.03584	up	0.00125	0.0087766
UDP-sugar pyrophosphorylase-like	VaccDscaff3-augustus-gene-240.29	Initial_vs_Flower_bud	3.03855	up	5e-05	0.000509113
F-box family protein	VaccDscaff28-processed-gene-180.7	Initial_vs_Flower_bud	3.0429	up	0.00475	0.0265277
Sodium Bile acid symporter family	VaccDscaff29-snap-gene-202.33	Initial_vs_Flower_bud	3.04379	up	5e-05	0.000509113
permease, cytosine/purines, uracil, thiamine, allantoin family protein	VaccDscaff29-processed-gene-227.7	Initial_vs_Flower_bud	3.04984	up	0.0098	0.0477051
UDP-xylosyltransferase 2	VaccDscaff1-processed-gene-33.26	Initial_vs_Flower_bud	3.05167	up	5e-05	0.000509113
non-specific phospholipase C2	VaccDscaff24-snap-gene-347.38	Initial_vs_Flower_bud	3.05577	up	0.0035	0.0206034
shikimate kinase like 1	VaccDscaff121-snap-gene-1.36	Initial_vs_Flower_bud	3.0569	up	0.0047	0.0262955
Transmembrane amino acid transporter family protein	VaccDscaff28-snap-gene-28.41	Initial_vs_Flower_bud	3.05815	up	0.0058	0.0312156
beta-xylosidase 2	VaccDscaff51-augustus-gene-7.32	Initial_vs_Flower_bud	3.07058	up	5e-05	0.000509113
ethylene-responsive transcription factor 5	VaccDscaff48-processed-gene-87.3	Initial_vs_Flower_bud	3.07096	up	0.0052	0.0285584
Mitochondrial import inner membrane translocase subunit Tim17/Tim22/Tim23 family protein	VaccDscaff4-augustus-gene-31.50	Initial_vs_Flower_bud	3.07555	up	5e-05	0.000509113
pyruvate dehydrogenase complex E1 alpha subunit	VaccDscaff3-snap-gene-169.23	Initial_vs_Flower_bud	3.0758	up	5e-05	0.000509113
ATP synthase CF1 alpha subunit	VaccDscaff32-processed-gene-309.4	Initial_vs_Flower_bud	3.08374	up	5e-05	0.000509113
MATE efflux family protein	VaccDscaff42-processed-gene-25.13	Initial_vs_Flower_bud	3.08534	up	5e-05	0.000509113
Galactosyltransferase family protein	VaccDscaff28-snap-gene-31.31	Initial_vs_Flower_bud	3.09092	up	0.0023	0.0144852
glucan endo-1,3-beta-glucosidase	VaccDscaff46-augustus-gene-100.23	Initial_vs_Flower_bud	3.10199	up	0.00235	0.0147509
DEA(D/H)-box RNA helicase family protein	VaccDscaff23-processed-gene-344.8	Initial_vs_Flower_bud	3.1053	up	0.001	0.0072762
rhamnose biosynthesis 1	VaccDscaff39-processed-gene-214.0	Initial_vs_Flower_bud	3.10608	up	0.008	0.0405836
vacuolar protein sorting-associated protein 2.3	VaccDscaff24-processed-gene-37.23	Initial_vs_Flower_bud	3.10877	up	5e-05	0.000509113
Homeodomain-like superfamily protein	VaccDscaff3-augustus-gene-400.26	Initial_vs_Flower_bud	3.11498	up	0.00015	0.00138565
RING/U-box superfamily protein	VaccDscaff3-processed-gene-3.8	Initial_vs_Flower_bud	3.11879	up	0.00035	0.00292308
Kinesin motor family protein	VaccDscaff42-snap-gene-198.36	Initial_vs_Flower_bud	3.12822	up	0.0008	0.00600935
tripartite motif containing 45	VaccDscaff3-snap-gene-350.39	Initial_vs_Flower_bud	3.13053	up	5e-05	0.000509113
UvrABC system C protein, putative (DUF3411)	VaccDscaff47-augustus-gene-26.37	Initial_vs_Flower_bud	3.13621	up	5e-05	0.000509113
villin-like 1	VaccDscaff24-augustus-gene-70.38	Initial_vs_Flower_bud	3.13852	up	0.00055	0.00434745
Enoyl-CoA hydratase/isomerase family	VaccDscaff41-snap-gene-208.34	Initial_vs_Flower_bud	3.14078	up	0.0098	0.0477051
Pseudouridine synthase family protein	VaccDscaff29-snap-gene-168.31	Initial_vs_Flower_bud	3.14257	up	5e-05	0.000509113
S-adenosyl-L-methionine-dependent methyltransferases superfamily protein	VaccDscaff29-augustus-gene-312.20	Initial_vs_Flower_bud	3.14537	up	5e-05	0.000509113
Plant invertase/pectin methylesterase inhibitor superfamily protein	VaccDscaff48-processed-gene-90.7	Initial_vs_Flower_bud	3.14745	up	5e-05	0.000509113
AZA-guanine resistant1	VaccDscaff48-augustus-gene-82.26	Initial_vs_Flower_bud	3.15065	up	5e-05	0.000509113
Embryo-specific protein 3, (ATS3)	VaccDscaff34-augustus-gene-40.29	Initial_vs_Flower_bud	3.15606	up	5e-05	0.000509113
ortholog of sugar beet HS1 PRO-1 2	VaccDscaff29-processed-gene-130.1	Initial_vs_Flower_bud	3.15851	up	0.0007	0.00535742
BR enhanced expression 3	VaccDscaff28-augustus-gene-214.17	Initial_vs_Flower_bud	3.15895	up	0.00295	0.017862
winged-helix DNA-binding transcription factor family protein	VaccDscaff47-augustus-gene-167.22	Initial_vs_Flower_bud	3.16653	up	0.00225	0.0142218
KDEL motif-containing protein 1	VaccDscaff1482-augustus-gene-0.3	Initial_vs_Flower_bud	3.16915	up	0.00345	0.020355
probable serine/threonine-protein kinase WNK4	VaccDscaff1352-augustus-gene-0.6	Initial_vs_Flower_bud	3.17156	up	0.00285	0.0173568
probable adenylate kinase 1, chloroplastic	VaccDscaff84-augustus-gene-5.41	Initial_vs_Flower_bud	3.1728	up	0.00315	0.0188828
RNA helicase family protein	VaccDscaff3-augustus-gene-194.30	Initial_vs_Flower_bud	3.18549	up	0.00505	0.0278692
sigma factor E	VaccDscaff1744-snap-gene-0.5	Initial_vs_Flower_bud	3.18587	up	5e-05	0.000509113
ARM repeat superfamily protein	VaccDscaff34-augustus-gene-279.37	Initial_vs_Flower_bud	3.18863	up	0.00025	0.00217815
Protein kinase superfamily protein	VaccDscaff4-augustus-gene-399.33	Initial_vs_Flower_bud	3.19282	up	0.00325	0.0193808
Cystatin/monellin superfamily protein	VaccDscaff9-processed-gene-115.20	Initial_vs_Flower_bud	3.19427	up	0.0048	0.0267622
calreticulin	VaccDscaff45-processed-gene-134.7	Initial_vs_Flower_bud	3.20038	up	0.00375	0.0218303
6-phosphogluconate dehydrogenase family protein	VaccDscaff34-augustus-gene-224.28	Initial_vs_Flower_bud	3.20478	up	0.00015	0.00138565
cyclin-A3-2-like	VaccDscaff43-snap-gene-55.49	Initial_vs_Flower_bud	3.20981	up	0.00055	0.00434745
alpha/beta-Hydrolases superfamily protein	VaccDscaff51-augustus-gene-7.37	Initial_vs_Flower_bud	3.21391	up	5e-05	0.000509113
STRUBBELIG-receptor family 6	VaccDscaff34-snap-gene-3.34	Initial_vs_Flower_bud	3.21776	up	0.0003	0.00255629
Phosphatidic acid phosphatase (PAP2) family protein	VaccDscaff1-processed-gene-179.5	Initial_vs_Flower_bud	3.21805	up	5e-05	0.000509113
Leucine-rich repeat protein kinase family protein	VaccDscaff3-augustus-gene-317.34	Initial_vs_Flower_bud	3.22203	up	0.00195	0.0126184
ACT domain repeat 8	VaccDscaff46-augustus-gene-15.16	Initial_vs_Flower_bud	3.22515	up	0.00195	0.0126184
CLP protease regulatory subunit X	VaccDscaff29-snap-gene-37.25	Initial_vs_Flower_bud	3.22947	up	5e-05	0.000509113
3-isopropylmalate dehydrogenase, chloroplastic	VaccDscaff34-processed-gene-47.0	Initial_vs_Flower_bud	3.24561	up	5e-05	0.000509113
dihydrofolate reductase Dfr1	VaccDscaff293-augustus-gene-0.43	Initial_vs_Flower_bud	3.24566	up	0.00165	0.0110142
metacaspase 1	VaccDscaff48-snap-gene-85.37	Initial_vs_Flower_bud	3.24946	up	0.00935	0.045984
trichome birefringence-like protein (DUF828)	VaccDscaff48-snap-gene-67.38	Initial_vs_Flower_bud	3.26846	up	0.0053	0.0290156
origin recognition complex 1	VaccDscaff39-snap-gene-177.30	Initial_vs_Flower_bud	3.27184	up	0.0004	0.00328645
probable 6-phosphogluconolactonase 2	VaccDscaff48-augustus-gene-16.24	Initial_vs_Flower_bud	3.27384	up	0.0087	0.0434743
epoxide hydrolase 2, cytoplasmic	VaccDscaff4-snap-gene-241.22	Initial_vs_Flower_bud	3.2744	up	0.0062	0.0329347
CYCLIN D1;1	VaccDscaff4-augustus-gene-308.27	Initial_vs_Flower_bud	3.28294	up	0.00095	0.00696513
response regulator 17	VaccDscaff48-snap-gene-84.37	Initial_vs_Flower_bud	3.29173	up	0.00245	0.0152794
uridine kinase-like 4	VaccDscaff5-snap-gene-409.23	Initial_vs_Flower_bud	3.29426	up	5e-05	0.000509113
SEC7-like guanine nucleotide exchange family protein	VaccDscaff30-augustus-gene-76.26	Initial_vs_Flower_bud	3.29435	up	5e-05	0.000509113
Transmembrane amino acid transporter family protein	VaccDscaff34-processed-gene-46.6	Initial_vs_Flower_bud	3.30366	up	0.0002	0.00178731
L-aspartate oxidase	VaccDscaff18-augustus-gene-361.27	Initial_vs_Flower_bud	3.30979	up	0.00945	0.0463849
SNARE-like superfamily protein	VaccDscaff39-snap-gene-21.31	Initial_vs_Flower_bud	3.31181	up	5e-05	0.000509113
O-glucosyltransferase rumi	VaccDscaff23-processed-gene-105.1	Initial_vs_Flower_bud	3.31551	up	0.0066	0.0346654
WEB family protein (DUF827)	VaccDscaff29-augustus-gene-112.19	Initial_vs_Flower_bud	3.33068	up	0.00635	0.0335752
Pentatricopeptide repeat (PPR) superfamily protein	VaccDscaff1-snap-gene-110.33	Initial_vs_Flower_bud	3.3398	up	5e-05	0.000509113
DnaJ heat shock protein family (Hsp40) member B4	VaccDscaff44-augustus-gene-93.30	Initial_vs_Flower_bud	3.34391	up	0.00065	0.00502564
ALG13, UDP-N-acetylglucosaminyltransferase subunit	VaccDscaff34-augustus-gene-161.23	Initial_vs_Flower_bud	3.35288	up	0.0021	0.0134248
non-intrinsic ABC protein 3	VaccDscaff34-augustus-gene-57.28	Initial_vs_Flower_bud	3.35421	up	0.0036	0.0210985
golgin Putative 5	VaccDscaff34-augustus-gene-28.38	Initial_vs_Flower_bud	3.35445	up	0.00065	0.00502564
guanine nucleotide-binding protein subunit gamma	VaccDscaff29-snap-gene-10.41	Initial_vs_Flower_bud	3.36157	up	0.00845	0.0424535
glycerol-3-phosphate acyltransferase 6	VaccDscaff34-snap-gene-260.51	Initial_vs_Flower_bud	3.36191	up	5e-05	0.000509113
Biotin/lipoate A/B protein ligase family	VaccDscaff23-processed-gene-333.9	Initial_vs_Flower_bud	3.36308	up	5e-05	0.000509113
9-cis-epoxycarotenoid dioxygenase	VaccDscaff1-processed-gene-398.3	Initial_vs_Flower_bud	3.37511	up	5e-05	0.000509113
NADH dehydrogenase (ubiquinone)s	VaccDscaff3-snap-gene-54.38	Initial_vs_Flower_bud	3.37762	up	5e-05	0.000509113
Major facilitator superfamily protein	VaccDscaff1-augustus-gene-165.47	Initial_vs_Flower_bud	3.37999	up	0.0019	0.0123531
potassium channel beta subunit 1	VaccDscaff4-augustus-gene-104.13	Initial_vs_Flower_bud	3.3801	up	0.0001	0.000960986
putative recombination initiation defect 1	VaccDscaff4-augustus-gene-125.37	Initial_vs_Flower_bud	3.38477	up	5e-05	0.000509113
early nodulin-like protein 17	VaccDscaff4-augustus-gene-397.37	Initial_vs_Flower_bud	3.40614	up	5e-05	0.000509113
GTPase Spg1	VaccDscaff39-augustus-gene-271.22	Initial_vs_Flower_bud	3.40711	up	0.0018	0.0118272
G-patch domain containing 8	VaccDscaff3-augustus-gene-63.26	Initial_vs_Flower_bud	3.41103	up	5e-05	0.000509113
ATPase family AAA domain containing 1a	VaccDscaff48-snap-gene-97.31	Initial_vs_Flower_bud	3.41365	up	0.00115	0.00818736
AAA-type ATPase family protein	VaccDscaff47-snap-gene-54.12	Initial_vs_Flower_bud	3.41725	up	5e-05	0.000509113
early nodulin-like protein 1	VaccDscaff628-augustus-gene-0.11	Initial_vs_Flower_bud	3.4179	up	0.0023	0.0144852
SOS3-interacting protein 4	VaccDscaff34-processed-gene-285.5	Initial_vs_Flower_bud	3.42499	up	0.0013	0.0090707
ER lipid raft associated 2 S homeolog	VaccDscaff3-augustus-gene-122.28	Initial_vs_Flower_bud	3.42672	up	0.0043	0.024449
UPF0497 membrane protein 4	VaccDscaff1-snap-gene-43.41	Initial_vs_Flower_bud	3.42844	up	5e-05	0.000509113
Major facilitator superfamily protein	VaccDscaff3-augustus-gene-203.31	Initial_vs_Flower_bud	3.43193	up	0.00065	0.00502564
chloroplast thylakoid lumen protein	VaccDscaff23-snap-gene-35.44	Initial_vs_Flower_bud	3.43552	up	5e-05	0.000509113
P-loop containing nucleoside triphosphate hydrolases superfamily protein	VaccDscaff47-snap-gene-58.39	Initial_vs_Flower_bud	3.43946	up	0.0036	0.0210985
Duplicated homeodomain-like superfamily protein	VaccDscaff3-augustus-gene-99.26	Initial_vs_Flower_bud	3.44313	up	0.0001	0.000960986
nudix hydrolase homolog 3	VaccDscaff34-augustus-gene-55.35	Initial_vs_Flower_bud	3.44462	up	5e-05	0.000509113
CCCH-type zinc finger family protein	VaccDscaff28-augustus-gene-151.14	Initial_vs_Flower_bud	3.44763	up	5e-05	0.000509113
phy rapidly regulated 2	VaccDscaff6-processed-gene-177.12	Initial_vs_Flower_bud	3.45187	up	0.0078	0.0397474
putative O-acyltransferase	VaccDscaff56-snap-gene-3.47	Initial_vs_Flower_bud	3.45298	up	5e-05	0.000509113
galacturonic acid kinase	VaccDscaff23-augustus-gene-77.28	Initial_vs_Flower_bud	3.45325	up	5e-05	0.000509113
linoleate 13S-lipoxygenase 3-1, chloroplastic-like	VaccDscaff4-augustus-gene-410.18	Initial_vs_Flower_bud	3.47966	up	0.00285	0.0173568
ABC-2 type transporter family protein	VaccDscaff84-processed-gene-3.7	Initial_vs_Flower_bud	3.48219	up	5e-05	0.000509113
Nucleotide-diphospho-sugar transferase family protein	VaccDscaff23-augustus-gene-339.27	Initial_vs_Flower_bud	3.4881	up	0.0011	0.00788288
ovate family protein 3	VaccDscaff24-processed-gene-61.8	Initial_vs_Flower_bud	3.49346	up	5e-05	0.000509113
protein DROOPING LEAF-like	VaccDscaff3-augustus-gene-123.20	Initial_vs_Flower_bud	3.50212	up	5e-05	0.000509113
HXXXD-type acyl-transferase family protein	VaccDscaff18-augustus-gene-312.31	Initial_vs_Flower_bud	3.50731	up	5e-05	0.000509113
UDP-XYL synthase 5	VaccDscaff47-augustus-gene-92.25	Initial_vs_Flower_bud	3.50912	up	0.0074	0.0380901
DNAJ heat shock N-terminal domain-containing protein	VaccDscaff97-augustus-gene-2.25	Initial_vs_Flower_bud	3.52295	up	5e-05	0.000509113
3-ketoacyl-CoA synthase 10	VaccDscaff24-augustus-gene-329.18	Initial_vs_Flower_bud	3.52365	up	0.00125	0.0087766
basic helix-loop-helix (bHLH) DNA-binding superfamily protein	VaccDscaff1-snap-gene-279.13	Initial_vs_Flower_bud	3.52865	up	0.00045	0.00364749
Argonaute family protein	VaccDscaff41-snap-gene-57.36	Initial_vs_Flower_bud	3.53042	up	5e-05	0.000509113
Protein RICE SALT SENSITIVE 3	VaccDscaff4-processed-gene-306.7	Initial_vs_Flower_bud	3.53548	up	0.001	0.0072762
translocase of the outer mitochondrial membrane 40	VaccDscaff47-snap-gene-126.50	Initial_vs_Flower_bud	3.53901	up	5e-05	0.000509113
tankyrase, TRF1-interacting ankyrin-related ADP-ribose polymerase	VaccDscaff30-processed-gene-112.28	Initial_vs_Flower_bud	3.55875	up	0.0002	0.00178731
Galactose oxidase/kelch repeat superfamily protein	VaccDscaff4-processed-gene-263.13	Initial_vs_Flower_bud	3.55993	up	0.0041	0.0235034
aarF domain containing kinase 1	VaccDscaff27-augustus-gene-264.32	Initial_vs_Flower_bud	3.56509	up	0.0008	0.00600935
Protein NEOXANTHIN-DEFICIENT 1	VaccDscaff4-snap-gene-254.29	Initial_vs_Flower_bud	3.57068	up	0.00075	0.00568581
phototropin 1	VaccDscaff24-augustus-gene-91.31	Initial_vs_Flower_bud	3.5755	up	0.0046	0.0258662
cytochrome P450 71A9-like	VaccDscaff24-snap-gene-148.64	Initial_vs_Flower_bud	3.59218	up	0.00025	0.00217815
WRKY DNA-binding protein 46	VaccDscaff1011-augustus-gene-0.5	Initial_vs_Flower_bud	3.59791	up	0.0009	0.00664913
cytidine deaminase 1	VaccDscaff29-processed-gene-2.5	Initial_vs_Flower_bud	3.60479	up	0.00195	0.0126184
salt tolerance zinc finger	VaccDscaff3-processed-gene-10.6	Initial_vs_Flower_bud	3.60631	up	0.00545	0.0296438
Bifunctional inhibitor/lipid-transfer protein/seed storage 2S albumin superfamily protein	VaccDscaff24-augustus-gene-308.16	Initial_vs_Flower_bud	3.61262	up	0.0008	0.00600935
LMBR1-like membrane protein	VaccDscaff28-augustus-gene-87.20	Initial_vs_Flower_bud	3.61553	up	0.00955	0.0467232
glycerol-3-phosphate acyltransferase 4	VaccDscaff23-snap-gene-103.32	Initial_vs_Flower_bud	3.6221	up	0.00975	0.047509
F-box/RNI-like superfamily protein	VaccDscaff47-augustus-gene-182.24	Initial_vs_Flower_bud	3.62534	up	5e-05	0.000509113
magnesium transporter MRS2-E-like	VaccDscaff6-augustus-gene-289.21	Initial_vs_Flower_bud	3.63225	up	0.0098	0.0477051
Pyridoxal phosphate (PLP)-dependent transferases superfamily protein	VaccDscaff3-snap-gene-83.33	Initial_vs_Flower_bud	3.65075	up	0.00435	0.0246889
Pectinacetylesterase family protein	VaccDscaff3-snap-gene-61.30	Initial_vs_Flower_bud	3.65435	up	0.00335	0.0198581
Putative endoplasmic reticulum metallopeptidase 1-B	VaccDscaff35-snap-gene-170.28	Initial_vs_Flower_bud	3.65662	up	0.0006	0.00468546
dehydroquinate dehydratase, putative / shikimate dehydrogenase	VaccDscaff51-augustus-gene-18.25	Initial_vs_Flower_bud	3.66182	up	0.00035	0.00292308
Cyclase family protein	VaccDscaff751-processed-gene-0.9	Initial_vs_Flower_bud	3.67411	up	5e-05	0.000509113
TBC1 domain family member 2	VaccDscaff1-augustus-gene-377.22	Initial_vs_Flower_bud	3.67842	up	0.00815	0.0412057
MAP kinase 19	VaccDscaff1-processed-gene-396.7	Initial_vs_Flower_bud	3.68278	up	0.0002	0.00178731
cellulose synthase-like D1	VaccDscaff4-augustus-gene-106.58	Initial_vs_Flower_bud	3.68543	up	0.0096	0.046912
phosphoinositide 4-kinase gamma 4	VaccDscaff28-snap-gene-16.41	Initial_vs_Flower_bud	3.69086	up	0.0025	0.0155349
Pollen Ole e 1 allergen and extensin family protein	VaccDscaff42-snap-gene-49.41	Initial_vs_Flower_bud	3.71374	up	0.0001	0.000960986
3-ketoacyl-CoA synthase 6	VaccDscaff48-augustus-gene-92.19	Initial_vs_Flower_bud	3.71564	up	5e-05	0.000509113
plasma membrane intrinsic protein 1;4	VaccDscaff29-snap-gene-130.29	Initial_vs_Flower_bud	3.71669	up	0.0002	0.00178731
sulfoquinovosyldiacylglycerol 2	VaccDscaff34-augustus-gene-259.32	Initial_vs_Flower_bud	3.73235	up	0.00145	0.00992179
alpha/beta-Hydrolases superfamily protein	VaccDscaff29-snap-gene-287.30	Initial_vs_Flower_bud	3.76468	up	0.00335	0.0198581
probable cytokinin riboside 5'-monophosphate phosphoribohydrolase LOGL1	VaccDscaff14-snap-gene-55.23	Initial_vs_Flower_bud	3.76715	up	0.0071	0.0368217
HXXXD-type acyl-transferase family protein	VaccDscaff23-augustus-gene-277.24	Initial_vs_Flower_bud	3.77357	up	0.0026	0.0160553
CASP-like protein 1B1	VaccDscaff20-augustus-gene-226.16	Initial_vs_Flower_bud	3.7738	up	0.0042	0.0239796
phosphatidylinositol-4-phosphate 5-kinase 2	VaccDscaff3-augustus-gene-259.22	Initial_vs_Flower_bud	3.77731	up	0.00345	0.020355
DYNAMIN-like 1C	VaccDscaff3-snap-gene-319.25	Initial_vs_Flower_bud	3.78323	up	0.00745	0.0383035
glutaminyl cyclase	VaccDscaff48-snap-gene-95.50	Initial_vs_Flower_bud	3.78713	up	0.0004	0.00328645
3-isopropylmalate dehydrogenase, chloroplastic	VaccDscaff5-augustus-gene-235.32	Initial_vs_Flower_bud	3.79302	up	5e-05	0.000509113
WRKY DNA-binding protein 57	VaccDscaff4-augustus-gene-323.18	Initial_vs_Flower_bud	3.80129	up	5e-05	0.000509113
DNA polymerase delta small subunit	VaccDscaff29-snap-gene-343.32	Initial_vs_Flower_bud	3.80205	up	0.00945	0.0463849
Nucleotide-diphospho-sugar transferases superfamily protein	VaccDscaff1111-augustus-gene-0.6	Initial_vs_Flower_bud	3.8035	up	5e-05	0.000509113
hypothetical protein	VaccDscaff3-processed-gene-158.6	Initial_vs_Flower_bud	3.80706	up	5e-05	0.000509113
glucuronoxylan 4-O-methyltransferase-like protein (DUF579)	VaccDscaff3-augustus-gene-223.25	Initial_vs_Flower_bud	3.81502	up	5e-05	0.000509113
putative ATPase Msp1	VaccDscaff28-augustus-gene-337.18	Initial_vs_Flower_bud	3.81606	up	5e-05	0.000509113
ATPase, V0/A0 complex, subunit C/D	VaccDscaff20-snap-gene-73.37	Initial_vs_Flower_bud	3.82316	up	0.00715	0.0370195
Integrase-type DNA-binding superfamily protein	VaccDscaff28-snap-gene-328.35	Initial_vs_Flower_bud	3.82802	up	0.00055	0.00434745
transmembrane protein 53	VaccDscaff4-augustus-gene-246.14	Initial_vs_Flower_bud	3.8299	up	0.0002	0.00178731
anaphase promoting complex 6	VaccDscaff1370-processed-gene-0.1	Initial_vs_Flower_bud	3.84229	up	5e-05	0.000509113
U11/U12 small nuclear ribonucleoprotein	VaccDscaff23-snap-gene-94.37	Initial_vs_Flower_bud	3.84694	up	0.00585	0.0314445
Transducin/WD40 repeat-like superfamily protein	VaccDscaff29-processed-gene-65.3	Initial_vs_Flower_bud	3.85745	up	5e-05	0.000509113
cysteine-rich RLK (RECEPTOR-like protein kinase) 25	VaccDscaff3-snap-gene-375.36	Initial_vs_Flower_bud	3.86225	up	5e-05	0.000509113
farnesylated protein 3	VaccDscaff4-snap-gene-387.27	Initial_vs_Flower_bud	3.86654	up	0.00115	0.00818736
fatty acid desaturase family protein	VaccDscaff24-augustus-gene-233.19	Initial_vs_Flower_bud	3.8711	up	5e-05	0.000509113
homeobox-leucine zipper protein ROC2-like	VaccDscaff1-snap-gene-362.29	Initial_vs_Flower_bud	3.87159	up	0.0013	0.0090707
Heavy metal transport/detoxification superfamily protein	VaccDscaff10-processed-gene-219.16	Initial_vs_Flower_bud	3.87873	up	0.0001	0.000960986
metal tolerance protein 4-like	VaccDscaff29-augustus-gene-347.24	Initial_vs_Flower_bud	3.8881	up	5e-05	0.000509113
Leucine-rich repeat protein kinase family protein	VaccDscaff74-augustus-gene-7.33	Initial_vs_Flower_bud	3.88974	up	5e-05	0.000509113
cell wall protein precursor	VaccDscaff52-snap-gene-6.30	Initial_vs_Flower_bud	3.90514	up	0.008	0.0405836
NPC intracellular cholesterol transporter 1	VaccDscaff23-snap-gene-358.49	Initial_vs_Flower_bud	3.91066	up	5e-05	0.000509113
plant U-box 18	VaccDscaff4-processed-gene-304.7	Initial_vs_Flower_bud	3.91424	up	5e-05	0.000509113
PATATIN-like protein 6	VaccDscaff48-augustus-gene-57.30	Initial_vs_Flower_bud	3.9244	up	0.00145	0.00992179
POX (plant homeobox) family protein	VaccDscaff28-augustus-gene-39.22	Initial_vs_Flower_bud	3.92499	up	0.00325	0.0193808
Tyrosine transaminase family protein	VaccDscaff1-augustus-gene-339.18	Initial_vs_Flower_bud	3.93235	up	0.0062	0.0329347
peptidase M20/M25/M40 family protein	VaccDscaff4-augustus-gene-309.25	Initial_vs_Flower_bud	3.94711	up	5e-05	0.000509113
hydroxymethylglutaryl coenzyme A reductase	VaccDscaff23-snap-gene-55.27	Initial_vs_Flower_bud	3.96075	up	0.00215	0.0136909
glucose-6-phosphate 1-dehydrogenase, chloroplastic	VaccDscaff3-snap-gene-199.36	Initial_vs_Flower_bud	3.96428	up	0.0008	0.00600935
Concanavalin A-like lectin protein kinase family protein	VaccDscaff34-processed-gene-92.23	Initial_vs_Flower_bud	3.96936	up	5e-05	0.000509113
Cellulose-synthase-like C4	VaccDscaff18-augustus-gene-356.45	Initial_vs_Flower_bud	3.97323	up	0.00105	0.00757987
GDSL-like Lipase/Acylhydrolase superfamily protein	VaccDscaff3-augustus-gene-189.34	Initial_vs_Flower_bud	3.99716	up	0.0012	0.00848185
DENN/MADD domain containing 5B	VaccDscaff24-snap-gene-40.43	Initial_vs_Flower_bud	3.99859	up	0.0019	0.0123531
Late embryogenesis abundant (LEA) hydroxyproline-rich glycoprotein family	VaccDscaff48-processed-gene-104.8	Initial_vs_Flower_bud	4.00318	up	0.00285	0.0173568
GDSL-like Lipase/Acylhydrolase superfamily protein	VaccDscaff4-processed-gene-419.17	Initial_vs_Flower_bud	4.00368	up	0.0017	0.0112779
ring finger protein 217	VaccDscaff24-augustus-gene-158.22	Initial_vs_Flower_bud	4.02837	up	0.0004	0.00328645
Nodulin MtN21 /EamA-like transporter family protein	VaccDscaff46-snap-gene-27.36	Initial_vs_Flower_bud	4.03525	up	0.0014	0.00964257
Ankyrin repeat family protein with DHHC zinc finger domain-containing protein	VaccDscaff60-snap-gene-9.51	Initial_vs_Flower_bud	4.04039	up	5e-05	0.000509113
AGAMOUS-like 30	VaccDscaff3-snap-gene-298.24	Initial_vs_Flower_bud	4.06168	up	0.00505	0.0278692
K+ transporter 1	VaccDscaff28-augustus-gene-94.23	Initial_vs_Flower_bud	4.06238	up	0.0002	0.00178731
phosphatidylinositol glycan anchor biosynthesis, class B	VaccDscaff39-snap-gene-9.22	Initial_vs_Flower_bud	4.06674	up	0.0021	0.0134248
calcium uniporter (DUF607)	VaccDscaff23-augustus-gene-336.23	Initial_vs_Flower_bud	4.07155	up	0.00035	0.00292308
ATP-dependent caseinolytic (Clp) protease/crotonase family protein	VaccDscaff936-augustus-gene-0.5	Initial_vs_Flower_bud	4.07849	up	0.0053	0.0290156
glyoxal oxidase-related protein	VaccDscaff3-processed-gene-165.7	Initial_vs_Flower_bud	4.08214	up	0.0098	0.0477051
HCO3- transporter family	VaccDscaff51-augustus-gene-3.24	Initial_vs_Flower_bud	4.10522	up	0.0001	0.000960986
Flavin-binding monooxygenase family protein	VaccDscaff28-augustus-gene-103.21	Initial_vs_Flower_bud	4.11124	up	0.0052	0.0285584
pyridoxine biosynthesis 1.2	VaccDscaff34-snap-gene-30.48	Initial_vs_Flower_bud	4.11643	up	5e-05	0.000509113
ELL associated factor 1	VaccDscaff31-augustus-gene-42.19	Initial_vs_Flower_bud	4.12003	up	0.00545	0.0296438
Polynucleotidyl transferase, ribonuclease H-like superfamily protein	VaccDscaff47-processed-gene-49.2	Initial_vs_Flower_bud	4.13023	up	0.0037	0.0215877
trigalactosyldiacylglycerol 1	VaccDscaff4-augustus-gene-129.40	Initial_vs_Flower_bud	4.13781	up	0.0007	0.00535742
Pectin lyase-like superfamily protein	VaccDscaff3-augustus-gene-331.22	Initial_vs_Flower_bud	4.14758	up	0.00575	0.0309915
arabinogalactan protein 18	VaccDscaff454-augustus-gene-0.22	Initial_vs_Flower_bud	4.16007	up	0.0001	0.000960986
myosin-binding protein (Protein of unknown function, DUF593)	VaccDscaff1287-processed-gene-0.0	Initial_vs_Flower_bud	4.17262	up	5e-05	0.000509113
hexokinase 1	VaccDscaff42-augustus-gene-254.11	Initial_vs_Flower_bud	4.20993	up	0.0059	0.0316691
H[+]-ATPase 11	VaccDscaff17-augustus-gene-253.34	Initial_vs_Flower_bud	4.21031	up	0.00265	0.0163189
Pectinacetylesterase family protein	VaccDscaff17-augustus-gene-157.13	Initial_vs_Flower_bud	4.21129	up	5e-05	0.000509113
thaumatin-like protein 1a	VaccDscaff23-snap-gene-345.31	Initial_vs_Flower_bud	4.21134	up	5e-05	0.000509113
F-box family protein	VaccDscaff1-augustus-gene-169.17	Initial_vs_Flower_bud	4.21553	up	5e-05	0.000509113
NAC domain containing protein 100	VaccDscaff42-augustus-gene-163.37	Initial_vs_Flower_bud	4.22809	up	0.00475	0.0265277
Di-glucose binding protein with Kinesin motor domain-containing protein	VaccDscaff3-snap-gene-237.28	Initial_vs_Flower_bud	4.24635	up	0.0096	0.046912
myb domain protein 78	VaccDscaff1-processed-gene-8.0	Initial_vs_Flower_bud	4.25329	up	0.003	0.0181156
3-ketoacyl-CoA synthase 4	VaccDscaff3-augustus-gene-82.27	Initial_vs_Flower_bud	4.27162	up	0.00185	0.0120815
neuralized	VaccDscaff82-snap-gene-5.42	Initial_vs_Flower_bud	4.27565	up	0.00615	0.0327138
Peroxidase superfamily protein	VaccDscaff34-processed-gene-305.11	Initial_vs_Flower_bud	4.28827	up	5e-05	0.000509113
COBRA-like protein-7 precursor	VaccDscaff4-augustus-gene-30.26	Initial_vs_Flower_bud	4.28916	up	0.0001	0.000960986
S phase kinase-associated protein 1	VaccDscaff41-augustus-gene-271.31	Initial_vs_Flower_bud	4.30689	up	5e-05	0.000509113
HXXXD-type acyl-transferase family protein	VaccDscaff40-snap-gene-58.15	Initial_vs_Flower_bud	4.31808	up	5e-05	0.000509113
WRKY family transcription factor	VaccDscaff43-augustus-gene-258.25	Initial_vs_Flower_bud	4.31825	up	0.0011	0.00788288
glucose 6-phosphate/phosphate translocator 1	VaccDscaff4-augustus-gene-172.19	Initial_vs_Flower_bud	4.32679	up	0.003	0.0181156
TRICHOME BIREFRINGENCE-LIKE 41	VaccDscaff840-snap-gene-0.13	Initial_vs_Flower_bud	4.33426	up	0.0042	0.0239796
jasmonate-zim-domain protein 1	VaccDscaff29-snap-gene-11.26	Initial_vs_Flower_bud	4.33471	up	0.0086	0.0430663
bifunctional dihydroflavonol 4-reductase/flavanone 4-reductase	VaccDscaff30-augustus-gene-208.37	Initial_vs_Flower_bud	4.34881	up	0.00065	0.00502564
Eukaryotic aspartyl protease family protein	VaccDscaff29-processed-gene-254.11	Initial_vs_Flower_bud	4.35185	up	0.0028	0.0170969
calmodulin like 42	VaccDscaff34-processed-gene-292.7	Initial_vs_Flower_bud	4.35756	up	0.0001	0.000960986
oxidoreductase, 2OG-Fe(II) oxygenase family protein	VaccDscaff47-augustus-gene-178.31	Initial_vs_Flower_bud	4.36843	up	5e-05	0.000509113
[truncated: 300 more rows]
